# Supplementary material for: Incorporation of carbon dioxide into phthalides via ligand-free copper-catalyzed direct carboxylation of benzoxasiloles
Source: Royal Society of Chemistry journal article supplement (doi:10.1039/c7gc00917h), 2017-01-01

## **Supporting Information**

### ***Incorporation of Carbon Dioxide into Phthalides via Ligand-Free Copper-Catalyzed Direct Carboxylation of Benzoxasiloles***

*Thanh V. Q. Nguyen, José A. Rodríguez-Santamaría, Woo-Jin Yoo, and Shū Kobayashi\**

Department of Chemistry, School of Science, The University of Tokyo, 7-3-1, Hongo, Bunkyo-ku, Tokyo, 113-0033, Japan

## **Table of Contents**

|                                                                              |        |
|------------------------------------------------------------------------------|--------|
| General Information .....                                                    | - 2 -  |
| Part I: Preparation of Starting Materials .....                              | - 2 -  |
| Part II: Optimization and Control Experiments .....                          | - 20 - |
| Part IV: Gram-Scale Synthesis of <b>2p</b> .....                             | - 35 - |
| Part V: Synthesis of Natural Products <b>4</b> , <b>5</b> and <b>6</b> ..... | - 35 - |
| Part VI: References .....                                                    | - 38 - |
| Part VII: NMR Spectra of Starting Materials and Products .....               | - 40 - |
| Part VIII: HPLC Traces of Chiral Alcohols and Phthalides .....               | - 92 - |

## General Information

$^1\text{H}$  and  $^{13}\text{C}$  NMR spectra were recorded on a JEOL ECX-400, JEOL ECX-500 and a JEOL ECX-600 in  $\text{CDCl}_3$ ,  $\text{DMSO-d}_6$ ,  $\text{Acetone-d}_6$  or  $\text{CD}_3\text{OD}$ . Chemical shifts of  $^1\text{H}$  and  $^{13}\text{C}$  were reported in parts per million (ppm) from tetramethylsilane using the solvent resonance as the internal standard (For  $^1\text{H}$  NMR:  $\text{CDCl}_3$ : 7.27,  $\text{DMSO-d}_6$ : 2.50,  $\text{Acetone-d}_6$ : 2.05 and  $\text{CD}_3\text{OD}$ : 3.31; For  $^{13}\text{C}$  NMR:  $\text{CDCl}_3$ : 77.0,  $\text{DMSO-d}_6$ : 39.5,  $\text{Acetone-d}_6$ : 29.8 and  $\text{CD}_3\text{OD}$ : 49.0). IR spectra were measured on a JASCO FT/IR-610 spectrometer. High-resolution mass spectrometry was carried out using a JEOL JMS-T100TD (ESI and DART). HPLC analysis was performed on Shimadzu LC-20AB with chiral HPLC column. Column chromatography was carried out using silica gel obtained from Merck & Co.

**Reagents:** Unless stated otherwise, commercial organic chemicals were purchased from Tokyo Chemical Industry Co. Ltd and used as received.  $[\text{Ir}(\text{cod})(\text{OMe})_2]$  and  $[\text{Rh}(\text{nbd})\text{Cl}]_2$  were purchased from Strem Chemical Inc and stored in glovebox.  $\text{CuI}$  was purchased from Wako Pure Chemical Industries, Ltd. and stored in glovebox.  $\text{CsF}$  was obtained from Tokyo Chemical Industry Co. Ltd, dried at  $200\text{ }^\circ\text{C}$  for 18 h under strong vacuum (0.1 mmHg) and stored in glovebox. Alcohols used for the preparation of starting materials were either purchased from Tokyo Chemical Industry Co. Ltd or synthesized by reduction of the corresponding aldehydes or ketones with  $\text{NaBH}_4$ .

Organic solvents for reactions were purified by distillation under dry argon atmosphere or purchased as anhydrous solvent from Wako Pure Chemical Industries, Ltd.

## Part I: Preparation of Starting Materials

### *Synthesis of benzoxasiloles 1a-l*

#### 1,1-Diisopropyl-6-methoxy-1,3-dihydrobenzo[c][1,2]oxasilole 1a:

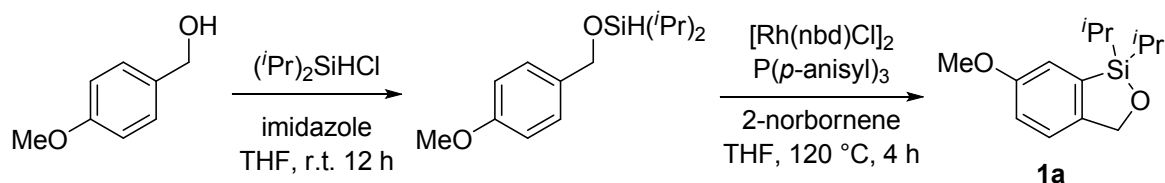

Step 1: To a 100 mL 2 neck round bottom flask was charged 4-methoxybenzyl alcohol (2.76 g, 20 mmol), imidazole (2.7 g, 20 mmol) and THF (40 mL). An argon balloon was attached and (*i*Pr)<sub>2</sub>SiHCl (3.64 g, 4.0 mL, 24 mmol) was added dropwise. The reaction was stirred overnight at room temperature and the solvent was removed under reduced pressure. Hexane (60 mL) was then added and the mixture was filtered through a Celite plug, affording a clear solution. Solvent was removed under reduced pressure to afford crude silyl ether which was directly used for the next step.

Step 2: Under air, to a 100 mL Schlenk tube was charged a solution of the silyl ether and 2-norbornene (3.8 g, 40 mmol) in THF (6 mL), a freshly prepared solution of [Rh(nbd)Cl]<sub>2</sub> (56 mg, 0.12 mmol) in THF (2 mL) and a freshly prepared solution of P(*p*-anisyl)<sub>3</sub> (250 mg, 0.72 mmol) in THF (2 mL). The tube was flushed with argon, sealed and heated at 120 °C for 4-5 h, when <sup>1</sup>H NMR analysis indicated the full conversion of the silyl ether. The solvent was then removed under reduced pressure and the crude mixture was purified by Kugelrohr distillation (135-140 °C, 0.1 mmHg) to afford **1a** (3.8 g, 76 % yield, 2 steps) as a colorless oil. This is a known compound and the spectroscopic data is in agreement with the literature.<sup>1</sup>

**<sup>1</sup>H NMR** (CDCl<sub>3</sub>, 600 MHz) δ 7.15 (d, *J* = 8.2 Hz, 1H), 7.06 (d, *J* = 2.7 Hz, 1H), 6.97 (dd, *J* = 2.4, 8.6 Hz, 1H), 5.10 (s, 2H), 3.84 (s, 3H), 1.26-1.21 (m, 2H), 1.04-1.00 (m, 12H).

**<sup>13</sup>C NMR** (CDCl<sub>3</sub>, 150 MHz) δ 158.4, 142.8, 133.4, 122.3, 116.1, 116.0, 72.1, 55.4, 17.0, 16.9, 13.0.

1,1-Diisopropyl-6-methyl-1,3-dihydrobenzo[*c*][1,2]oxasilole **1b**:

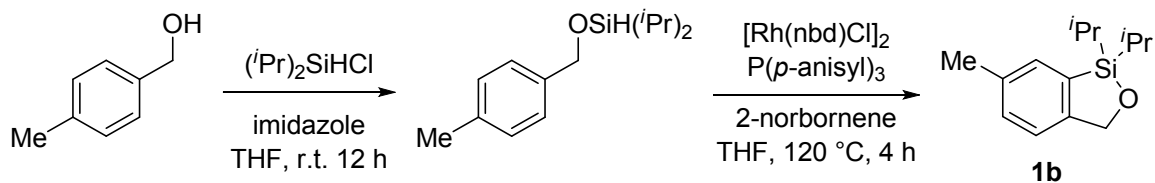

The synthesis of **1b** followed the synthesis of **1a** in smaller scale. Step 1: 4-methylbenzyl alcohol (1.22 g, 10 mmol), imidazole (1.36 g, 10 mmol), THF (20 mL) and (*i*Pr)<sub>2</sub>SiHCl (1.82 g, 2.0 mL, 12 mmol). Step 2: 2-norbornene (1.9 g, 20 mmol) in THF (3 mL), [Rh(nbd)Cl]<sub>2</sub> (28 mg, 0.06 mmol) in THF (1 mL) and P(*p*-anisyl)<sub>3</sub> (126 mg, 0.36 mmol) in

THF (1 mL). The crude mixture was purified by Kugelrohr distillation (120 °C, 0.1 mmHg) to afford **1b** (1.8 g, 77 % yield, 2 steps) as a colorless oil. This is a known compound and the spectroscopic data is in agreement with the literature.<sup>1</sup>

**<sup>1</sup>H NMR** (CDCl<sub>3</sub>, 400MHz) δ 7.38 (s, 1H), 7.22 (dd, *J* = 0.9, 7.8 Hz, 1H), 7.14-7.12 (m, 1H), 5.12 (s, 2H), 2.39 (s, 1H), 1.29-1.17 (m, 2H), 1.05-1.01 (m, 12H).

**<sup>13</sup>C NMR** (CDCl<sub>3</sub>, 101MHz) δ 147.9, 135.8, 132.4, 131.8, 130.5, 121.2, 72.3, 21.2, 17.0, 13.1.

1,1-Diisopropyl-*N,N*-dimethyl-1,3-dihydrobenzo[*c*][1,2]oxasilol-6-amine **1c**:

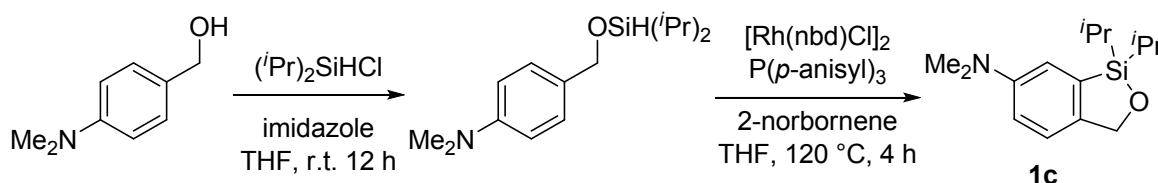

The synthesis of **1c** followed the synthesis of **1a** in smaller scale. Step 1: 4-dimethylaminobenzyl alcohol (1.5 g, 10 mmol), imidazole (1.36 g, 10 mmol), THF (20 mL) and (iPr)<sub>2</sub>SiHCl (1.82 g, 2.0 mL, 12 mmol). Step 2: 2-norbornene (1.9 g, 20 mmol) in THF (3 mL), [Rh(nbd)Cl]<sub>2</sub> (28 mg, 0.06 mmol) in THF (1 mL) and P(*p*-anisyl)<sub>3</sub> (126 mg, 0.36 mmol) in THF (1 mL). The crude mixture was purified by Kugelrohr distillation (147 °C, 0.1 mmHg) followed by column chromatography to afford **1c** (1.7 g, 65 % yield, 2 steps) as a colorless oil. This is a known compound and the spectroscopic data is in agreement with the literature.<sup>1</sup>

**<sup>1</sup>H NMR** (CDCl<sub>3</sub>, 600 MHz) δ 7.11 (d, *J* = 8.2 Hz, 1H), 6.90 (d, *J* = 2.7 Hz, 1H), 6.86 (dd, *J* = 2.7, 8.2 Hz, 1H), 5.08 (s, 2H), 2.97 (s, 6H), 1.25-1.21 (m, 2H), 1.06-1.02 (m, 12H).

**<sup>13</sup>C NMR** (CDCl<sub>3</sub>, 150 MHz) δ 149.5, 139.0, 132.6, 121.8, 115.3, 115.2, 72.1, 41.1, 17.1, 17.0, 13.1.

6-Fluoro-1,1-diisopropyl-1,3-dihydrobenzo[*c*][1,2]oxasilole **1d**:

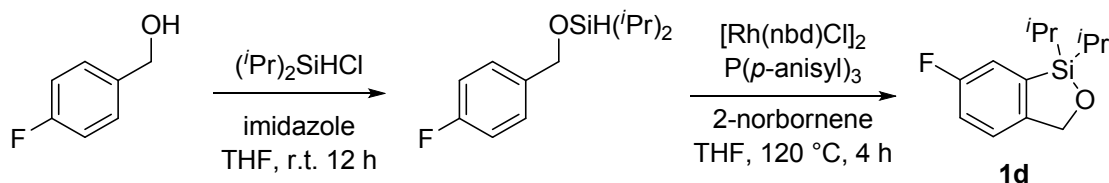

The synthesis of **1d** followed the synthesis of **1a** in smaller scale. Step 1: 4-fluorobenzyl alcohol (1.1, 8.8 mmol), imidazole (1.23 g, 18 mmol), THF (20 mL) and  $(i\text{Pr})_2\text{SiHCl}$  (1.6 g, 1.8 mL, 10.6 mmol). Step 2: 2-norbornene (1.7 g, 17.6 mmol) in THF (3 mL),  $[\text{Rh}(\text{nbd})\text{Cl}]_2$  (25 mg, 0.05 mmol) in THF (1 mL) and  $\text{P}(p\text{-anisyl})_3$  (110 mg, 0.32 mmol) in THF (1 mL). The crude mixture was purified by Kugelrohr distillation (110 °C, 0.1 mmHg) to afford **1d** (1.3 g, 60 % yield, 2 steps) as a colorless oil. This is a known compound and the spectroscopic data is in agreement with the literature.<sup>1</sup>

**<sup>1</sup>H NMR** ( $\text{CDCl}_3$ , 400MHz)  $\delta$  7.22-7.17 (m, 2H), 7.09-7.06 (m, 1H), 5.11 (s, 2H), 1.28-1.19 (m, 2H), 1.07-0.97 (m, 12H).

**<sup>13</sup>C NMR** ( $\text{CDCl}_3$ , 101MHz)  $\delta$  162.0 (d,  $J = 246.4$  Hz), 146.0 (d,  $J = 3.0$  Hz), 134.5 (d,  $J = 5.8$  Hz), 122.9 (d,  $J = 7.7$  Hz), 117.8 (d,  $J = 19.2$  Hz), 116.9 (d,  $J = 23$  Hz), 72.0, 16.9, 16.8, 13.0.

6-Chloro-1,1-diisopropyl-1,3-dihydrobenzo[c][1,2]oxasilole **1e**:

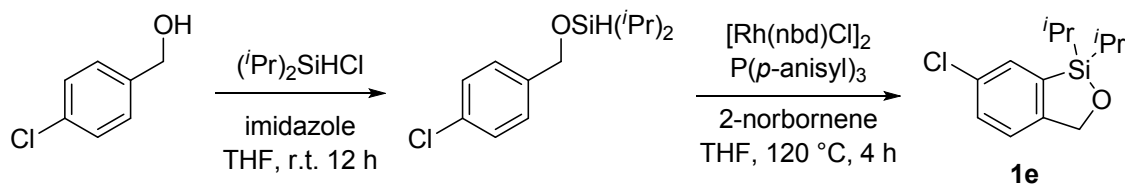

The synthesis of **1e** followed the synthesis of **1a** in smaller scale. Step 1: 4-chlorobenzyl alcohol (1.43 g, 10 mmol), imidazole (1.36 g, 10 mmol), THF (20 mL) and  $(i\text{Pr})_2\text{SiHCl}$  (1.82 g, 2.0 mL, 12 mmol). Step 2: 2-norbornene (1.9 g, 20 mmol) in THF (3 mL),  $[\text{Rh}(\text{nbd})\text{Cl}]_2$  (28 mg, 0.06 mmol) in THF (1 mL) and  $\text{P}(p\text{-anisyl})_3$  (126 mg, 0.36 mmol) in THF (1 mL). The crude mixture was purified by Kugelrohr distillation (125 °C, 0.1 mmHg) followed by column chromatography ( $\text{EtOAc}:\text{n-Hexane} = 5:95$ ) to afford **1e** (1.3 g, 51 % yield, 2 steps) as a colorless oil. This is a known compound and the spectroscopic data is in agreement with the literature.<sup>1</sup>

**<sup>1</sup>H NMR** (CDCl<sub>3</sub>, 400 MHz) δ 7.51 (d, *J* = 1.8 Hz, 1H), 7.36 (dd, *J* = 2.1, 8.0 Hz, 1H), 7.17 (d, *J* = 7.8 Hz, 1H), 5.10 (s, 2H), 1.28-1.21 (m, 2H), 1.07-1.00 (m, 12 H).

**<sup>13</sup>C NMR** (CDCl<sub>3</sub>, 150 MHz) δ 148.9, 134.6, 132.8, 131.5, 129.6, 122.9, 72.1, 16.9, 13.0.

1,1-Diisopropyl-5-methoxy-1,3-dihydrobenzo[*c*][1,2]oxasilole **1f**:

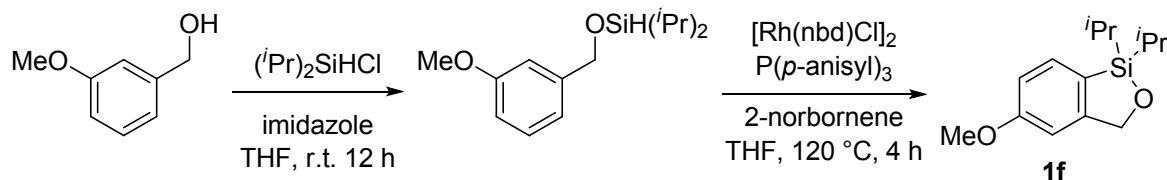

The synthesis of **1f** followed the synthesis of **1a** in smaller scale. Step 1: 3-methoxybenzyl alcohol (1.38 g, 10 mmol), imidazole (1.36 g, 10 mmol), THF (20 mL) and (*i*Pr)<sub>2</sub>SiHCl (1.82 g, 2.0 mL, 12 mmol). Step 2: 2-norbornene (1.9 g, 20 mmol) in THF (3 mL), [Rh(nbd)Cl]<sub>2</sub> (28 mg, 0.06 mmol) in THF (1 mL) and P(*p*-anisyl)<sub>3</sub> (126 mg, 0.36 mmol) in THF (1 mL). The crude mixture was purified by Kugelrohr distillation (130 °C, 0.1 mmHg) to afford **1e** (1.7 g, 68 % yield, 2 steps) as a colorless oil. This is a known compound and the spectroscopic data is in agreement with the literature.<sup>1</sup>

**<sup>1</sup>H NMR** (CDCl<sub>3</sub>, 600 MHz) δ 7.47 (d, *J* = 8.2 Hz, 1H), 6.88 (d, *J* = 7.6 Hz, 1H), 6.76 (s, 1H), 5.11 (s, 2H), 3.83 (s, 3H), 1.24-1.12 (m, 2H), 1.03-0.99 (m, 12H).

**<sup>13</sup>C NMR** (CDCl<sub>3</sub>, 150 MHz) δ 161.3, 153.0, 133.1, 122.5, 113.8, 106.2, 72.3, 55.1, 16.99, 16.97, 13.1.

1,1-Diisopropyl-4-methoxy-1,3-dihydrobenzo[*c*][1,2]oxasilole **1g**:

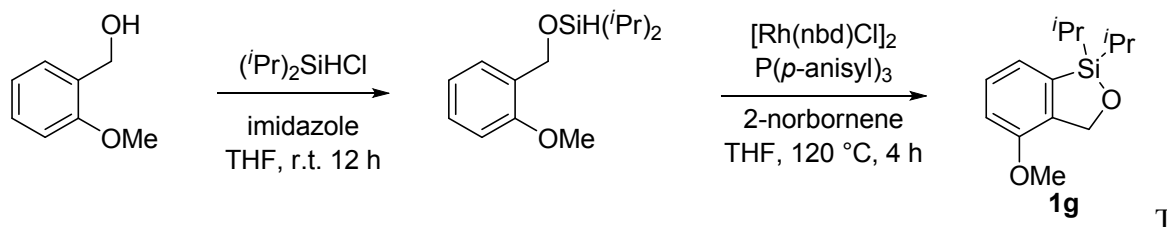

The synthesis of **1g** followed the synthesis of **1a** in smaller scale. Step 1: 2-methoxybenzyl alcohol (1.38 g, 10 mmol), imidazole (1.36 g, 10 mmol), THF (20 mL) and (*i*Pr)<sub>2</sub>SiHCl (1.82 g, 2.0 mL, 12 mmol). Step 2: 2-norbornene (1.9 g, 20 mmol) in THF (3 mL),

[Rh(nbd)Cl]<sub>2</sub> (28 mg, 0.06 mmol) in THF (1 mL) and P(*p*-anisyl)<sub>3</sub> (126 mg, 0.36 mmol) in THF (1 mL). The crude mixture was purified by Kugelrohr distillation (125 °C, 0.1 mmHg) to afford **1e** (1.5 g, 60 % yield, 2 steps) as a colorless oil. This is a known compound and the spectroscopic data is in agreement with the literature.<sup>1</sup>

<sup>1</sup>H NMR (CDCl<sub>3</sub>, 600 MHz) δ 7.30 (t, *J* = 7.6 Hz, 1H), 7.14 (d, *J* = 6.9 Hz, 1H), 6.87 (d, *J* = 7.6 Hz, 1H), 5.11 (s, 2H), 3.84 (s, 3H), 1.24-1.20 (m, 2H), 1.04-1.00 (m, 12H).

<sup>13</sup>C NMR (CDCl<sub>3</sub>, 150 MHz) δ 154.2, 138.9, 133.7, 128.3, 123.7, 110.4, 70.4, 54.8, 16.9, 13.1.

1,1-Diisopropyl-4-methyl-1,3-dihydrobenzo[*c*][1,2]oxasilole **1h**:

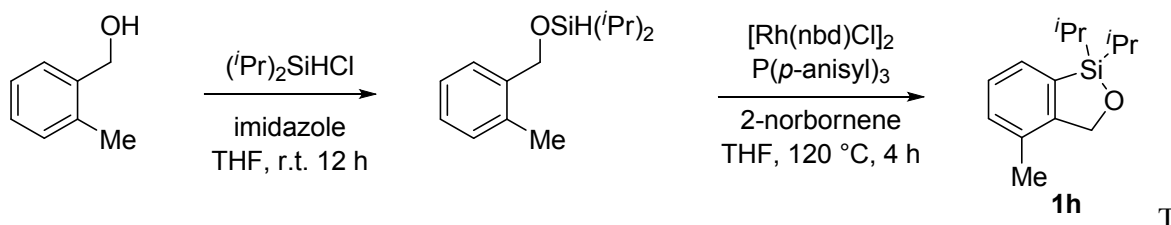

The synthesis of **1h** followed the synthesis of **1a** in smaller scale. Step 1: 2-methylbenzyl alcohol (1.22 g, 10 mmol), imidazole (1.36 g, 10 mmol), THF (20 mL) and (iPr)<sub>2</sub>SiHCl (1.82 g, 2.0 mL, 12 mmol). Step 2: 2-norbornene (1.9 g, 20 mmol) in THF (3 mL), [Rh(nbd)Cl]<sub>2</sub> (28 mg, 0.06 mmol) in THF (1 mL) and P(*p*-anisyl)<sub>3</sub> (126 mg, 0.36 mmol) in THF (1 mL). The crude mixture was purified by Kugelrohr distillation (120 °C, 0.1 mmHg) to afford **1b** (1.4 g, 60 % yield, 2 steps) as a colorless oil.

<sup>1</sup>H NMR (CDCl<sub>3</sub>, 400MHz) δ 7.49 (d, *J* = 7.3 Hz, 1H), 7.34-7.25 (m, 2H), 5.17 (s, 2H), 2.30 (s, 3H), 1.36-1.28 (m, 2H), 1.15-1.09 (m, 12H).

<sup>13</sup>C NMR (CDCl<sub>3</sub>, 150 MHz) δ 149.1, 131.4, 130.6, 129.5, 126.8, 71.8, 18.1, 17.0, 13.1.

**DART-MS** *m/z* calcd for C<sub>14</sub>H<sub>23</sub>OSi [M+H]<sup>+</sup>: 235.15182, found: 235.15219

**IR** (KBr, cm<sup>-1</sup>) *v*: 2944, 284, 1462, 1211, 1074, 1049, 989, 881, 778, 694.

3,3-Diisopropyl-1,3-dihydronaphtho[2,1-*c*][1,2]oxasilole **1i**:

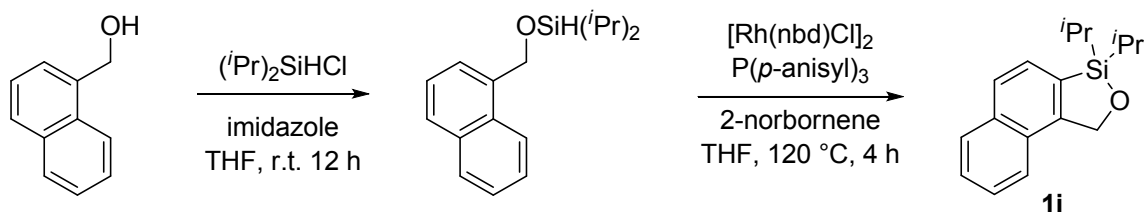

The synthesis of **1i** followed the synthesis of **1a** in smaller scale. Step 1: 1-naphthalenemethanol (1.58 g, 10 mmol), imidazole (1.36 g, 10 mmol), THF (20 mL) and  $(i\text{Pr})_2\text{SiHCl}$  (1.82 g, 2.0 mL, 12 mmol). Step 2: 2-norbornene (1.9 g, 20 mmol) in THF (3 mL),  $[\text{Rh}(\text{nbd})\text{Cl}]_2$  (28 mg, 0.06 mmol) in THF (1 mL) and  $\text{P}(p\text{-anisyl})_3$  (126 mg, 0.36 mmol) in THF (1 mL). The crude mixture was purified by column chromatography (EtOAc:*n*-Hexane = 5:95) followed by Kugelrohr distillation (200 °C, 0.1 mmHg) to afford **1i** (1.7 g, 63% yield, 2 steps) as a colorless oil. This is a known compound and the spectroscopic data is in agreement with the literature.<sup>1</sup>

**<sup>1</sup>H NMR** ( $\text{CDCl}_3$ , 600 MHz)  $\delta$  7.94 - 7.92 (m, 1H), 7.80 (d,  $J$  = 8.2 Hz, 1H), 7.73-7.71 (m, 1H), 7.64-7.62 (m, 1H), 7.57-7.54 (m, 2H), 5.61 (s, 2H), 1.34-1.29 (m, 2H), 1.08-1.04 (m, 12H).

**<sup>13</sup>C NMR** ( $\text{CDCl}_3$ , 150 MHz)  $\delta$  148.3, 134.0, 129.3, 128.6, 127.9, 127.9, 127.1, 126.5, 126.2, 122.9, 71.9, 17.1, 17.0, 13.2.

1,1-Diisopropyl-3,6-dimethyl-1,3-dihydrobenzo[*c*][1,2]oxasilole **1j**:

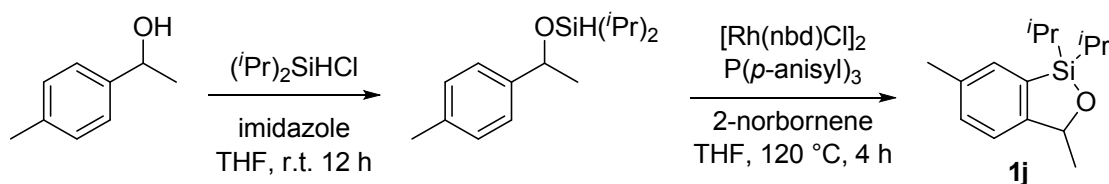

The synthesis of **1j** followed the synthesis of **1a** in smaller scale. Step 1: 1-(4-methylphenyl)ethanol (1.36 g, 10 mmol), imidazole (1.36 g, 10 mmol), THF (20 mL) and  $(i\text{Pr})_2\text{SiHCl}$  (1.82 g, 2.0 mL, 12 mmol). Step 2: 2-norbornene (1.9 g, 20 mmol) in THF (3 mL),  $[\text{Rh}(\text{nbd})\text{Cl}]_2$  (28 mg, 0.06 mmol) in THF (1 mL) and  $\text{P}(p\text{-anisyl})_3$  (126 mg, 0.36 mmol) in THF (1 mL). The crude mixture was purified by Kugelrohr distillation (130 °C,



0.1 mmHg) followed by column chromatography (EtOAc:*n*-Hexane = 5:95) to afford **1j** (1.0 g, 40% yield, 2 steps) as a colorless oil.

**<sup>1</sup>H NMR** (CDCl<sub>3</sub>, 400 MHz) δ 7.34 (s, 1H), 7.22 (d, *J* = 7.8 Hz, 1H), 7.10 (d, *J* = 8.2 Hz, 1H), 5.30 (q, *J* = 6.3 Hz, 1H), 2.39 (s, 3H), 1.50 (d, *J* = 6.9 Hz, 3H), 1.26-1.15 (m, 2H), 1.07-0.96 (m, 12H).

**<sup>13</sup>C NMR** (CDCl<sub>3</sub>, 101MHz) δ 152.5, 135.9, 132.3, 131.8, 130.6, 121.8, 78.1, 24.9, 21.2, 17.4, 17.3, 17.0, 17.0, 13.2, 12.5.

**DART-MS** *m/z* calcd for C<sub>15</sub>H<sub>25</sub>OSi [M+H]<sup>+</sup>: 249.16747, found: 249.16632

**IR** (KBr, cm<sup>-1</sup>) ν: 2946, 2865, 1464, 1085, 925, 880, 792, 670, 635, 494.

1,1-Diisopropyl-5-methoxy-3-methyl-1,3-dihydrobenzo[*c*][1,2]oxasilole **1k**:

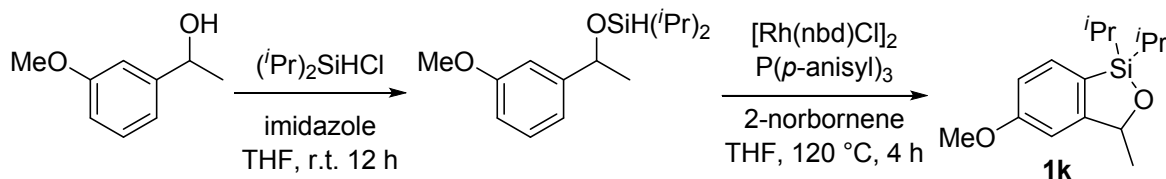

The synthesis of **1k** followed the synthesis of **1a** in smaller scale. Step 1: 1-(3-methoxyphenyl)ethanol (1.50 g, 10 mmol), imidazole (1.36 g, 10 mmol), THF (20 mL) and (iPr)<sub>2</sub>SiHCl (1.82 g, 2.0 mL, 12 mmol). Step 2: 2-norbornene (1.9 g, 20 mmol) in THF (3 mL), [Rh(nbd)Cl]<sub>2</sub> (28 mg, 0.06 mmol) in THF (1 mL) and P(*p*-anisyl)<sub>3</sub> (126 mg, 0.36 mmol) in THF (1 mL). The crude mixture was purified by Kugelrohr distillation (130 °C, 0.1 mmHg) followed by column chromatography (EtOAc:*n*-Hexane = 5:95) to afford **1k** (1.58 g, 60% yield, 2 steps) as a colorless oil.

**<sup>1</sup>H NMR** (CDCl<sub>3</sub>, 400MHz) δ 7.45 (d, *J* = 8.2 Hz, 1H), 6.87 (dd, *J* = 2.1, 8.0 Hz, 1H), 6.73 (s, 1H), 5.28 (q, *J* = 6.4 Hz, 1H), 3.84 (s, 3H), 1.51 (d, *J* = 6.4 Hz, 3H), 1.22-1.17 (m, 2H), 1.06-0.97 (m, 12H).

**<sup>13</sup>C NMR** (CDCl<sub>3</sub>, 101MHz) δ 161.3, 157.4, 133.0, 122.4, 113.5, 107.2, 78.1, 55.1, 24.8, 17.3, 17.2, 17.0, 16.9, 13.2, 12.5.

**DART-MS** *m/z* calcd for C<sub>15</sub>H<sub>25</sub>O<sub>2</sub>Si [M+H]<sup>+</sup>: 265.16238, found: 265.16109

IR (KBr,  $\text{cm}^{-1}$ )  $\nu$ : 2945, 2864, 1600, 1465, 1306, 1239, 1071, 881, 786, 677.

(R)-1,1-Diisopropyl-5-methoxy-3-methyl-1,3-dihydrobenzo[c][1,2]oxasilole (R)-1k:

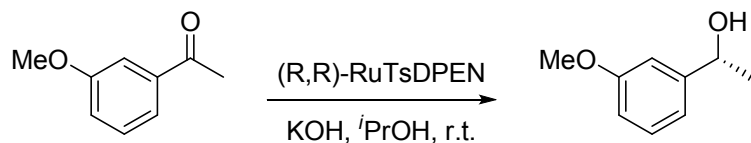

Synthesis of chiral alcohol: In a 300 mL 3 neck round bottom flask was charged (R,R)-RuTsDPEN (127 mg, 0.2 mmol). An argon balloon was attached and isopropanol (200 mL) was added followed by 3'-methoxyacetophenone (3.0 g, 20 mmol) and a solution of KOH (28 mg) in isopropanol (20 mL). The reaction was stirred at room temperature for 3 days, then quenched with HCl (1N, 1 mL) and the solvent was removed. Brine (50 mL) was added and the mixture was extracted to EtOAc. Removal of solvent followed by column chromatography afforded the chiral alcohol (2 g, 66%) with 94% ee (HPLC, OD-H, *i*PrOH:*n*-Hexane = 2:98, 1 mL/min).

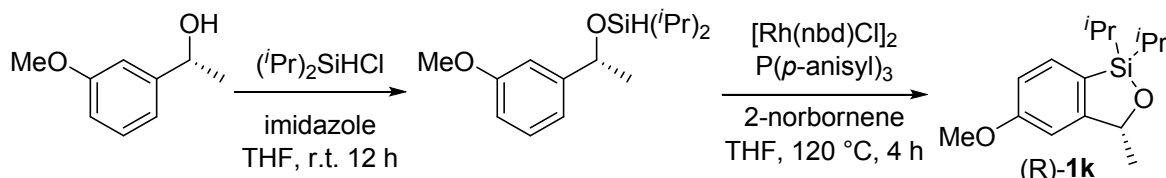

The chiral alcohol was then used for the synthesis of (R)-1k following the same procedure for the synthesis of 1k. Yield: 1.7 g (65%) colorless oil.

1,1-Diisopropyl-4-methoxy-3-methyl-1,3-dihydrobenzo[c][1,2]oxasilole 1l:

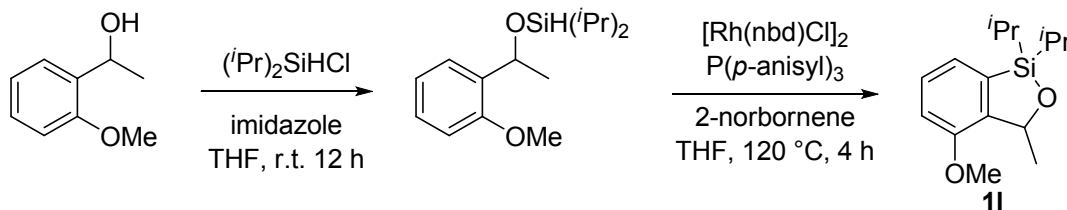

The synthesis of 1l followed the synthesis of 1a in smaller scale. Step 1: 1-(2-methoxyphenyl)ethanol (1.50 g, 10 mmol), imidazole (1.36 g, 10 mmol), THF (20 mL) and  $(i\text{Pr})_2\text{SiHCl}$  (1.82 g, 2.0 mL, 12 mmol). Step 2: 2-norbornene (1.9 g, 20 mmol) in THF (3 mL),  $[\text{Rh}(\text{nbd})\text{Cl}]_2$  (28 mg, 0.06 mmol) in THF (1 mL) and  $\text{P}(p\text{-anisyl})_3$  (126 mg, 0.36

mmol) in THF (1 mL). The crude mixture was purified by Kugelrohr distillation (130 °C, 0.1 mmHg) followed by column chromatography (EtOAc:*n*-Hexane = 5:95) to afford **11** (2.0 g, 76% yield, 2 steps) as a colorless oil.

**<sup>1</sup>H NMR** (CDCl<sub>3</sub>, 400MHz) δ 7.29-7.25 (m, 1H), 7.09 (d, *J* = 6.9 Hz, 1H), 6.86 (d, *J* = 7.8 Hz, 1H), 5.38 (q, *J* = 6.3 Hz, 1H), 3.82 (s, 3H), 1.53 (d, *J* = 6.4 Hz, 3H), 1.25-0.87 (m, 14H).

**<sup>13</sup>C NMR** (CDCl<sub>3</sub>, 101MHz) δ 154.4, 142.9, 133.8, 128.5, 123.7, 111.1, 77.2, 54.8, 23.4, 17.4, 17.4, 17.0, 13.2, 12.6.

**DART-MS** *m/z* calcd for C<sub>15</sub>H<sub>25</sub>O<sub>2</sub>Si [M+H]<sup>+</sup>: 265.16238, found: 265.16170

**IR** (KBr, cm<sup>-1</sup>) ν: 2943, 2866, 1568, 1464, 1255, 1078, 1053, 1024, 927, 880, 803, 685.

*Synthesis of benzoxasiloles **1n-w***

1,1,3-Trimethyl-1,3-dihydrobenzo[*c*][1,2]oxasilole **1n**:

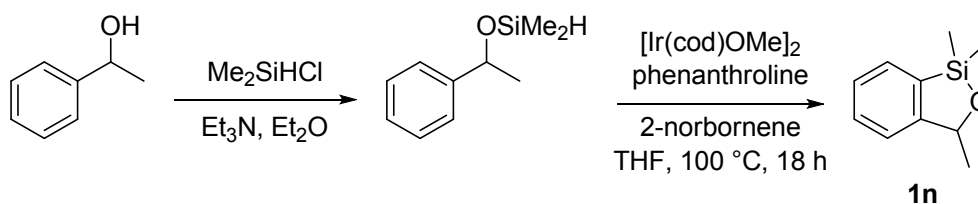

**Step 1:** In a 200 mL 2 neck round bottom flask equipped with a 20 mL dropping funnel and an argon balloon, to the solution of ClMe<sub>2</sub>SiH (2.8 g, 3.3 mL, 30 mmol) in Et<sub>2</sub>O (70 mL) at 0 °C was added dropwise a solution of 1-phenylethanol (2.44 g, 20 mmol), Et<sub>3</sub>N (4.0 g, 40 mmol) in Et<sub>2</sub>O (20 mL). A white precipitate appeared immediately. The mixture was stirred at 0 °C for 20 mins and at room temperature for 16 h. Then, it was diluted with Et<sub>2</sub>O (50 mL), washed quickly with saturated NaHCO<sub>3</sub> and brine, and dried over Na<sub>2</sub>SO<sub>4</sub>. Et<sub>2</sub>O was then removed under reduced pressure to afford the silyl ether which was directly used for the next step.

**Step 2:** Inside and argon glovebox, a 100 mL Schlenck tube was successively charged with a solution of the silyl ether in THF (20 mL), 2-norbornene (2.3 g, 24 mmol) in THF (20 mL), [Ir(cod)(OMe)]<sub>2</sub> (60 mg, 0.092 mmol) and phenanthroline (48 mg, 0.25 mmol). The

flask was sealed, taken out of glovebox, stirred at room temperature for 1 h and 100 °C for 16 h upon which  $^1\text{H}$  NMR analysis showed full conversion of the silyl ether. The solvent was then removed under reduced pressure and the crude mixture was purified using Kugelrohr distillation (125-130 °C, 40 mmHg) to afford **1n** (2.6 g, 73 % yield, 2 steps) as a colorless oil. This is a known compound and the spectroscopic data is in agreement with the literature.<sup>3</sup>

**$^1\text{H}$  NMR** ( $\text{CDCl}_3$ , 500 MHz)  $\delta$  7.57 (d,  $J$  = 7.4 Hz, 1H), 7.41 (t,  $J$  = 7.4 Hz, 1H), 7.31 (t,  $J$  = 7.5 Hz, 1H), 7.22 (d,  $J$  = 8.0 Hz, 1H), 5.34 (q,  $J$  = 6.6 Hz, 1H), 1.52 (d,  $J$  = 6.9 Hz, 3H), 0.42 (s, 3H), 0.38 (s, 3H).

**$^{13}\text{C}$  NMR** ( $\text{CDCl}_3$ , 125 MHz)  $\delta$  154.3, 135.0, 130.8, 129.6, 126.9, 122.1, 77.8, 25.2, 1.6, 0.4.

(R)-1,1,3-Trimethyl-1,3-dihydrobenzo[*c*][1,2]oxasilole (R)-**1n**:

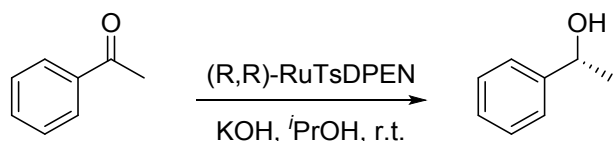

The chiral alcohol was prepared via asymmetric transfer hydrogenation as described in the synthesis of (R)-**1k**. Yield: 1.6 g (66%) colorless oil, 94% ee (HPLC: OD-H,  $i\text{PrOH}/n\text{-Hexane}$  = 2:98, 1 mL/min).

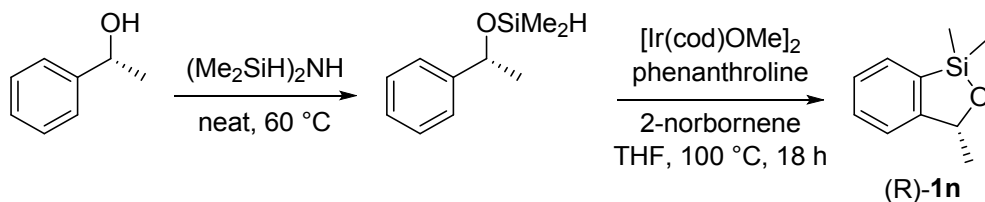

Step 1: The chiral alcohol (1.22 g, 10 mmol) was treated with  $(\text{Me}_2\text{SiH})_2\text{NH}$  (1.14 mL, 6.6 mmol) at 60 °C overnight. Excess silylating reagent was removed under reduced pressure.

Step 2: Inside and argon glovebox, a 100 mL Schlenk tube was successively charged with a solution of the silyl ether in THF (10 mL), 2-norbornene (1.15 g, 12 mmol) in THF (10 mL),  $[\text{Ir}(\text{cod})(\text{OMe})_2]$  (30 mg, 0.046 mmol) and phenanthroline (24 mg, 0.125 mmol). The flask was sealed, taken out of glovebox, stirred at room temperature for 1 h and 100 °C for

16 h upon which  $^1\text{H}$  NMR analysis showed full conversion of the silyl ether. The solvent was then removed under reduced pressure and the crude mixture was purified using Kugelrohr distillation to afford (R)-**1n** (1.25 g, 70% yield, 2 steps) as a colorless oil.

6-Methoxy-1,1,3-trimethyl-1,3-dihydrobenzo[c][1,2]oxasilole **1o**:

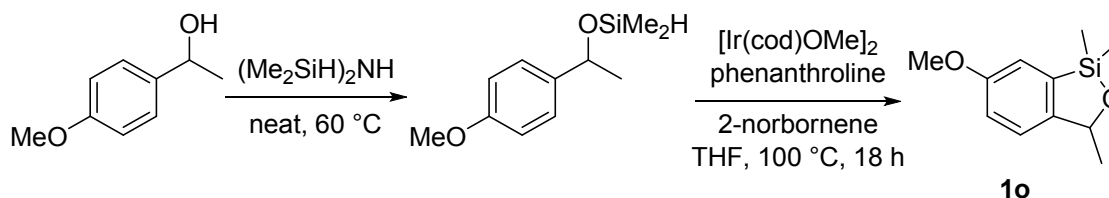

The synthesis of **1o** followed the synthesis of (R)-**1m**. Step 1: 1-(4-methoxyphenyl)ethanol (1.50 g, 10 mmol),  $(\text{Me}_2\text{SiH})_2\text{NH}$  (1.14 mL, 6.6 mmol). Step 2: silyl ether in THF (10 mL), 2-norbornene (1.15 g, 12 mmol) in THF (10 mL),  $[\text{Ir}(\text{cod})(\text{OMe})_2]$  (30 mg, 0.046 mmol) and phenanthroline (23 mg, 0.125 mmol). The crude mixture was purified by Kugelrohr distillation (130 °C, 0.1 mmHg) to afford **1o** (1.2 g, 57% yield, 2 steps) as a colorless oil.

$^1\text{H}$  NMR ( $\text{CDCl}_3$ , 400 MHz)  $\delta$  7.14 (d,  $J$  = 8.7 Hz, 1H), 7.05 (d,  $J$  = 2.7 Hz, 1H), 6.99-6.96 (m, 1H), 5.30 (q,  $J$  = 6.4 Hz, 1H), 3.85 (s, 3H), 1.50 (d,  $J$  = 6.4 Hz, 3H), 0.42 (s, 3H), 0.38 (s, 3H).

$^{13}\text{C}$  NMR ( $\text{CDCl}_3$ , 100 MHz)  $\delta$  158.7, 146.5, 136.6, 123.1, 116.6, 114.3, 77.4, 55.4, 25.4, 1.5, 0.3.

**DART-MS**  $m/z$  calcd for  $\text{C}_{11}\text{H}_{17}\text{O}_2\text{Si}$   $[\text{M}+\text{H}]^+$ : 209.09978, found: 209.09951

**IR** (KBr,  $\text{cm}^{-1}$ )  $\nu$ : 2968, 1471, 1286, 1228, 1082, 927, 880, 823, 789.

6-Chloro-1,1,3-trimethyl-1,3-dihydrobenzo[c][1,2]oxasilole **1p**:

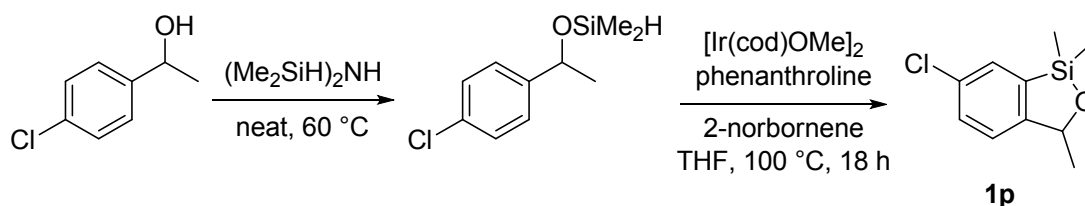

The synthesis of **1p** followed the synthesis of (R)-**1m**. Step 1: 1-(4-chlorophenyl)ethanol (1.56 g, 10 mmol), (Me<sub>2</sub>SiH)<sub>2</sub>NH (1.14 mL, 6.6 mmol). Step 2: silyl ether in THF (10 mL), 2-norbornene (1.15 g, 12 mmol) in THF (10 mL), [Ir(cod)(OMe)]<sub>2</sub> (30 mg, 0.046 mmol) and phenanthroline (23 mg, 0.125 mmol). The crude mixture was purified by Kugelrohr distillation (110 °C, 0.1 mmHg) afford **1p** (1.6 g, 76% yield, 2 steps) as a colorless oil.

**<sup>1</sup>H NMR** (CDCl<sub>3</sub>, 400 MHz) δ 7.51 (d, *J* = 1.8 Hz, 1H), 7.36 (dd, *J* = 1.8, 8.2 Hz, 1H), 7.14 (d, *J* = 8.2 Hz, 1H), 5.30 (q, *J* = 6.4 Hz, 1H), 1.49 (d, *J* = 6.4 Hz, 3H), 0.42 (s, 3H), 0.38 (s, 3H).

**<sup>13</sup>C NMR** (CDCl<sub>3</sub>, 100 MHz) δ 152.5, 137.7, 133.1, 130.5, 129.7, 123.6, 77.5, 25.2, 1.4, 0.3.

**DART-MS** *m/z* calcd for C<sub>10</sub>H<sub>14</sub>ClOSi [M+H]<sup>+</sup>: 213.05024, found: 213.05015.

**IR** (KBr, cm<sup>-1</sup>) *v*: 2972, 2871, 1451, 1254, 1091, 928, 791.

6-Iodo-1,1,3-trimethyl-1,3-dihydrobenzo[*c*][1,2]oxasilole **1q**

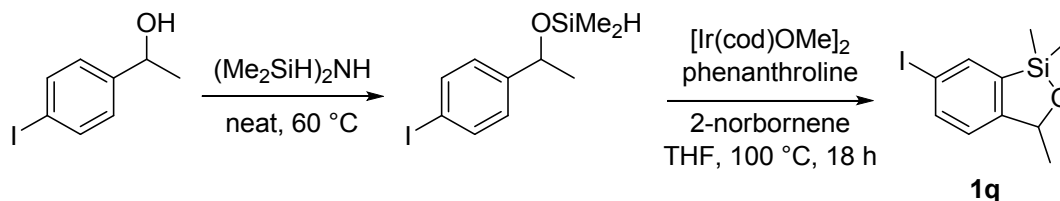

The synthesis of **1q** followed the synthesis of (R)-**1m** in a smaller scale. Step 1: 1-(4-iodophenyl)ethanol (1.24 g, 5 mmol), (Me<sub>2</sub>SiH)<sub>2</sub>NH (0.57 mL, 3.3 mmol). Step 2: silyl ether in THF (5 mL), 2-norbornene (0.57 g, 6 mmol) in THF (5 mL), [Ir(cod)(OMe)]<sub>2</sub> (15 mg, 0.023 mmol) and phenanthroline (12 mg, 0.063 mmol). The crude mixture was purified by Kugelrohr distillation (130-140 °C, 0.1 mmHg) afford **1q** (0.9 g, 60% yield, 2 steps) as a colorless oil.

**<sup>1</sup>H NMR** (CDCl<sub>3</sub>, 400 MHz) δ 7.89 (s, 1H), 7.70 (d, *J* = 7.8 Hz, 1H), 6.99 (d, *J* = 8.2, 1H), 5.30-5.27 (m, 1H), 1.48 (d, *J* = 6.4 Hz, 3H), 0.41 (s, 3H), 0.37 (s, 3H).

**<sup>13</sup>C NMR** (CDCl<sub>3</sub>, 100 MHz) δ 153.7, 139.6, 138.8, 138.3, 124.3, 93.5, 77.5, 25.1, 1.5, 0.3.

**DART-MS** *m/z* calcd for C<sub>10</sub>H<sub>14</sub>IOSi [M+H]<sup>+</sup>: 304.98586, found: 304.98595

**IR** (KBr,  $\text{cm}^{-1}$ )  $\nu$ : 2975, 2869, 1254, 1084, 1022, 927, 826, 790, 747.

6-Bromo-1,1,3-trimethyl-1,3-dihydrobenzo[c][1,2]oxasilole **1r**:

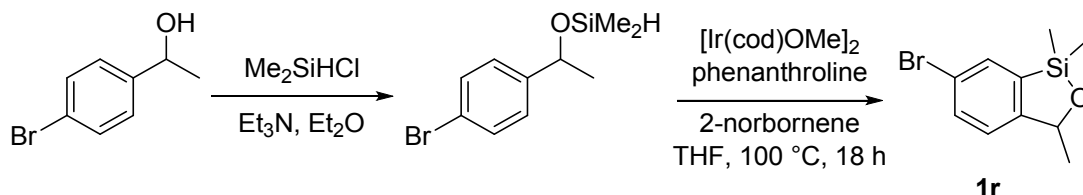

The synthesis of **1r** followed the synthesis of **1m**. Step 1: 1-(4-bromophenyl)ethanol (4.0 g, 20 mmol),  $\text{ClMe}_2\text{SiH}$  (2.8 g, 3.3 mL, 30 mmol),  $\text{Et}_3\text{N}$  (4 g, 40 mmol),  $\text{Et}_2\text{O}$  (70 + 20 mL). Step 2: silyl ether in THF (20 mL), 2-norbornene (2.3 g, 24 mmol) in THF (20 mL),  $[\text{Ir}(\text{cod})(\text{OMe})]_2$  (60 mg, 0.092 mmol) and phenanthroline (46 mg, 0.25 mmol). The crude mixture was purified by Kugelrohr distillation ( $125\text{--}130\text{ }^\circ\text{C}$ , 0.1 mmHg) to afford **1r** (3.4 g, 66% yield, 2 steps) as a colorless oil.

**$^1\text{H}$  NMR** ( $\text{CDCl}_3$ , 400 MHz)  $\delta$  7.66 (s, 1H), 7.51 (d,  $J = 8.2$  Hz, 1H), 7.09 (d,  $J = 8.2$  Hz, 1H), 5.28 (q,  $J = 6.4$  Hz, 1H), 1.49 (d,  $J = 6.4$  Hz, 3H), 0.42 (s, 3H), 0.38 (s, 3H).

**$^{13}\text{C}$  NMR** ( $\text{CDCl}_3$ , 100 MHz)  $\delta$  = 153.0, 138.3, 133.5, 132.5, 124.0, 121.5, 77.5, 25.1, 1.5, 0.3.

**DART-MS**  $m/z$  calcd for  $\text{C}_{10}\text{H}_{14}\text{BrOSi}$   $[\text{M}+\text{H}]^+$ : 256.99973, found: 256.99873

**IR** (KBr,  $\text{cm}^{-1}$ )  $\nu$ : 2971, 2869, 1254, 1084, 1023, 928, 857, 827, 791, 420.

5-Bromo-1,1,3-trimethyl-1,3-dihydrobenzo[c][1,2]oxasilole **1s**:

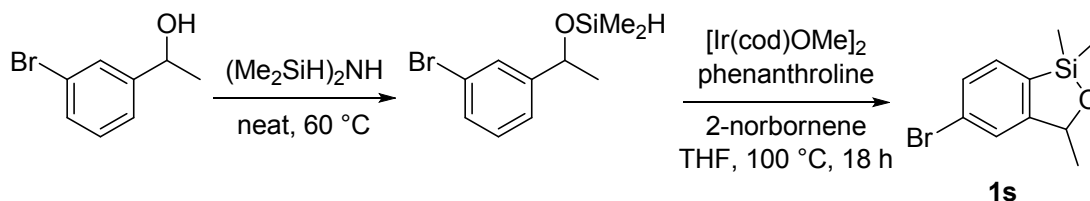

The synthesis of **1s** followed the synthesis of (R)-**1m**. Step 1: 1-(3-bromophenyl)ethanol (2.0 g, 10 mmol),  $(\text{Me}_2\text{SiH})_2\text{NH}$  (1.14 mL, 6.6 mmol). Step 2: silyl ether in THF (10 mL), 2-norbornene (1.15 g, 12 mmol) in THF (10 mL),  $[\text{Ir}(\text{cod})(\text{OMe})]_2$  (30 mg, 0.046 mmol)

and phenanthroline (23 mg, 0.125 mmol). The crude mixture was purified by Kugelrohr distillation (130 °C, 0.1 mmHg) afford **1s** (1.6 g, 62% yield, 2 steps) as a colorless oil.

**<sup>1</sup>H NMR** (CDCl<sub>3</sub>, 400 MHz) δ 7.45-7.37 (m, 3H), 5.29 (q, *J* = 6.7 Hz, 1H), 1.50 (d, *J* = 6.4 Hz, 3H), 0.41 (s, 3H), 0.37 (s, 3H).

**<sup>13</sup>C NMR** (CDCl<sub>3</sub>, 100 MHz) δ 156.6, 133.8, 132.3, 130.1, 125.5, 124.5, 77.3, 25.1, 1.5, 0.3.

**DART-MS** *m/z* calcd for C<sub>10</sub>H<sub>14</sub>BrOSi [M+H]<sup>+</sup>: 256.99973, found: 256.99966

**IR** (KBr, cm<sup>-1</sup>) ν: 2971, 2875, 1254, 1190, 1088, 1025, 931, 857, 824, 789.

3-Isopropyl-1,1-dimethyl-1,3-dihydrobenzo[*c*][1,2]oxasilole **1t**

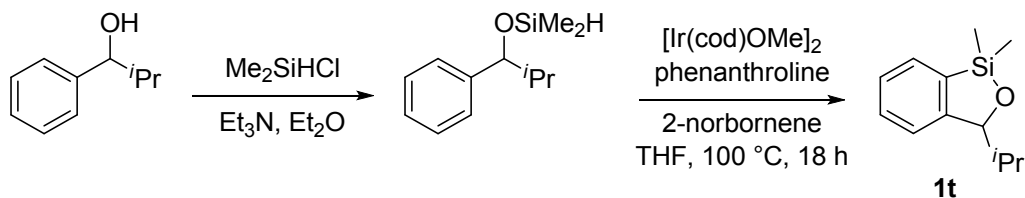

The synthesis of **1s** followed the synthesis of **1m**. Step 1: 2-methyl-1-phenylpropan-1-ol (3.0 g, 20 mmol), ClMe<sub>2</sub>SiH (2.8 g, 3.3 mL, 30 mmol), Et<sub>3</sub>N (4 g, 40 mmol), Et<sub>2</sub>O (70 + 20 mL). Step 2: silyl ether in THF (20 mL), 2-norbornene (2.3 g, 24 mmol) in THF (20 mL), [Ir(cod)(OMe)]<sub>2</sub> (60 mg, 0.092 mmol) and phenanthroline (46 mg, 0.25 mmol). The crude mixture was purified by Kugelrohr distillation (90 °C, 0.1 mmHg) to afford **1t** (2.6 g, 63% yield, 2 steps) as a colorless oil. This is a known compound and the spectroscopic data is in agreement with the literature.<sup>3</sup>

**<sup>1</sup>H NMR** (CDCl<sub>3</sub>, 400 MHz) δ 7.56 (d, *J* = 7.3 Hz, 1H), 7.40 (t, *J* = 7.4 Hz, 1H), 7.30 (t, *J* = 7.4 Hz, 1H), 7.21 (d, *J* = 7.8 Hz, 1H), 5.18 (s, 1H), 2.14-2.11 (m, 1H), 1.18 (d, *J* = 6.9 Hz, 3H), 0.60 (d, *J* = 6.9 Hz, 3H), 0.42 (s, 3H), 0.37 (s, 3H).

**<sup>13</sup>C NMR** (CDCl<sub>3</sub>, 100 MHz) δ 152.3, 136.2, 130.7, 129.5, 126.8, 122.2, 86.3, 34.4, 20.3, 14.8, 0.8, 0.7.

1,1-Dimethyl-3-phenyl-1,3-dihydrobenzo[*c*][1,2]oxasilole **1u**:



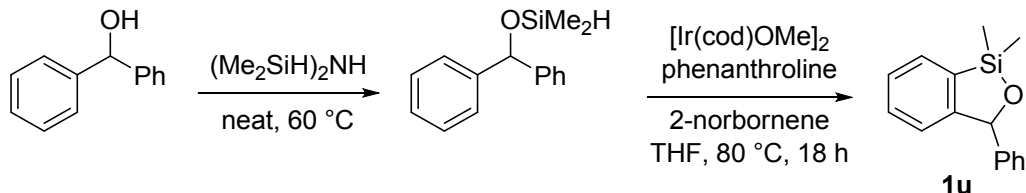

The synthesis of **1u** followed the synthesis of (R)-**1m** with slight modification. Step 1: benzhydrol (1.84 g, 10 mmol),  $(\text{Me}_2\text{SiH})_2\text{NH}$  (1.14 mL, 6.6 mmol). Step 2: silyl ether in THF (10 mL), 2-norbornene (1.15 g, 12 mmol) in THF (10 mL),  $[\text{Ir}(\text{cod})(\text{OMe})]_2$  (30 mg, 0.046 mmol) and phenanthroline (23 mg, 0.125 mmol). The reaction was heated at 80 °C. The crude mixture was purified by Kugelrohr distillation (140 °C, 0.1 mmHg) afford **1u** (1.4 g, 58% yield, 2 steps) as a white solid. This is a known compound and the spectroscopic data is in agreement with the literature.<sup>3</sup>

**<sup>1</sup>H NMR** ( $\text{CDCl}_3$ , 500 MHz)  $\delta$  7.62-7.61 (m, 1H), 7.33-7.26 (m, 7H), 7.03-7.02 (m, 1H), 6.16 (s, 1H), 0.53 (s, 3H), 0.45 (s, 3H).

**<sup>13</sup>C NMR** ( $\text{CDCl}_3$ , 101 MHz)  $\delta$  152.4, 143.7, 135.1, 130.6, 129.8, 128.5, 127.8, 127.1, 127.1, 123.7, 84.0, 1.2, 0.5.

#### 1,1,3,3-Tetramethyl-1,3-dihydrobenzo[c][1,2]oxasilole **1w**

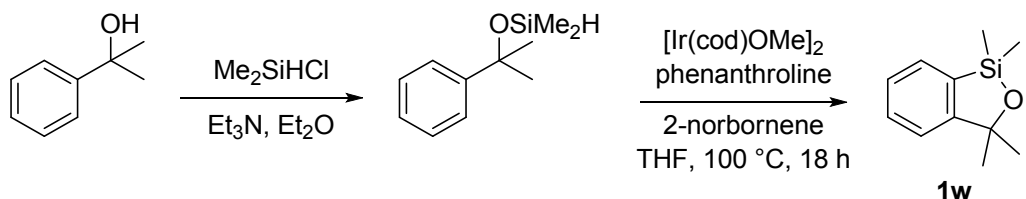

The synthesis of **1w** followed the synthesis of **1m**. Step 1: 2-phenyl-2-propanol (2.72 g, 20 mmol),  $\text{ClMe}_2\text{SiH}$  (2.8 g, 3.3 mL, 30 mmol),  $\text{Et}_3\text{N}$  (4 g, 40 mmol),  $\text{Et}_2\text{O}$  (70 + 20 mL). Step 2: silyl ether in THF (20 mL), 2-norbornene (2.3 g, 24 mmol) in THF (20 mL),  $[\text{Ir}(\text{cod})(\text{OMe})]_2$  (60 mg, 0.092 mmol) and phenanthroline (46 mg, 0.25 mmol). The crude mixture was purified by Kugelrohr distillation (140 °C, 40 mmHg) to afford **1w** (2.3 g, 60% yield, 2 steps) as a white solid. This is a known compound and the spectroscopic data is in agreement with the literature.<sup>3</sup>

**<sup>1</sup>H NMR** (CDCl<sub>3</sub>, 400MHz) δ 7.55 (d, *J* = 6.9 Hz, 1H), 7.43-7.40 (m, 1H), 7.33-7.29 (m, 1H), 7.24 (d, *J* = 7.8 Hz, 1 H), 1.55 (s, 6 H), 0.40 (s, 6 H).

**<sup>13</sup>C NMR** (CDCl<sub>3</sub>, 101 MHz) δ 157.9, 134.5, 130.7, 129.7, 126.8, 122.1, 83.4, 32.1, 1.2.

### Synthesis of **1x-y**

#### 1,1-Diisopropyl-4,5,6-trimethoxy-3-methyl-1,3-dihydrobenzo[c][1,2]oxasilole **1x**:

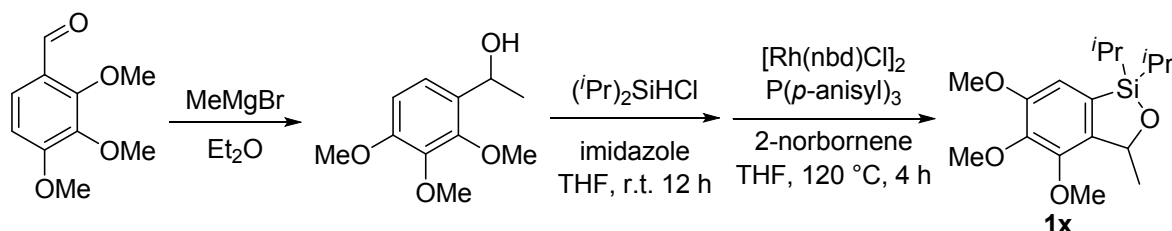

Synthesis of 1-(2,3,4-trimethoxyphenyl)ethanol: To a solution of the 2,3,4-trimethoxybenzaldehyde (2.9 g, 15 mmol) in Et<sub>2</sub>O (10 mL) was added MeMgBr (3 M in Et<sub>2</sub>O, 6.3 mL) dropwise. The mixture was then heated to reflux for 2 h, cooled to room temperature and quenched with saturated NH<sub>4</sub>Cl solution. The mixture was extracted with Et<sub>2</sub>O (3 x 20 mL). The combined organic phase was washed with NaHCO<sub>3</sub>, brine, dried over Na<sub>2</sub>SO<sub>4</sub> and the solvent was removed under reduced pressure. The alcohol was obtained after column chromatography. Yield 2.2 g (69%) colorless oil.

The synthesis of **1x** followed the synthesis of **1a** in smaller scale. Step 1: 1-(2,3,4-trimethoxyphenyl)ethanol (2.12 g, 10 mmol), imidazole (1.36 g, 10 mmol), THF (20 mL) and (iPr)<sub>2</sub>SiHCl (1.82 g, 2.0 mL, 12 mmol). Step 2: 2-norbornene (1.9 g, 20 mmol) in THF (3 mL), [Rh(nbd)Cl]<sub>2</sub> (28 mg, 0.06 mmol) in THF (1 mL) and P(*p*-anisyl)<sub>3</sub> (126 mg, 0.36 mmol) in THF (1 mL). The crude mixture was purified by Kugelrohr distillation (170°C, 0.1 mmHg) to afford **1x** (1.7 g, 52% yield, 2 steps) as a colorless oil.

**<sup>1</sup>H NMR** (CDCl<sub>3</sub>, 600 MHz) δ 6.73 (s, 1H), 5.34 (q, *J* = 6.2 Hz, 1H), 3.91 (s, 3H), 3.90 (s, 3H), 3.89 (s, 3H), 1.52 (d, *J* = 6.9 Hz, 3H), 1.23-1.11 (m, 2H), 1.08 (dd, *J* = 3.1, 7.2 Hz, 6H), 0.97 (t, *J* = 7.2 Hz, 6H).

**<sup>13</sup>C NMR** (CDCl<sub>3</sub>, 150 MHz) δ 153.5, 148.4, 143.4, 140.5, 127.0, 109.0, 60.7, 60.4, 56.2, 24.3, 17.4, 17.4, 17.0, 17.0, 13.2, 12.6.

**DART-MS**  $m/z$  calcd for  $C_{17}H_{29}O_4Si$   $[M+H]^+$ : 325.18351, found: 325.18327

**IR** (KBr,  $cm^{-1}$ )  $\nu$ : 2942, 2865, 1588, 1557, 1468, 1398, 1296, 1238, 1193, 1120, 1093, 1050, 1022

1,1-Diisopropyl-4-methoxy-5-methyl-6-(tetrahydro-2H-pyran-2-yloxy)-1,3-dihydrobenzo[c][1,2]oxasilole **1x**:

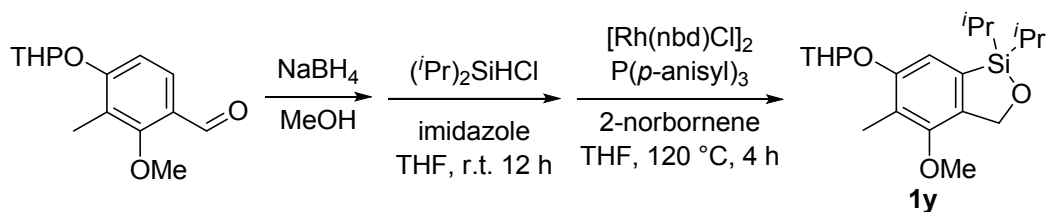

The aldehyde starting material was prepared according to literature.<sup>4</sup>

Reduction of the aldehyde: A 50 mL round bottom flask was charged with the aldehyde (2.5 g, 10 mmol) and MeOH (20 mL) and cooled to  $0\text{ }^\circ\text{C}$  in an ice-water bath.  $NaBH_4$  (760 mg, 20 mmol) was added in portions. After the addition was completed, the reaction was stirred at room temperature overnight before quenching with acetone. The solvent was removed and water (30 mL) was added and the mixture was extracted to EtOAc (3 x 15 mL). The combined organic solvent was washed with brine (2 x 20 mL), dried over  $Na_2SO_4$ . Removal of the solvent afforded the benzyl alcohol which was directly used in the next step.

The synthesis of **1y** followed the synthesis of **1a** in smaller scale. Step 1: imidazole (1.36 g, 10 mmol), THF (20 mL) and  $(iPr)_2SiHCl$  (1.82 g, 2.0 mL, 12 mmol). Step 2: 2-norbornene (1.9 g, 20 mmol) in THF (3 mL),  $[Rh(nbd)Cl]_2$  (28 mg, 0.06 mmol) in THF (1 mL) and  $P(p-anisyl)_3$  (126 mg, 0.36 mmol) in THF (1 mL). The crude mixture was purified by column chromatography to afford **1y** (2.7 g, 74% yield, 3 steps) as a slight yellow oil.

**$^1H$  NMR** ( $CDCl_3$ , 600 MHz)  $\delta$  7.04 (s, 1H), 5.44 (br. s., 1H), 5.14 (s, 2H), 3.94 (t,  $J = 10.7$  Hz, 1H), 3.74 (s, 3H), 3.63-3.62 (m, 1H), 2.23 (s, 3H), 2.06-2.03 (m, 1H), 1.91-1.89 (m, 2H), 1.74-1.62 (m, 3H), 1.24-1.18 (m, 2H), 1.04-0.99 (m, 12H).

**$^{13}C$  NMR** ( $CDCl_3$ , 150 MHz)  $\delta$  155.8, 153.5, 136.0, 130.8, 122.3, 112.7, 96.7, 70.0, 62.0, 60.0, 30.7, 25.3, 18.9, 17.0, 17.0, 17.0, 16.9, 13.1, 13.1, 9.2.

**DART-MS** m/z calcd for C<sub>20</sub>H<sub>31</sub>O<sub>4</sub>Si [M-H]<sup>+</sup>: 363.19916, found: 363.20035

**IR** (KBr, cm<sup>-1</sup>) v: 2943, 2864, 1461, 1403, 1280, 1125, 1089, 1052, 1020, 961, 880, 787, 673.

## Part II: Optimization and Control Experiments

*Experimental Procedure for the reaction of 1a and CO<sub>2</sub> (Table 1):* In an argon glove box, a flame-dried 10 mL two neck tube was charged with CuI (7.6 mg, 0.04 mmol) and CsF (182 mg, 1.2 mmol). The tube was taken out and attached to a vacuum line and a CO<sub>2</sub> balloon using a three-way stopcock. After three evacuation-CO<sub>2</sub> refill cycles was conducted, DMSO (1.6 mL) and **1a** (100 mg, 0.4 mmol) were added successively. The tube was then immersed in a pre-heated oil bath at 60 °C and stirred vigorously for 20 h. After being cooled down, the reaction mixture was diluted with H<sub>2</sub>O (5 mL), acidified using HCl 1N (4 mL), stirred for another 2 h and extracted to EtOAc (3 x 10 mL). The combined organic phase was washed with H<sub>2</sub>O (2 x 15 mL), dried over Na<sub>2</sub>SO<sub>4</sub> and the solvent was removed under reduced pressure. The crude mixture was analyzed by <sup>1</sup>H NMR in CDCl<sub>3</sub> using 1,3,5-trimethoxybenzene (22.4 mg) as the internal standard. The results were shown in Table 1.

*Screening different fluoride salts:*

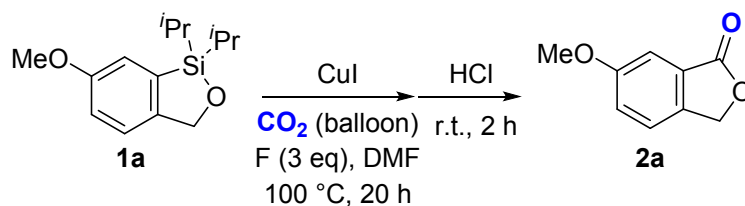

| Entry | Fluoride             | Yield(%) <sup>a</sup> |
|-------|----------------------|-----------------------|
| 1     | CsF                  | 67                    |
| 2     | AgF                  | n.d.                  |
| 3     | KF                   | 45                    |
| 4     | KF.2H <sub>2</sub> O | n.d.                  |
| 5     | TBAT <sup>b</sup>    | 28                    |

<sup>a</sup> Yields were determined by <sup>1</sup>H NMR analysis

<sup>b</sup> Tetrabutylammonium difluorotriphenylsilicate.

*Control Experiments for the carboxylation of PhSiMe<sub>3</sub> and PhSi(OMe)<sub>3</sub>:* In an argon glove box, a flame-dried 10 mL two neck tube was charged with CuI (10 mg, 0.05 mmol) and

CsF (228 mg, 1.5 mmol). The tube was taken out and attached to a vacuum line and a CO<sub>2</sub> balloon using a three-way stopcock. After three evacuation-CO<sub>2</sub> refill cycles was conducted, DMSO (2 mL) and PhSiMe<sub>3</sub> (75 mg, 0.5 mmol) or PhSi(OMe)<sub>3</sub> were added successively. The tube was then immersed in a pre-heated oil bath at 60 °C and stirred vigorously for 20 h. After being cooled down to 0 °C in an ice-water bath, the reaction mixture was diluted with H<sub>2</sub>O (5 mL), acidified using HCl 1N (2 mL) and extracted to EtOAc (3 x 10 mL). The combined organic phase was washed with H<sub>2</sub>O (2 x 15 mL), dried over Na<sub>2</sub>SO<sub>4</sub> and the solvent was removed under reduced pressure. The crude mixture was analyzed by <sup>1</sup>H NMR in CDCl<sub>3</sub> using 1,3,5-trimethoxybenzene (22.4 mg) as the internal standard. The reaction using PhSi(OMe)<sub>3</sub> yielded benzoic acid (45%) while the reaction of PhSiMe<sub>3</sub> did not.

*Control Experiments for the carboxylation of benzoxaboroles*

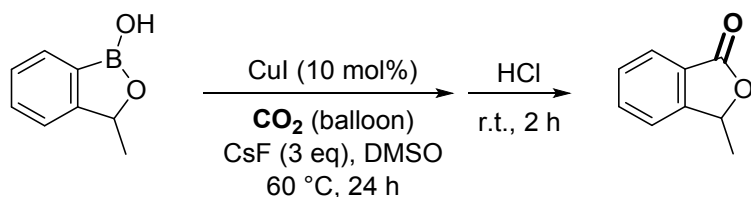

In an argon glove box, a flame-dried 10 mL two neck tube was charged with CuI (10 mg, 0.05 mmol), CsF (228 mg, 1.5 mmol) and the substrate (75 mg, 0.5 mmol). The tube was taken out and attached to a vacuum line and a CO<sub>2</sub> balloon using a three-way stopcock. After three evacuation-CO<sub>2</sub> refill cycles was conducted, DMSO (2 mL) was added. The tube was then immersed in a pre-heated oil bath at 60 °C and stirred vigorously for 20 h. After being cooled down to 0 °C in an ice-water bath, the reaction mixture was diluted with H<sub>2</sub>O (5 mL), acidified using HCl 1N (2 mL), stirred for another 2 h and extracted to EtOAc (3 x 10 mL). The combined organic phase was washed with H<sub>2</sub>O (2 x 15 mL), dried over Na<sub>2</sub>SO<sub>4</sub> and the solvent was removed under reduced pressure. The crude mixture was analyzed by <sup>1</sup>H NMR in CDCl<sub>3</sub> using 1,3,5-trimethoxybenzene (22.4 mg) as the internal standard. The desired phthalide was not detected.

*Control Experiments for the carboxylation of benzoxaboroles under reported condition:*

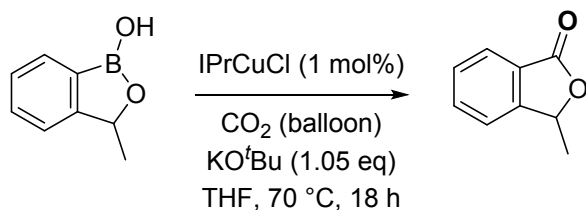

To a 10 mL 2-neck tube was added the substrate (74 mg, 0.5 mmol) and IPrCuCl (2.4 mg, 0.005 mmol). THF (2 mL) was then added, followed by a solution of KO<sup>t</sup>Bu (60 mg, 0.525 mmol) in THF (0.5 mL). A CO<sub>2</sub> balloon was attached and the mixture was stirred at 70 °C for 18 h. The work-up was followed the above procedure. The desired phthalide was not detected.

### Part III: Substrate Scope for the Carboxylation of Benzoxasiloles

#### *Carboxylation of substrate 1a-m*

##### 6-Methoxyisobenzofuran-1(3H)-one **2a**:

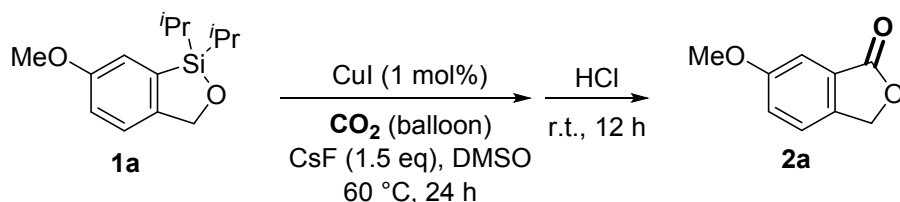

In an argon glove box, a flame-dried 20 or 30 mL two neck tube was charged with CuI (2 mg, 0.01 mmol) and CsF (228 mg, 1.5 mmol). The tube was taken out and attached to a vacuum line and a CO<sub>2</sub> balloon using a three-way stopcock. After three evacuation-CO<sub>2</sub> refill cycles was conducted, DMSO (4 mL) and **1a** (250 mg, 1 mmol) were added successively. The tube was then immersed in a pre-heated oil bath at 60 °C and stirred vigorously for 24 h. After being cooled down, the reaction mixture was diluted with H<sub>2</sub>O (5 mL), acidified using HCl 1N (8 mL), stirred for another 12 h and extracted to EtOAc (3 x 15 mL). The combined organic phase was washed with H<sub>2</sub>O (2 x 15 mL), dried over Na<sub>2</sub>SO<sub>4</sub> and the solvent was removed under reduced pressure. The pure product was obtained using pTLC in DCM (the use of DCM as the eluent was necessary to separate the product from small amount of alcohol, the use of EtOAc:*n*-Hexane system was not

effective). Yield: 134 mg (82%) white solid. This is a known compound and the spectroscopic data is in agreement with the literature.<sup>5a</sup>

**<sup>1</sup>H NMR** (CDCl<sub>3</sub>, 600MHz)  $\delta$  7.37 (d,  $J$  = 8.2 Hz, 1H), 7.34 (d,  $J$  = 2.1 Hz, 1H), 7.25-7.23 (m, 1H), 5.26 (s, 2H), 3.87 (s, 3H).

**<sup>13</sup>C NMR** (CDCl<sub>3</sub> 151MHz)  $\delta$  171.1, 160.6, 138.8, 127.0, 123.0, 122.9, 107.5, 69.5, 55.7.

6-Methylisobenzofuran-1(3H)-one **2b**:

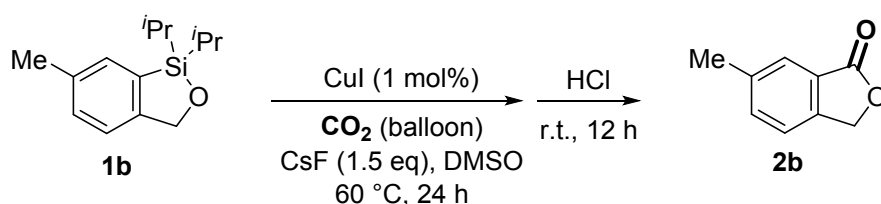

The synthesis of **2b** from **1b** (234 mg, 1 mmol) followed the synthesis of **2a**. Yield 114 mg (77%) white solid. This is a known compound and the spectroscopic data is in agreement with the literature.<sup>5b</sup>

**<sup>1</sup>H NMR** (CDCl<sub>3</sub>, 400MHz)  $\delta$  7.69 (s, 1H), 7.49 (d,  $J$  = 7.8 Hz, 1H), 7.38-7.36 (m, 1H), 5.27 (s, 2H), 2.46 (s, 3H).

**<sup>13</sup>C NMR** (CDCl<sub>3</sub>, 101MHz)  $\delta$  171.2, 143.8, 139.2, 135.1, 125.8, 125.6, 121.7, 69.5, 21.2.

6-(Dimethylamino)isobenzofuran-1(3H)-one **2c**:

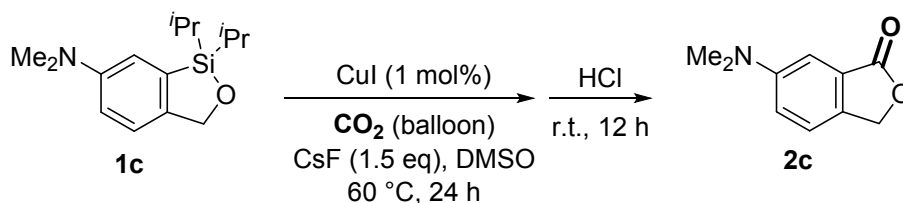

The synthesis of **2c** from **1c** (263 mg, 1 mmol) followed the synthesis of **2a** with slight modification. After the acidic quenching, the reaction was basified with NaOH 1N until pH > 10 before extraction. Yield 124 mg (72%) white solid. This is a known compound and the spectroscopic data is in agreement with the literature.<sup>5c</sup>

**<sup>1</sup>H NMR** (CDCl<sub>3</sub>, 600 MHz) δ 7.30 (d, *J* = 8.2 Hz, 1H), 7.11 (d, *J* = 2.3 Hz, 1H), 7.04 (dd, *J* = 2.3, 8.7 Hz, 1H), 5.22 (s, 2H), 3.01 (s, 6H).

**<sup>13</sup>C NMR** (CDCl<sub>3</sub>, 150 MHz) δ 172.1, 151.2, 133.9, 126.6, 122.3, 118.9, 106.9, 69.5, 40.6.

**6-Fluoroisobenzofuran-1(3H)-one 2d:**

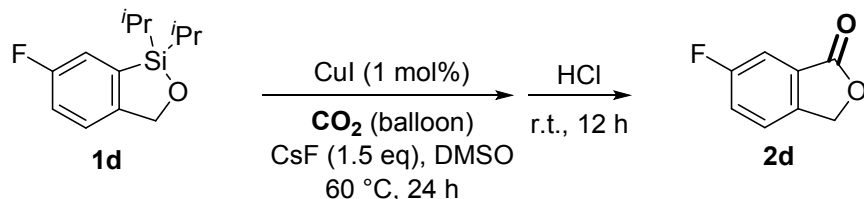

The synthesis of **2d** from **1d** (238 mg, 1 mmol) followed the synthesis of **2a**. Yield 117 mg (77%) white solid. M.p: 109-111 °C.

**<sup>1</sup>H NMR** (CDCl<sub>3</sub>, 400MHz) δ 7.56 (dd, *J* = 2.3, 7.3 Hz, 1H), 7.49 (dd, *J* = 4.4, 8.5 Hz, 1H), 7.43-7.38 (m, 1H), 5.31 (s, 2H).

**<sup>13</sup>C NMR** (CDCl<sub>3</sub>, 101MHz) δ 169.9 (d, *J* = 4.8 Hz), 163.0 (d, *J* = 246 Hz), 141.9 (d, *J* = 2.0 Hz), 127.7 (d, *J* = 8.6 Hz), 123.8 (d, *J* = 8.6 Hz), 122.0 (d, *J* = 24 Hz), 112.0 (d, *J* = 23 Hz), 69.4.

**DART-MS** *m/z* calcd for C<sub>8</sub>H<sub>6</sub>O<sub>2</sub>F [M+H]<sup>+</sup>: 153.03518, found: 153.03564

**IR** (KBr, cm<sup>-1</sup>) ν: 2355, 1763, 1626, 1493, 1463, 1363, 1311, 1269, 1244, 1195, 1112, 1045.

**6-Chloroisobenzofuran-1(3H)-one 2e:**

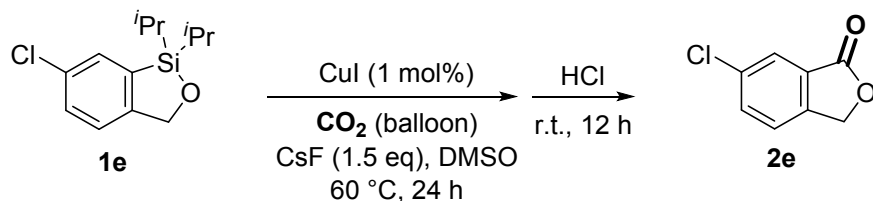

The synthesis of **2e** from **1e** (255 mg, 1 mmol) followed the synthesis of **2a**. Yield 135 mg (77%) white solid. This is a known compound and the spectroscopic data is in agreement with the literature.<sup>5b</sup>



**<sup>1</sup>H NMR** (CDCl<sub>3</sub>, 400MHz) δ 7.86 (s, 1H), 7.65 (dd, *J* = 1.8, 7.8 Hz, 1H), 7.46 (d, *J* = 8.2 Hz, 1H), 5.31 (s, 2H).

**<sup>13</sup>C NMR** (CDCl<sub>3</sub>, 101MHz) δ 169.6, 144.6, 135.3, 134.3, 127.5, 125.6, 123.4, 69.4.

5-Methoxyisobenzofuran-1(3H)-one **2f**:

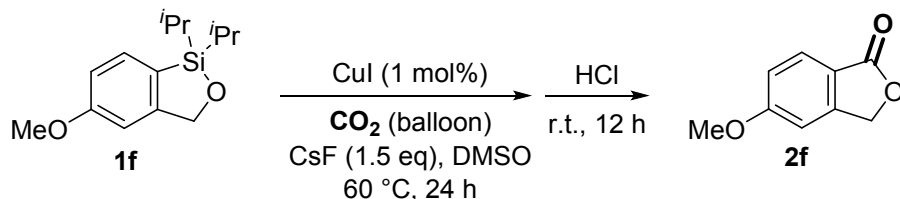

The synthesis of **2f** from **1f** (250 mg, 1 mmol) followed the synthesis of **2a**. Yield 110 mg (68%) white solid. This is a known compound and the spectroscopic data is in agreement with the literature.<sup>5b</sup>

**<sup>1</sup>H NMR** (CDCl<sub>3</sub>, 600 MHz) δ 7.81 (d, *J* = 8.9 Hz, 1H), 7.04 (d, *J* = 8.2 Hz, 1H), 6.92 (s, 1H), 5.25 (s, 2H), 3.90 (s, 3H).

**<sup>13</sup>C NMR** (CDCl<sub>3</sub>, 150 MHz) δ 170.8, 164.7, 149.3, 127.2, 118.0, 116.5, 106.0, 69.1, 55.8.

4-Methoxyisobenzofuran-1(3H)-one **2g**:

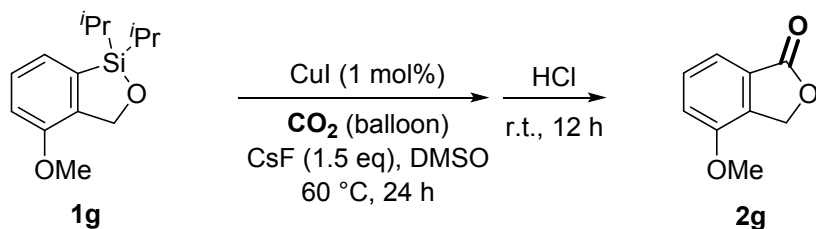

The synthesis of **2g** from **1g** (250 mg, 1 mmol) followed the synthesis of **2a**. Yield 124 mg (76%) white solid. This is a known compound and the spectroscopic data is in agreement with the literature.<sup>5d</sup>

**<sup>1</sup>H NMR** (CDCl<sub>3</sub>, 600 MHz) δ 7.48-7.47 (m, 2H), 7.11-7.09 (m, 1H), 5.24 (s, 2H), 3.91 (s, 3H).

**<sup>13</sup>C NMR** (CDCl<sub>3</sub>, 150 MHz) δ 171.1, 154.2, 134.9, 130.7, 127.3, 117.1, 114.7, 68.0, 55.5.

4-Methylisobenzofuran-1(3H)-one **2h**:

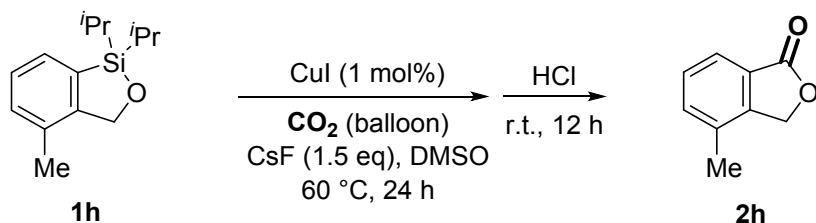

The synthesis of **2h** from **1h** (234 mg, 1 mmol) followed the synthesis of **2a**. Yield 114 mg (77%) white solid. This is a known compound and the spectroscopic data is in agreement with the literature.<sup>5c</sup>

**$^1\text{H}$  NMR** ( $\text{CDCl}_3$ , 400MHz)  $\delta$  7.73 (d,  $J$  = 6.9 Hz, 1H), 7.45-7.41 (m, 2H), 5.24 (s, 2H), 2.36 (s, 3H).

**$^{13}\text{C}$  NMR** ( $\text{CDCl}_3$ , 101MHz)  $\delta$  171.4, 145.4, 134.6, 132.3, 129.2, 125.3, 123.0, 69.0, 17.3.

Naphtho[1,2-c]furan-3(1H)-one **2i**:

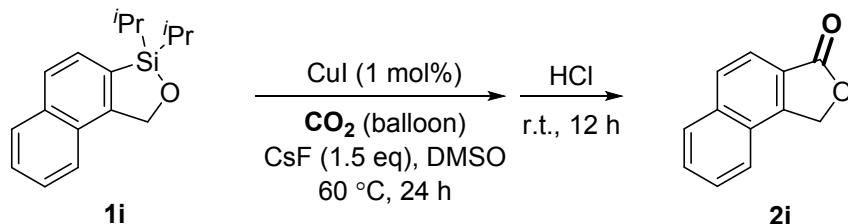

The synthesis of **2i** from **1i** (270 mg, 1 mmol) followed the synthesis of **2a**, but use  $\text{CuI}$  (20 mg, 0.1 mmol). Yield 117 mg (64%) white solid. M.p  $122\text{--}125^\circ\text{C}$

**$^1\text{H}$  NMR** ( $\text{CDCl}_3$ , 500 MHz)  $\delta$  8.00 (d,  $J$  = 7.9 Hz, 1H), 7.93 (d,  $J$  = 8.5 Hz, 1H), 7.81 (d,  $J$  = 8.5 Hz, 2H), 7.72 - 7.64 (m, 2H), 5.60 (s, 2H).

**$^{13}\text{C}$  NMR** ( $\text{CDCl}_3$ , 125 MHz)  $\delta$  171.6, 146.9, 135.8, 130.0, 129.2, 129.1, 127.8, 126.7, 123.4, 123.0, 120.4, 69.0.

**DART-MS**  $m/z$  calcd for  $\text{C}_{12}\text{H}_9\text{O}_2$   $[\text{M}+\text{H}]^+$ : 185.06025, found: 185.06043

**IR** ( $\text{KBr}$ ,  $\text{cm}^{-1}$ )  $\nu$ : 3050, 1752, 1633, 1593, 1521, 1456, 1395, 1338, 1252, 1083, 1019.

3,6-Dimethylisobenzofuran-1(3H)-one **2j**:

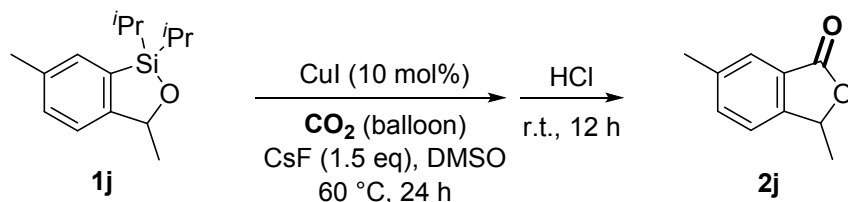

The synthesis of **2j** from **1j** (248 mg, 1 mmol) followed the synthesis of **2a**, but use  $\text{CuI}$  (20 mg, 0.1 mmol). Yield 133 mg (82%) yellow oil. This is a known compound and the spectroscopic data is in agreement with the literature.<sup>5f</sup>

**$^1\text{H}$  NMR** ( $\text{CDCl}_3$ , 400MHz)  $\delta$  7.69 (s, 1H), 7.49 (d,  $J = 7.8$  Hz, 1H), 7.32 (d,  $J = 7.8$  Hz, 1H), 5.53 (q,  $J = 6.4$  Hz, 1H), 2.47 (s, 3H), 1.61 (d,  $J = 6.9$  Hz, 3H).

**$^{13}\text{C}$  NMR** ( $\text{CDCl}_3$ , 101MHz)  $\delta$  170.6, 148.6, 139.3, 135.1, 125.9, 125.6, 121.2, 77.6, 21.2, 20.5.

5-Methoxy-3-methylisobenzofuran-1(3H)-one **2k**:

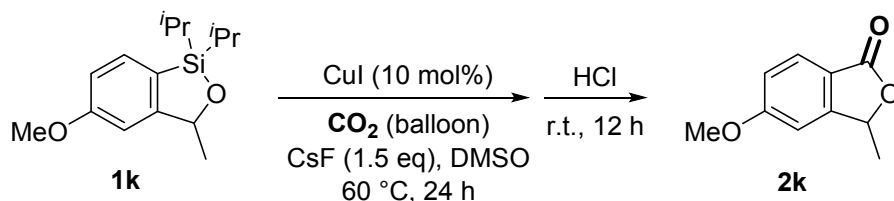

The synthesis of **2k** from **1k** (278 mg, 1 mmol) followed the synthesis of **2a**, but use  $\text{CuI}$  (20 mg, 0.1 mmol). Yield 148 mg (83%) yellow oil. This is a known compound and the spectroscopic data is in agreement with the literature.<sup>5f</sup>

**$^1\text{H}$  NMR** ( $\text{CDCl}_3$ , 400MHz)  $\delta$  7.77 (d,  $J = 8.2$  Hz, 1H), 7.02-7.00 (m, 1H), 6.85 (d,  $J = 2.3$  Hz, 1H), 5.47 (q,  $J = 6.9$  Hz, 1H), 3.90 (s, 3H), 1.60 (d,  $J = 6.4$  Hz, 3H).

**$^{13}\text{C}$  NMR** ( $\text{CDCl}_3$ , 101MHz)  $\delta$  170.1, 164.7, 153.9, 127.1, 118.0, 116.2, 105.6, 77.0, 55.8, 20.3.

(R)-5-Methoxy-3-methylisobenzofuran-1(3H)-one (R)-**2k**:

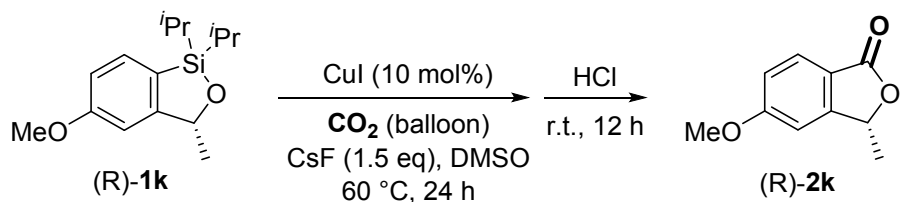

Yield 142 mg (80%) yellow solid, 94% ee (HPLC, OD-H, *i*PrOH:*n*-Hexane = 2:98, 1 mL/min).

4-Methoxy-3-methylisobenzofuran-1(3H)-one **2l**:

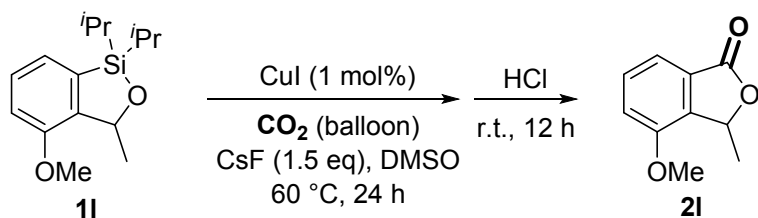

The synthesis of **2l** from **1l** (278 mg, 1 mmol) followed the synthesis of **2a**. Yield 140 mg (79%) white solid. M.p. 115-117 °C

<sup>1</sup>H NMR (CDCl<sub>3</sub>, 400MHz) δ 7.48-7.43 (m, 2H), 7.10 (dd, *J* = 1.8, 6.9 Hz, 1H), 5.54 (q, *J* = 6.4 Hz, 1H), 3.91 (s, 3H), 1.64 (d, *J* = 6.4 Hz, 3H).

<sup>13</sup>C NMR (CDCl<sub>3</sub>, 101 MHz) δ 170.4, 154.2, 138.9, 130.8, 127.5, 117.0, 114.9, 77.0, 55.5, 19.0.

**DART-MS** *m/z* calcd for C<sub>10</sub>H<sub>11</sub>O<sub>3</sub> [M+H]<sup>+</sup>: 179.07082, found: 179.07108

**IR** (KBr, cm<sup>-1</sup>) ν: 2987, 2939, 2841, 1757, 1607, 1490, 1445, 1357, 1357, 1308, 1274, 1187, 1118, 1047.

3-Hydroxy-4-methylisobenzofuran-1(3H)-one **2m**:

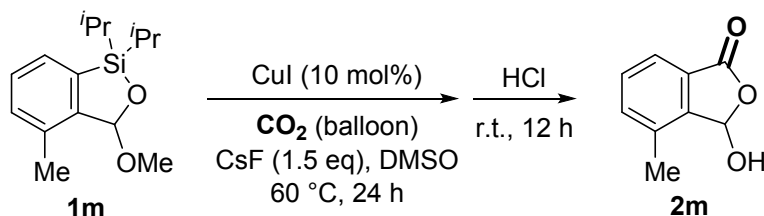

The synthesis of **2m** from **1m** (264 mg, 1 mmol)<sup>1b</sup> followed the synthesis of **2a**, with slight modification. The acidification step was conducted at 0 °C using HCl 2N (6 mL). PTLC was run using EtOAc:*n*-Hexane (1:1) as eluent. Yield 110 mg (68%) white solid. M.p. 123-126 °C

**<sup>1</sup>H NMR** (CD<sub>3</sub>OD, 600MHz) δ 7.64-7.62 (m, 1H), 7.47-7.44 (m, 2H), 6.59 (s, 1H), 4.36 (s, 1H), 2.44 (s, 3H).

**<sup>13</sup>C NMR** (CD<sub>3</sub>OD, 151MHz) δ 171.5, 146.9, 137.0, 136.3, 131.9, 128.1, 123.3, 99.7, 17.3.

**DART-MS** m/z calcd for C<sub>9</sub>H<sub>9</sub>O<sub>3</sub> [M+H]<sup>+</sup>: 165.05517, found: 165.05589

**IR** (KBr, cm<sup>-1</sup>) ν: 3358, 2959, 1747, 1602, 1485, 1433, 1357, 1310, 1261, 1206, 1103, 1063, 1032.

*Carboxylation of substrate 1n-w*

3-Methylisobenzofuran-1(3H)-one **2n**:

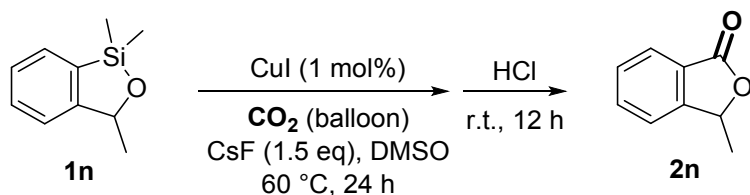

In an argon glove box, a flame-dried 20 or 30 mL two neck tube was charged with CuI (2 mg, 0.01 mmol) and CsF (228 mg, 1.5 mmol). The tube was taken out and attached to a vacuum line and a CO<sub>2</sub> balloon using a three-way stopcock. After three evacuation-CO<sub>2</sub> refill cycles was conducted, DMSO (4 mL) and **1n** (178 mg, 1 mmol) were added successively. The tube was then immersed in a pre-heated oil bath at 60 °C and stirred vigorously for 24 h. After being cooled down, the reaction mixture was diluted with H<sub>2</sub>O

(20 mL), NaOH 1N (4 mL), stirred for 1 h and washed with Et<sub>2</sub>O (3 x 10 mL). The aqueous phase was acidified using HCl 1N (12 mL), stirred for another 12 h and extracted to EtOAc (3 x 15 mL). The combined organic phase was washed with H<sub>2</sub>O (2 x 15 mL), dried over Na<sub>2</sub>SO<sub>4</sub> and the solvent was removed under reduced pressure to afford pure **2n**. Yield: 112 mg (76%) yellow oil. This is a known compound and the spectroscopic data is in agreement with the literature.<sup>5f</sup>

**<sup>1</sup>H NMR** (CDCl<sub>3</sub>, 400 MHz)  $\delta$  7.90 (d,  $J$  = 7.3 Hz, 1H), 7.69 (t,  $J$  = 7.8 Hz, 1H), 7.54 (t,  $J$  = 7.6 Hz, 1H), 7.45 (d,  $J$  = 7.3 Hz, 1H), 5.58 (q,  $J$  = 6.6 Hz, 1H), 1.65 (d,  $J$  = 6.9 Hz, 3H).

**<sup>13</sup>C NMR** (CDCl<sub>3</sub>, 100 MHz)  $\delta$  170.5, 151.2, 134.0, 129.0, 125.8, 125.7, 121.5, 77.7, 20.4.

(R)-3-Methylisobenzofuran-1(3H)-one (R)-**2n**:

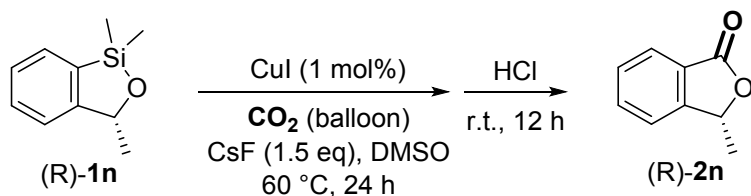

Yield 113 mg (76%) yellow solid, 94% ee (HPLC, OJ, <sup>i</sup>PrOH:*n*-Hexane = 2:98, 1 mL/min).

6-Methoxy-3-methylisobenzofuran-1(3H)-one **2o**:

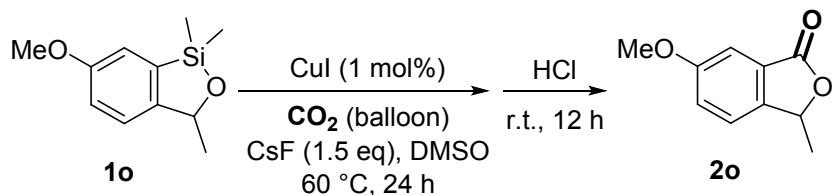

The synthesis of **2o** from **1o** (208 mg, 1 mmol) followed the synthesis of **2n**. Yield 134 mg (75%) yellow oil. This is a known compound and the spectroscopic data is in agreement with the literature.<sup>5h</sup>

**<sup>1</sup>H NMR** (CDCl<sub>3</sub>, 400 MHz)  $\delta$  7.33-7.31 (m, 2H), 7.24-7.22 (m, 1H), 5.52 (q,  $J$  = 6.6 Hz, 1H), 3.86 (s, 3H), 1.60 (d,  $J$  = 6.4 Hz, 3H).

**<sup>13</sup>C NMR** (CDCl<sub>3</sub>, 100 MHz) δ 170.6, 160.6, 143.7, 127.1, 122.9, 122.4, 107.4, 77.6, 55.7, 20.5.

**6-Chloro-3-methylisobenzofuran-1(3H)-one 2p:**

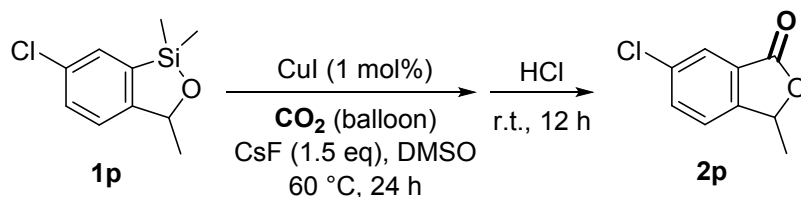

The synthesis of **2p** from **1b** (212 mg, 1 mmol) followed the synthesis of **2n**. Yield 152 mg (84%) yellow oil. This is a known compound and the spectroscopic data is in agreement with the literature.<sup>5f</sup>

**<sup>1</sup>H NMR** (CDCl<sub>3</sub>, 400 MHz) δ 7.85 (d, *J* = 1.8 Hz, 1H), 7.64 (dd, *J* = 1.8, 8.2 Hz, 1H), 7.39 (d, *J* = 8.2 Hz, 1H), 5.56 (q, *J* = 6.9 Hz, 1H), 1.64 (d, *J* = 6.9 Hz, 3H).

**<sup>13</sup>C NMR** (CDCl<sub>3</sub>, 100 MHz) δ 168.9, 149.3, 135.4, 134.3, 127.6, 125.6, 122.9, 77.6, 20.3.

**6-Iodo-3-methylisobenzofuran-1(3H)-one 2q:**

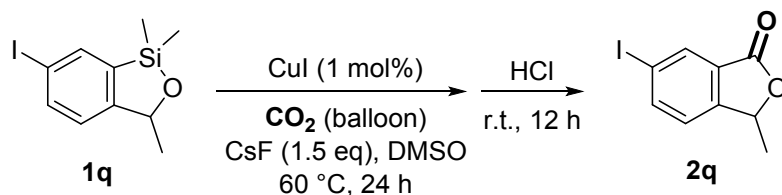

The synthesis of **2q** from **1q** (304 mg, 1 mmol) followed the synthesis of **2a**. Yield 195 mg (72%) white solid. M.p. 142-145 °C

**<sup>1</sup>H NMR** (CDCl<sub>3</sub>, 400 MHz) δ 8.22 (br. s., 1H), 7.98 (d, *J* = 7.8 Hz, 1H), 7.22 (d, *J* = 7.8 Hz, 1H), 5.52 (q, *J* = 6.9 Hz, 1H), 1.62 (d, *J* = 6.4 Hz, 3H).

**<sup>13</sup>C NMR** (CDCl<sub>3</sub>, 100 MHz) δ 168.6, 150.4, 142.7, 134.6, 128.0, 123.3, 93.9, 77.7, 20.2.

**DART-MS** *m/z* calcd for C<sub>9</sub>H<sub>8</sub>IO<sub>2</sub> [M+H]<sup>+</sup>: 274.95690, found: 274.95773

**IR** (KBr, cm<sup>-1</sup>) ν: 2362, 1756, 1196.

6-Bromo-3-methylisobenzofuran-1(3H)-one **2r**:

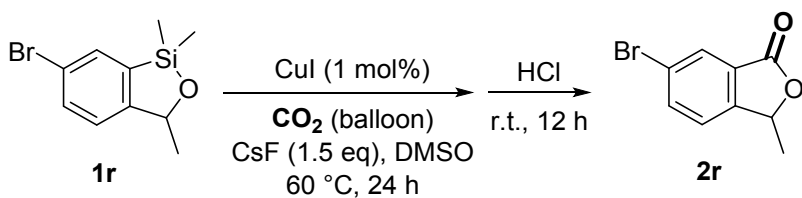

The synthesis of **2r** from **1r** (257 mg, 1 mmol) followed the synthesis of **2n**, but further purification by pTLC (EtOAc:*n*-Hexane = 4:6) was required for isolation of pure **2r**. Yield 170 mg (75%) white solid. This is a known compound and the spectroscopic data is in agreement with the literature.<sup>5g</sup>

**<sup>1</sup>H NMR** ( $\text{CDCl}_3$ , 400 MHz)  $\delta$  8.01 (s, 1H), 7.79 (d,  $J$  = 8.2 Hz, 1H), 7.34 (d,  $J$  = 8.2 Hz, 1H), 5.54 (q,  $J$  = 6.9 Hz, 1H), 1.63 (d,  $J$  = 6.9 Hz, 3H).

**<sup>13</sup>C NMR** ( $\text{CDCl}_3$ , 100 MHz)  $\delta$  168.8, 149.7, 137.1, 128.6, 127.8, 123.2, 123.0, 77.6, 20.2.

5-Bromo-3-methylisobenzofuran-1(3H)-one **2s**:

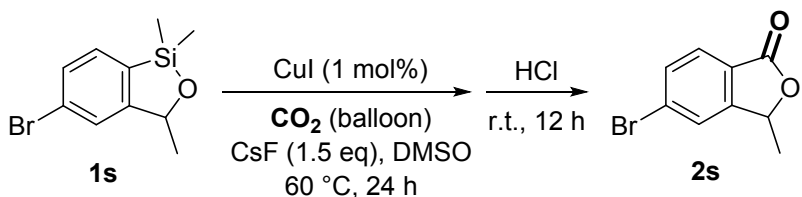

The synthesis of **2s** from **1s** (257 mg, 1 mmol) followed the synthesis of **2a**. Yield 160 mg (70%) white solid. M.p.  $109^\circ\text{C}$

**<sup>1</sup>H NMR** ( $\text{CDCl}_3$ , 400 MHz)  $\delta$  7.76-7.74 (m, 1H), 7.67-7.65 (m, 1H), 7.61 (s, 1H), 5.54 (q,  $J$  = 6.9 Hz, 1H), 1.64 (d,  $J$  = 6.9 Hz, 4H).

**<sup>13</sup>C NMR** ( $\text{CDCl}_3$ , 100 MHz)  $\delta$  169.4, 152.8, 132.7, 129.2, 127.0, 125.1, 124.7, 77.1, 20.2.

**DART-MS**  $m/z$  calcd for  $\text{C}_9\text{H}_8\text{BrO}_2$   $[\text{M}+\text{H}]^+$ : 226.97077, found: 226.97038

**IR** (KBr,  $\text{cm}^{-1}$ )  $\nu$ : 2361, 1750, 1335, 1051.

3-Isopropylisobenzofuran-1(3H)-one **2t**:



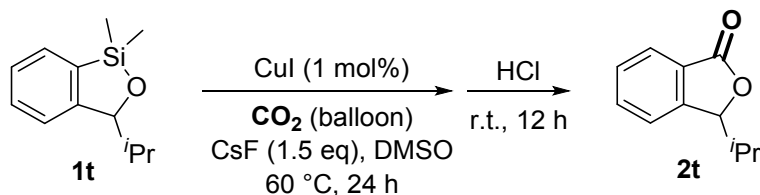

The synthesis of **2p** from **1p** (204 mg, 1 mmol) followed the synthesis of **2n**. Yield 130 mg (74%) yellow oil. This is a known compound and the spectroscopic data is in agreement with the literature.<sup>5f</sup>

**<sup>1</sup>H NMR** (CDCl<sub>3</sub>, 400 MHz)  $\delta$  7.90 (d,  $J$  = 7.3 Hz, 1H), 7.67 (t,  $J$  = 7.3 Hz, 1H), 7.53 (t,  $J$  = 7.3 Hz, 1H), 7.45 (d,  $J$  = 7.8 Hz, 1H), 5.38 (d,  $J$  = 3.7 Hz, 1H), 2.33-2.25 (m, 1H), 1.13 (d,  $J$  = 6.9 Hz, 3H), 0.81 (d,  $J$  = 6.9 Hz, 3H).

**<sup>13</sup>C NMR** (CDCl<sub>3</sub>, 100 MHz)  $\delta$  170.8, 148.8, 133.8, 129.0, 126.7, 125.6, 122.1, 85.6, 32.3, 18.7, 15.6.

#### 3-Phenylisobenzofuran-1(3H)-one **2u**:

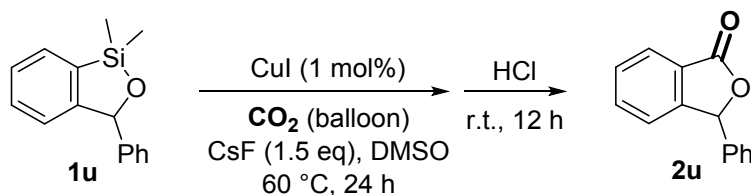

In an argon glove box, a flame-dried 20 or 30 mL two neck tube was charged with CuI (2 mg, 0.01 mmol), **1u** (240 mg, 1 mmol) and DMSO (4 mL). CsF (228 mg, 1.5 mmol) was added and the tube was taken out and attached to a CO<sub>2</sub> balloon using a three-way stopcock. The tube was then immersed in a pre-heated oil bath at 60 °C and stirred vigorously for 24 h. After being cooled down, the reaction mixture was diluted with H<sub>2</sub>O (20 mL), NaOH 1N (4 mL), stirred for 1 h and washed with Et<sub>2</sub>O (3 x 10 mL). The aqueous phase was acidified using HCl 1N (12 mL), stirred for another 12 h and extracted to EtOAc (3 x 15 mL). The combined organic phase was washed with H<sub>2</sub>O (2 x 15 mL), dried over Na<sub>2</sub>SO<sub>4</sub> and the solvent was removed under reduced pressure. Pure **2u** was obtained after pTLC using EtOAc:n-Hexane 1:1. Yield: 147 mg (70%) white solid. This is a known compound and the spectroscopic data is in agreement with the literature.<sup>5f</sup>

**<sup>1</sup>H NMR** (CDCl<sub>3</sub>, 500 MHz) δ 7.95 (d, *J* = 7.9 Hz, 1H), 7.63 (t, *J* = 8.0 Hz, 1H), 7.54 (t, *J* = 7.5 Hz, 1H), 7.37-7.32 (m, 3H), 7.33 (d, *J* = 7.9 Hz, 1H), 7.28-7.26 (m, 2H), 6.40 (s, 1H).

**<sup>13</sup>C NMR** (CDCl<sub>3</sub>, 125 MHz) δ 170.5, 149.6, 136.3, 134.3, 129.3, 129.2, 128.9, 126.9, 125.6, 125.5, 122.8, 82.7.

3-Butylisobenzofuran-1(3H)-one **2v**:

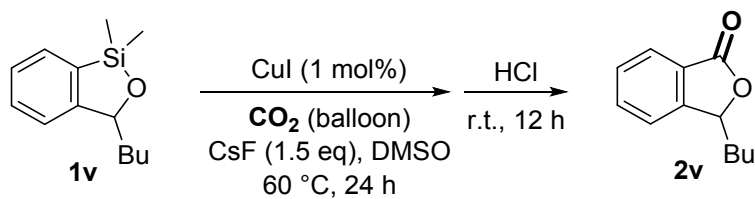

The synthesis of **2v** from **1v** (220 mg, 1 mmol)<sup>3</sup> followed the synthesis of **2n**. Yield 162 mg (85%) yellow oil. This is a known compound and the spectroscopic data is in agreement with the literature.<sup>5f</sup>

**<sup>1</sup>H NMR** (CDCl<sub>3</sub>, 500 MHz) δ 7.91 (d, *J* = 7.4 Hz, 1H), 7.68 (t, *J* = 7.4 Hz, 1H), 7.53 (t, *J* = 7.4 Hz, 1H), 7.44 (d, *J* = 7.4 Hz, 1H), 5.48 (dd, *J* = 7.7, 4.3 Hz, 1H), 2.09-2.02 (m, 1H), 1.81-1.74 (m, 1H), 1.53-1.34 (m, 4H), 0.92 (t, *J* = 7.1 Hz, 3H).

**<sup>13</sup>C NMR** (CDCl<sub>3</sub>, 125 MHz) δ 170.7, 150.1, 133.9, 129.0, 126.1, 125.7, 121.7, 81.4, 34.4, 26.9, 22.4, 13.8.

3,3-Dimethylisobenzofuran-1(3H)-one **2w**:

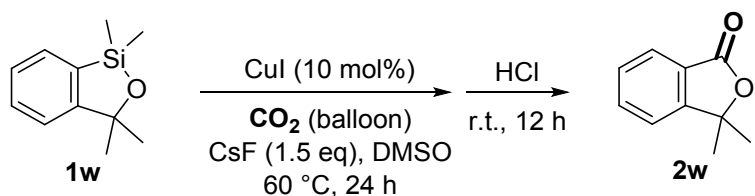

The synthesis of **2w** from **1w** (192 mg, 1 mmol) followed the synthesis of **2n**, with slight modification. CuI (20 mg, 0.1 mmol) was used and **1w** was dissolved in small amount of DMSO before being added to the reaction mixture. Yield 95 mg (59%) white solid. This is a known compound and the spectroscopic data is in agreement with the literature.<sup>5i</sup>

**$^1\text{H}$  NMR** ( $\text{CDCl}_3$ , 400MHz)  $\delta$  7.86 (dd,  $J$  = 0.9, 7.8 Hz, 1H), 7.68-7.64 (m, 1H), 7.52-7.48 (m, 1H), 7.42-7.39 (m, 1H), 1.66 (s, 6H).

**$^{13}\text{C}$  NMR** ( $\text{CDCl}_3$ , 101MHz)  $\delta$  169.8, 154.9, 134.1, 128.9, 125.7, 125.2, 120.6, 85.4, 27.3.

#### Part IV: Gram-Scale Synthesis of **2p**

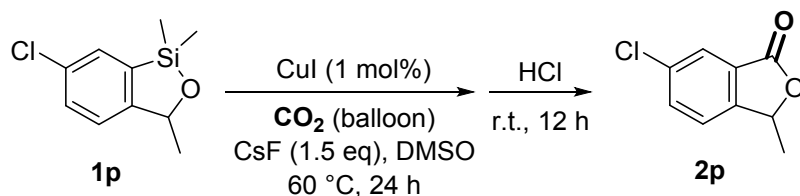

In an argon glove box, a flame-dried 100 mL two neck flask was charged with CuI (9 mg, 0.048 mmol) and CsF (1.09 g, 7.2 mmol). The flask was taken out and attached to a vacuum line and a  $\text{CO}_2$  balloon using a three-way stopcock. After three evacuation- $\text{CO}_2$  refill cycles was conducted, DMSO (20 mL) and **1p** (1.02 g, 4.8 mmol) were added successively. The tube was then immersed in a pre-heated oil bath at 60  $^\circ\text{C}$  and stirred vigorously for 24 h. After being cooled down, the reaction mixture was diluted with  $\text{H}_2\text{O}$  (50 mL), NaOH 1N (20 mL), stirred for 1 h and washed with  $\text{Et}_2\text{O}$  (3 x 30 mL). The aqueous phase was acidified using HCl 1N (60 mL), stirred for another 12 h and extracted to EtOAc (3 x 25 mL). The combined organic phase was washed with  $\text{H}_2\text{O}$  (3 x 50 mL), dried over  $\text{Na}_2\text{SO}_4$  and the solvent was removed under reduced pressure to afford crude **2p** (almost pure). The crude was further purified using column chromatography (EtOAc:*n*-Hexane = 3:7). Yield: 670 mg (77%) yellow oil.

#### Part V: Synthesis of Natural Products **4**, **5** and **6**

##### 4,5,6-Trimethoxy-3-methylisobenzofuran-1(3H)-one **2w**:

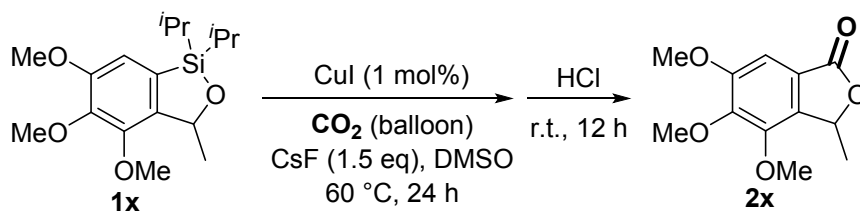

The synthesis of **2w** from **1w** (324 mg, 1 mmol) followed the synthesis of **2a**, with slight modification. **1w** was dissolved in a small amount of DMSO before being added to the reaction mixture. Yield 139 mg (58%) yellow oil.

**<sup>1</sup>H NMR** (CDCl<sub>3</sub>, 500 MHz) δ 7.10 (s, 1H), 5.49 (q, *J* = 6.2 Hz, 1H), 3.97 (s, 3H), 3.92 (s, 3H), 3.90 (s, 3H), 1.62 (d, *J* = 6.8 Hz, 3H).

**<sup>13</sup>C NMR** (CDCl<sub>3</sub>, 125 MHz) δ 170.2, 155.5, 147.5, 146.8, 136.6, 121.0, 102.5, 76.3, 61.0, 60.8, 56.3, 19.6.

**DART-MS** *m/z* calcd for C<sub>12</sub>H<sub>15</sub>O<sub>5</sub> [M+H]<sup>+</sup>: 239.09195, found: 239.09226

**IR** (KBr, cm<sup>-1</sup>) ν: 2941, 1761, 1614, 1478, 1421, 1341, 1253, 1196, 1116, 1074, 1041.

4,5,6-Trihydroxy-3-methylisobenzofuran-1(3H)-one **4**:

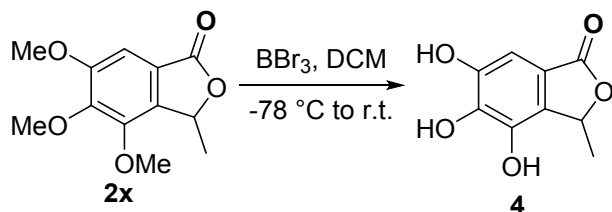

In a 20 mL 2-neck tube, attached with an argon balloon, was charged **2x** (120 mg, 0.5 mmol) and DCM (2 mL). The solution was cooled to -78 °C in a dry ice-acetone bath. Then, BBr<sub>3</sub> (1 M solution in DCM, 2.3 mL) was added dropwise. The reaction mixture was stirred at -78 °C for 30 minutes and at room temperature for 3 h. After that, it was again cooled to -78 °C and carefully quenched with saturated NaHCO<sub>3</sub> (1 mL), diluted with brine and extracted to EtOAc (3 x 15 mL). The combined organic solution was washed once with brine, dried over Na<sub>2</sub>SO<sub>4</sub> and the solvent was removed under reduced pressure to afford compound **6** as brown solid. Yield: 97 mg (quant.). This is a known compound and the spectroscopic data is in agreement with the literature.<sup>6</sup>

**<sup>1</sup>H NMR** (DMSO-*d*<sub>6</sub>, 400 MHz) δ 9.89 (s, 1H), 9.38 (br. s., 1H), 9.31 (s, 1H), 6.69 (s, 1H), 5.46 (q, *J* = 6.4 Hz, 1H), 1.48 (d, *J* = 6.4 Hz, 3H).

**<sup>13</sup>C NMR** (DMSO-*d*<sub>6</sub>, 100 MHz) δ 170.2, 147.4, 139.9, 139.6, 130.6, 115.1, 101.5, 75.5, 19.4.

6-Hydroxy-4-methoxy-5-methylisobenzofuran-1(3H)-one **2x**:

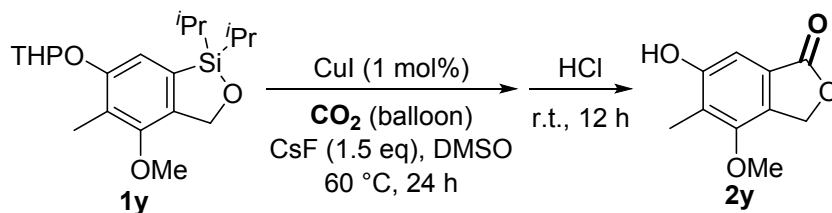

The synthesis of **2x** from **1x** (364 mg, 1 mmol) followed the synthesis of **2u**. Yield: 125 mg (65%) white solid. This is a known compound and the spectroscopic data is in agreement with the literature.<sup>7</sup>

**$^1\text{H}$  NMR** ( $\text{CD}_3\text{OD}$ , 600 MHz)  $\delta$  6.93 (s, 1H), 5.47 (s, 2H), 3.91 (s, 3H), 2.16 (s, 3H).

**$^{13}\text{C}$  NMR** ( $\text{CD}_3\text{OD}$ , 150 MHz)  $\delta$  173.7, 159.3, 154.8, 127.8, 125.8, 124.9, 105.3, 70.2, 59.6, 9.8.

4-Methoxy-5-methyl-6-((3-methylbut-2-en-1-yl)oxy)isobenzofuran-1(3H)-one **4**:

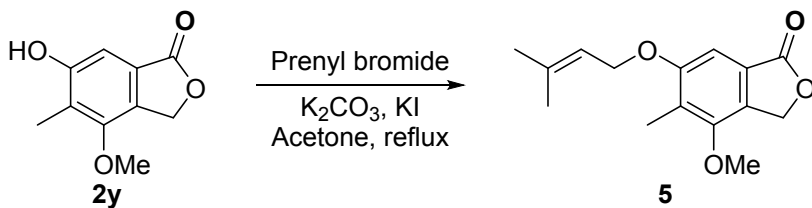

To a 10 mL 2-neck tube was added **2y** (97 mg, 0.5 mmol),  $\text{K}_2\text{CO}_3$  (345 mg, 2.5 mmol) and  $\text{KI}$  (250 mg, 1.5 mmol). The tube was attached to an argon balloon. Acetone (1.5 mL) and prenyl bromide (223 mg, 1.5 mmol) was added *via* syringes. The reaction was refluxed for 24 h. Then, it was diluted to  $\text{H}_2\text{O}$  (10 mL) and extracted to  $\text{EtOAc}$  (3 x 15 mL). The combined organic solution was washed with brine, dried over  $\text{Na}_2\text{SO}_4$  and the solvent was removed under reduced pressure. Compound **5** was obtained as white solid after column chromatography. Yield: 130 mg (quant.). This is a known compound and the spectroscopic data is in agreement with the literature.<sup>7</sup>

**$^1\text{H}$  NMR** ( $\text{CDCl}_3$ , 600 MHz)  $\delta$  7.08 (s, 1H), 5.49 (br. s., 1H), 5.38 (s, 2H), 4.58 (d,  $J = 5.5$  Hz, 2H), 3.89 (s, 3H), 2.21 (s, 3H), 1.80 (s, 3H), 1.75 (s, 3H).

$^{13}\text{C}$  NMR ( $\text{CDCl}_3$ , 150 MHz)  $\delta$  171.3, 159.2, 152.9, 138.2, 128.0, 125.7, 124.7, 119.2, 101.9, 68.2, 65.8, 59.3, 25.7, 18.3, 9.7.

(E)-6-((3,7-Dimethylocta-2,6-dien-1-yl)oxy)-4-methoxy-5-methylisobenzofuran-1(3H)-one  
**5** (Marilone C):

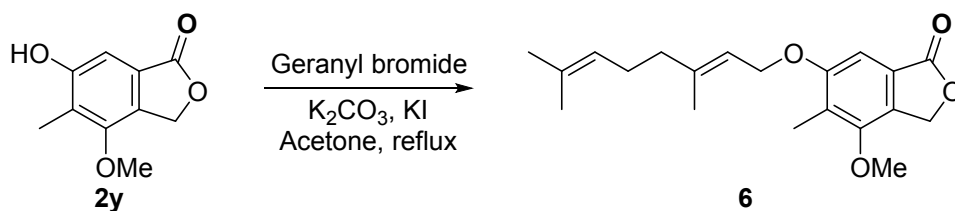

Following the above procedure, using geranyl bromide (325 mg, 1.5 mmol) instead of prenyl bromide, compound **5** was obtained as colorless oil after column chromatography. Yield: 130 mg (78%). This is a known compound and the spectroscopic data is in agreement with the literature.<sup>8</sup>

$^1\text{H}$  NMR (Acetone- $d_6$ , 600 MHz)  $\delta$  7.04 (s, 1H), 5.53-5.50 (m, 3H), 5.11 (t,  $J$  = 6.5 Hz, 1H), 4.71 (d,  $J$  = 6.2 Hz, 2H), 3.97 (s, 3H), 2.14-2.09 (m, 7H), 1.79 (s, 3H), 1.64 (s, 3H), 1.60 (s, 3H).

$^{13}\text{C}$  NMR (Acetone- $d_6$ , 150 MHz)  $\delta$  171.2, 159.9, 154.0, 141.7, 132.2, 128.6, 126.0, 125.0, 124.8, 120.7, 102.2, 69.0, 66.6, 59.4, 40.2, 27.1, 25.9, 17.8, 16.8, 9.9.

## Part VI: References

1. (a) Y. Hua, S. Jung, J. Roh and J. Jeon, *J. Org. Chem.*, 2015, **80**, 4661; (b) Y. Hua, P. Asgari, U. S. Dakarapu and J. Jeon, *Chem. Commun.*, 2015, **51**, 3778.
2. E. M. Simmons and J. F. Hartwig, *J. Am. Chem. Soc.*, 2010, **132**, 17092.
3. D. Martinez-Solorio, A. T. Hoye, M. H. Nguyen and A. B. Smith, *Org. Lett.*, 2013, **15**, 2454.
4. S. F. Nielsen, S. B. Christensen, G. Cruciani, A. Kharazmi and T. Liljefors, *J. Med. Chem.*, 1998, **41**, 4819.
5. (a) N. Vila, P. Besada, D. Viña, M. Sturlese, S. Moro and C. Terán, *RSC Adv.*, 2016, **6**, 46170; (b) Y.-H. Zhang, B.-F. Shi and J.-Q. Yu, *Angew. Chem. Int. Ed.*, 2009, **48**, 6097; (c)

- P. Stanetty, I. Rodler and B. Krumpak, *J. Prakt. Chem.*, 1993, **335**, 17; (d) B. Egan, M. Paradowski, L. H. Thomas and R. Marquez, *Org. Lett.*, 2011, **13**, 2086; (e) H. K. Neudeck, *Monatsh Chem*, 1996, **127**, 201. (f) D. H. T. Phan, B. Kim and V. M. Dong, *J. Am. Chem. Soc.*, 2009, **131**, 15608; (g) J. Yang and N. Yoshikai, *J. Am. Chem. Soc.*, 2014, **136**, 16748; (h) J. Mangas-Sánchez, E. Busto, V. Gotor-Fernández and V. Gotor, *Org. Lett.*, 2012, **14**, 1444; (i) L. Mahendar and G. Satyanarayana, *J. Org. Chem.*, 2015, **80**, 7089.
6. E. L. Mullady, W. P. Millett, H.-D. Yoo, A. S. Weiskopf, J. Chen, D. DiTullio, V. Knight-Connoni, D. E. Hughes and W. E. Pierceall, *J. Nat. Prod.*, 2004, **67**, 2086.
7. X.-L. Yang, S. Zhang, Q.-B. Hu, D.-Q. Luo and Y. Zhang, *J Antibiot*, 2011, **64**, 723.
8. C. Almeida, S. Kehraus, M. Prudêncio and G. M. König, *Beilstein J. Org. Chem.*, 2011, **7**, 1636.

## Part VII: NMR Spectra of Starting Materials and Products

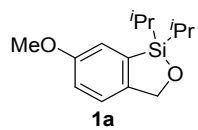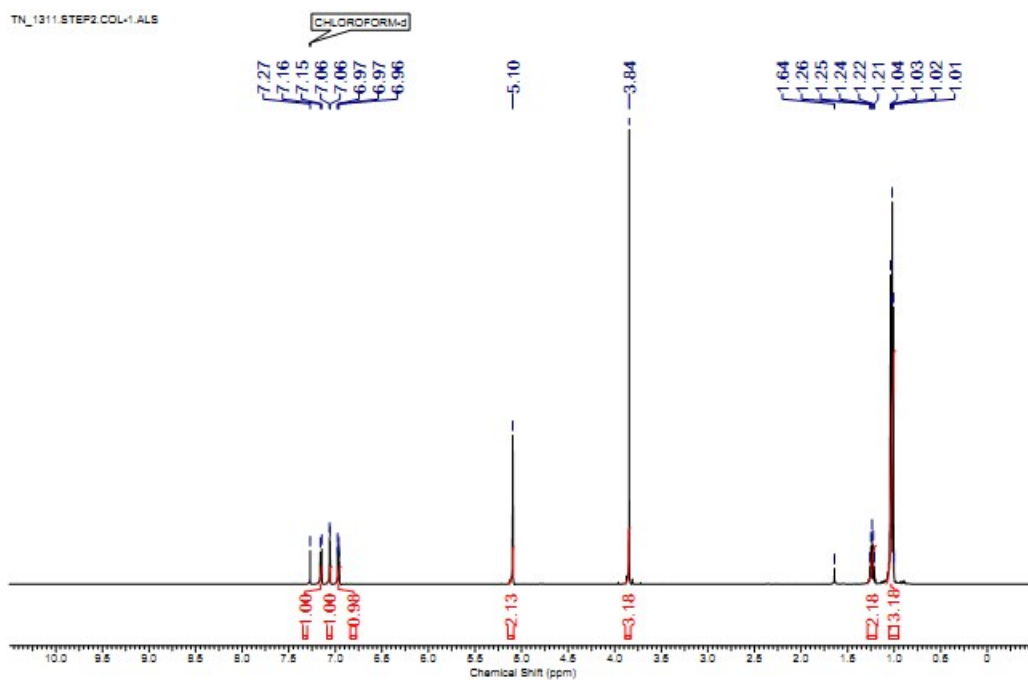



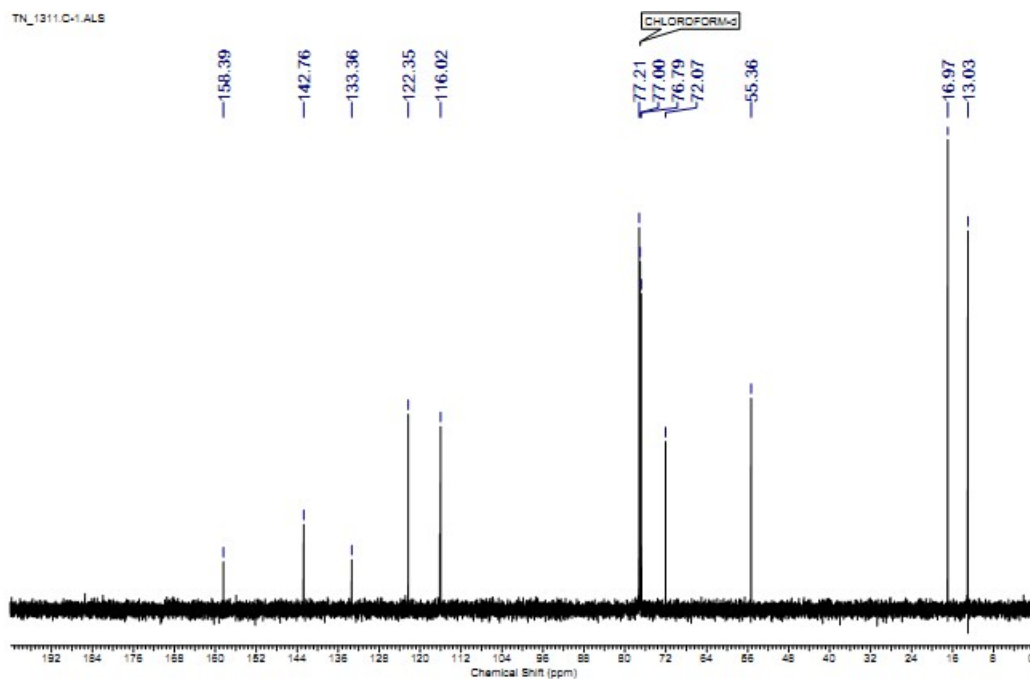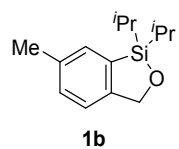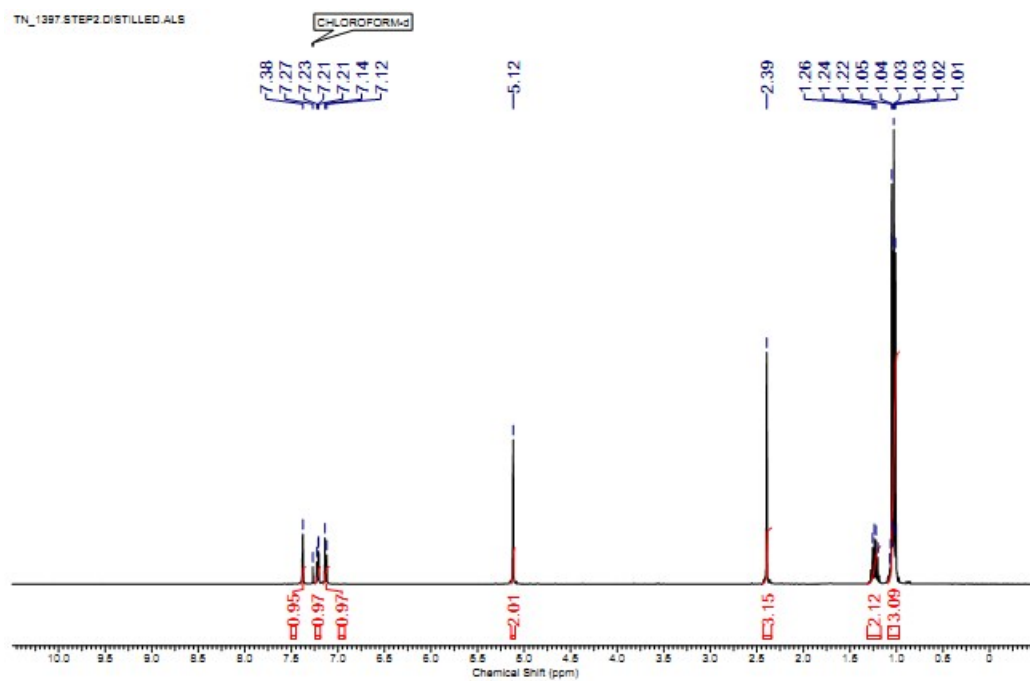

TN\_1397.C ALS

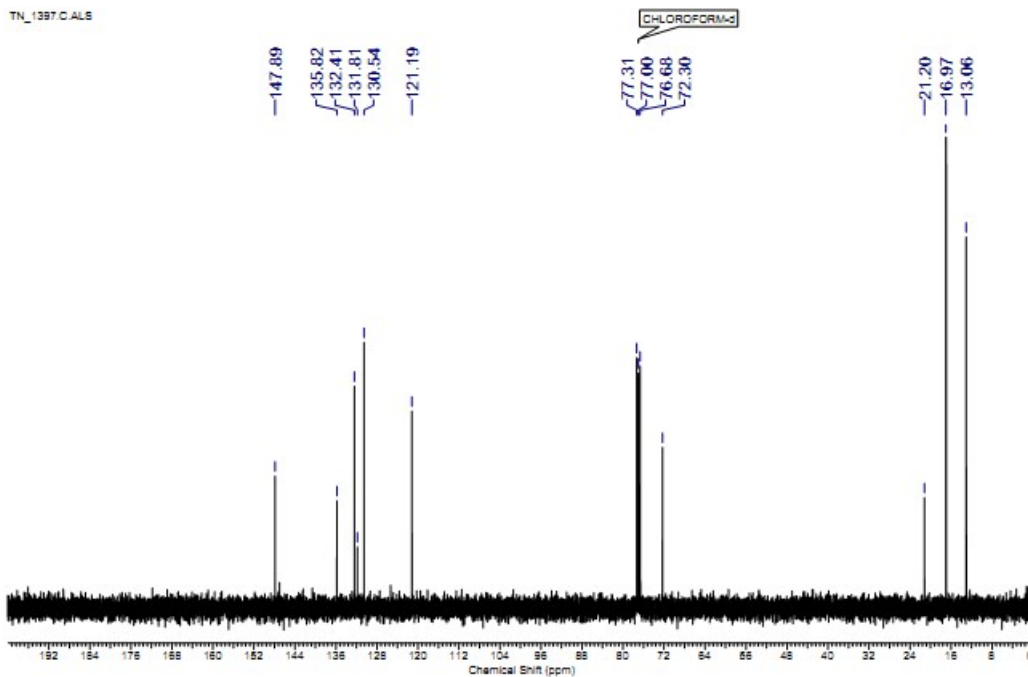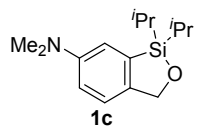

TN\_1343 STEP3.COL-1 ALS

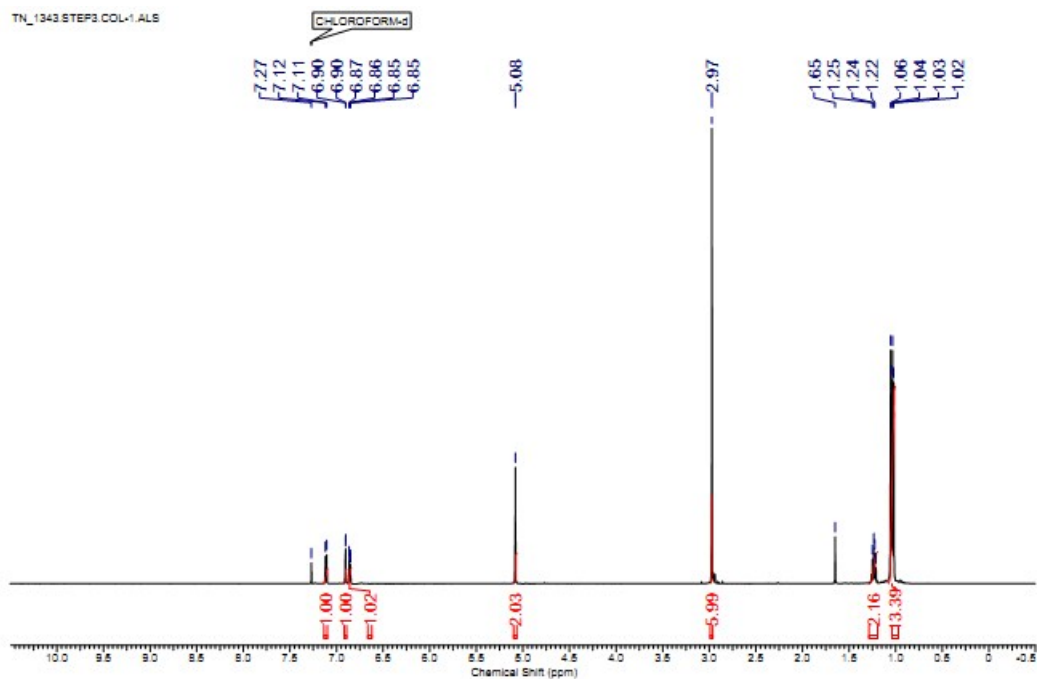

TN\_1343.C-1.ALS

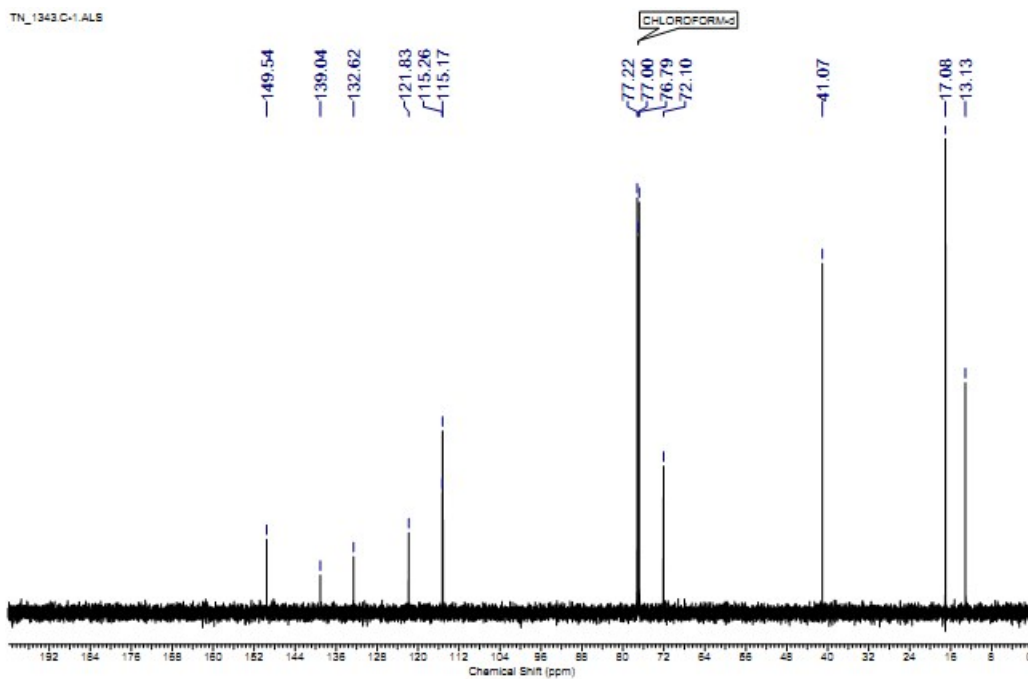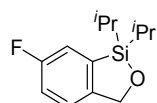

1d

TN\_1403 STEPS DISTILLED ALS

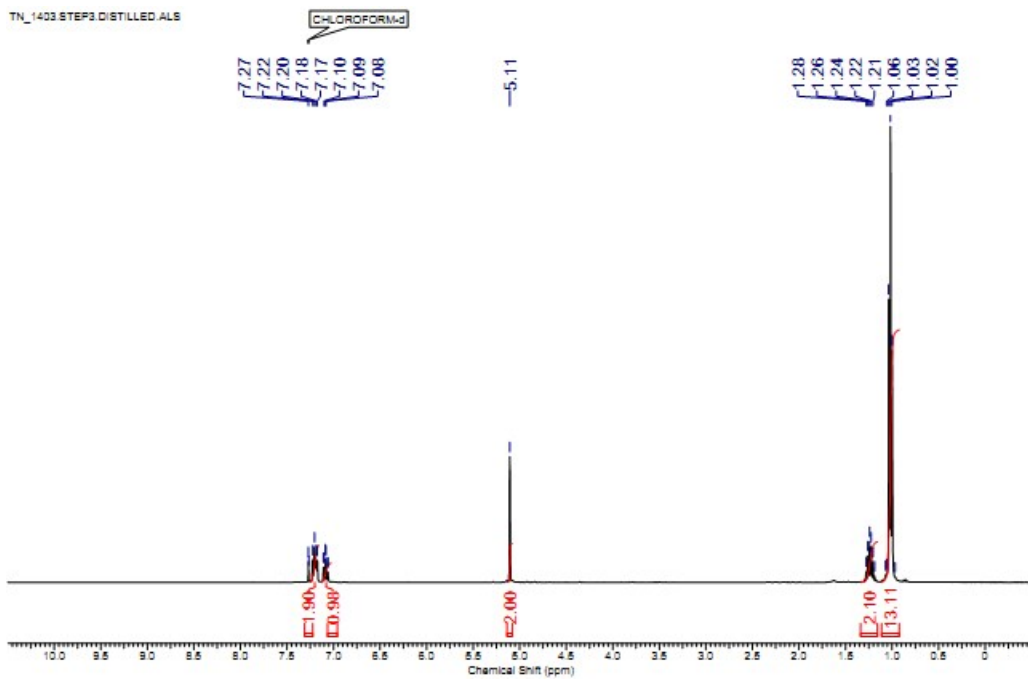

TN\_1403.C ALB

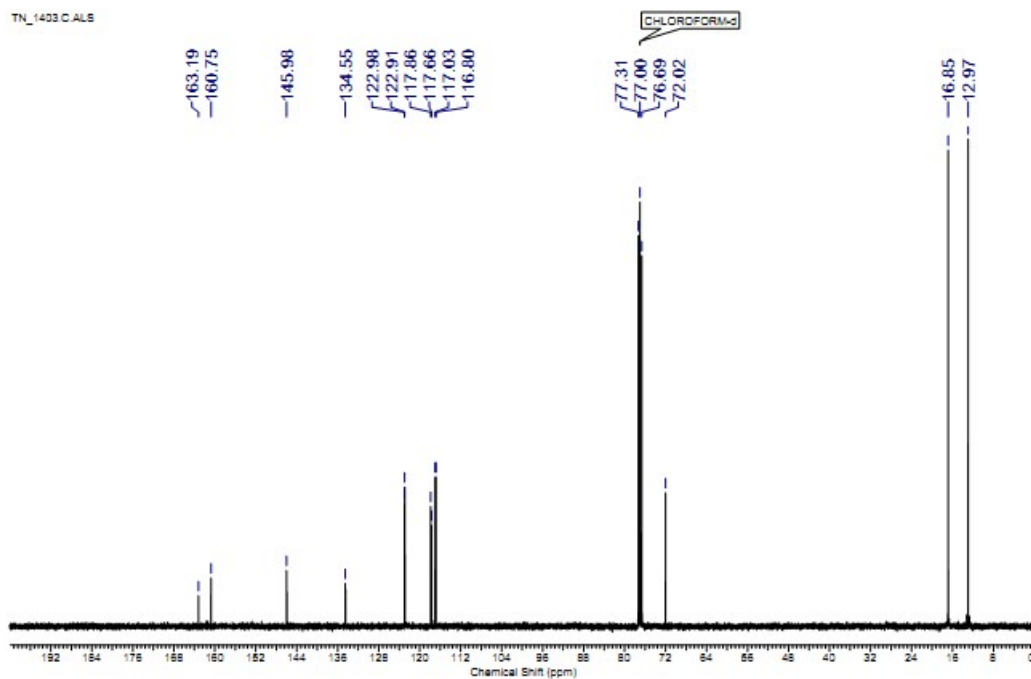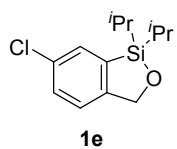

TN\_1395 STEP2.COL ALB

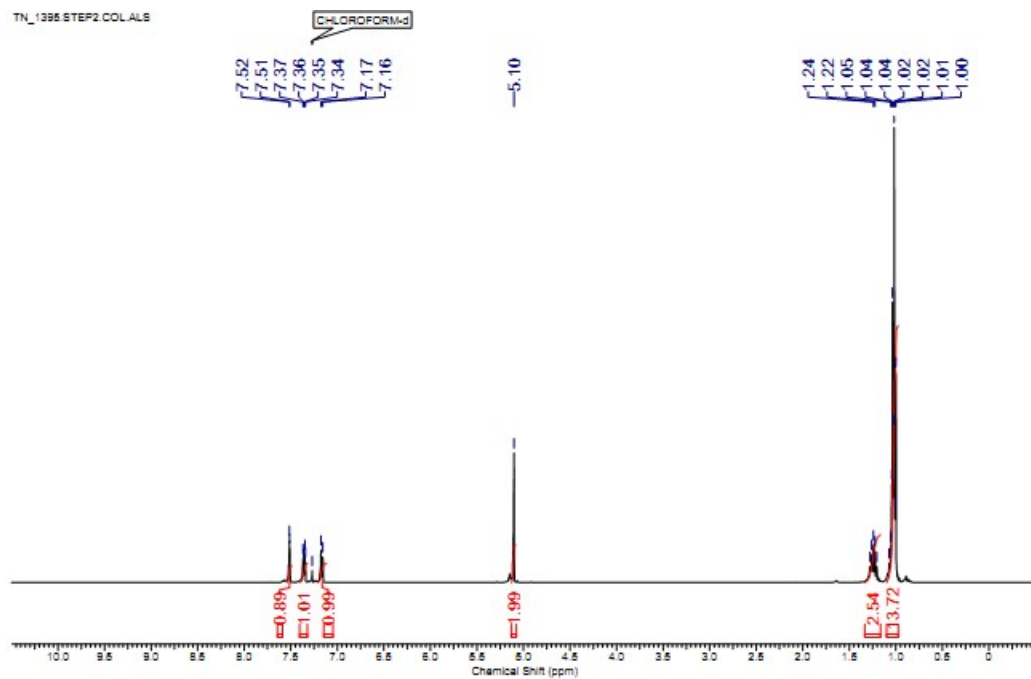

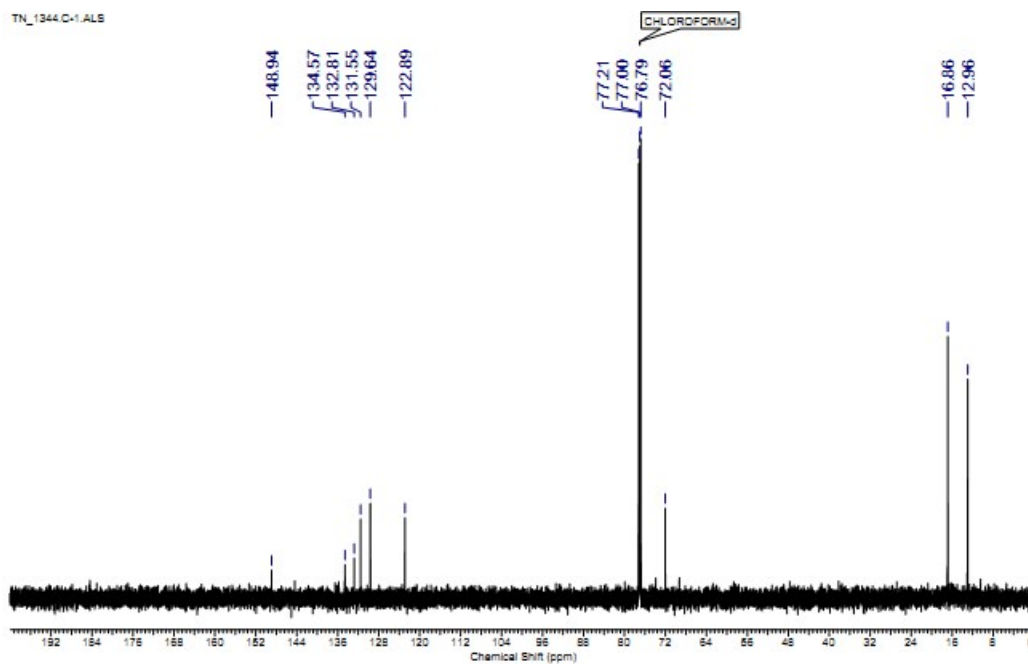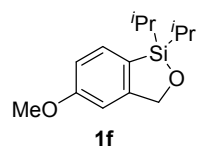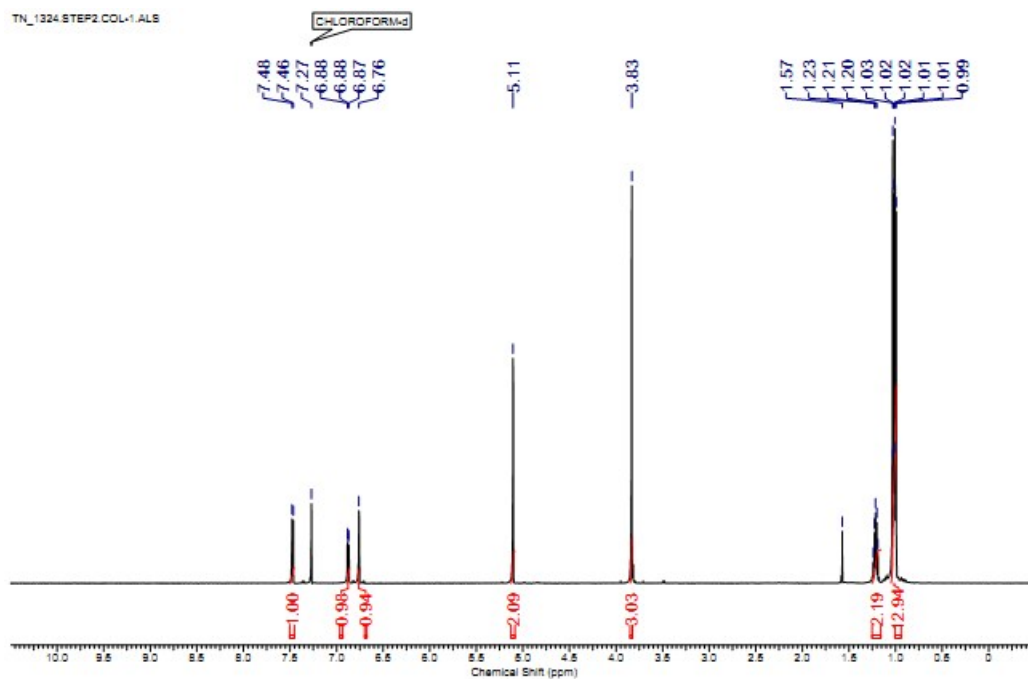

TN\_1324 C-1 ALS

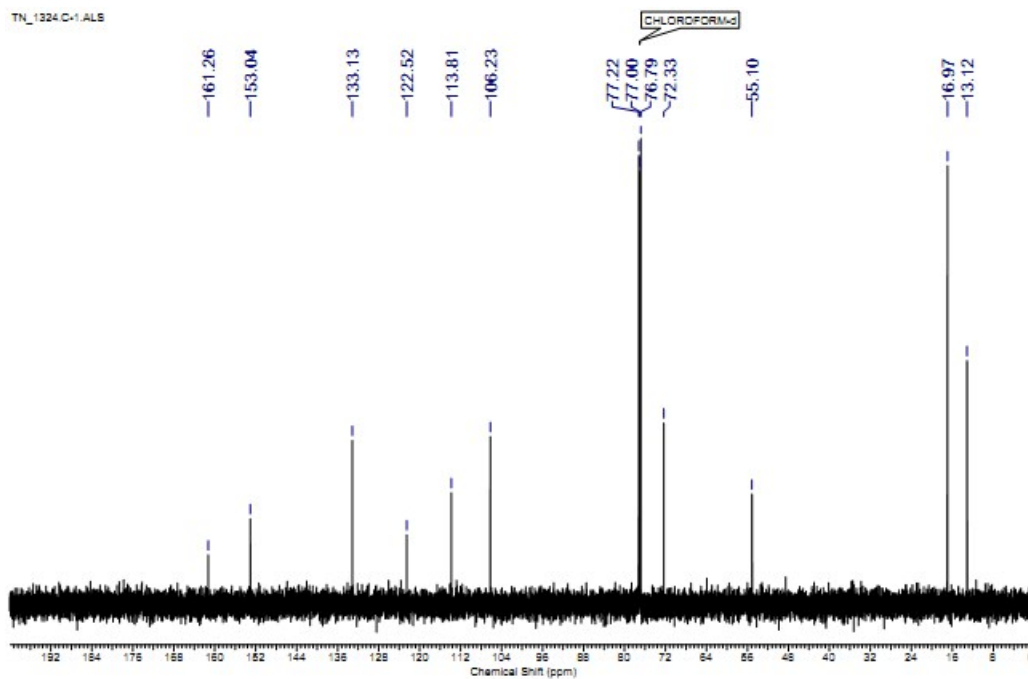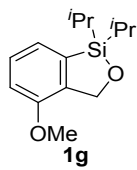

TN\_1328 RECOL-2 ALS

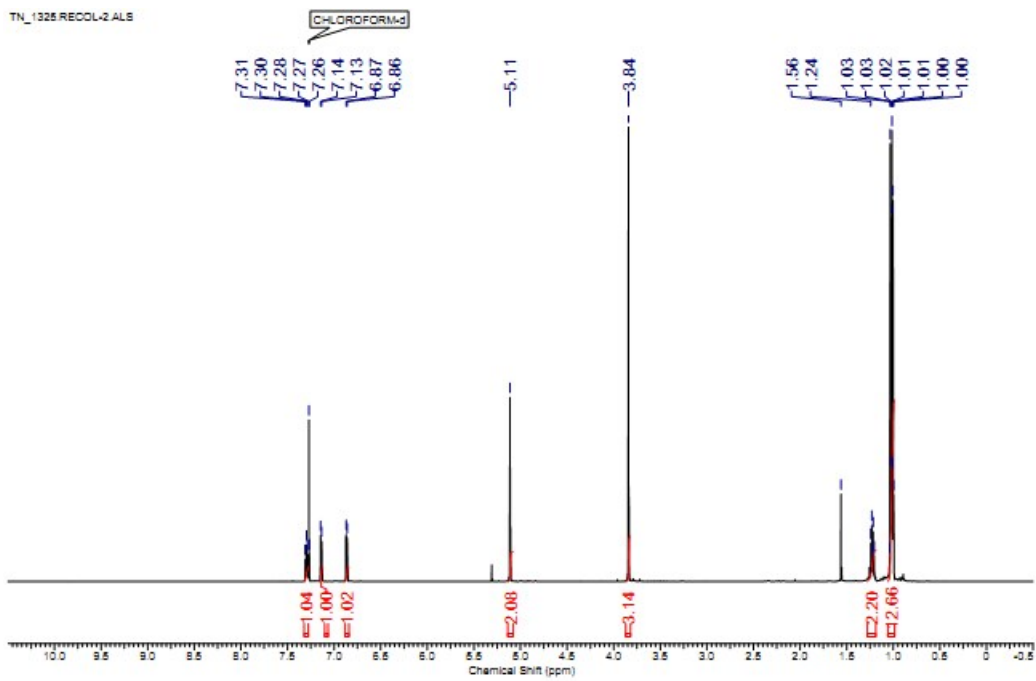

TN\_1326\_C\_COPY-2.ALS

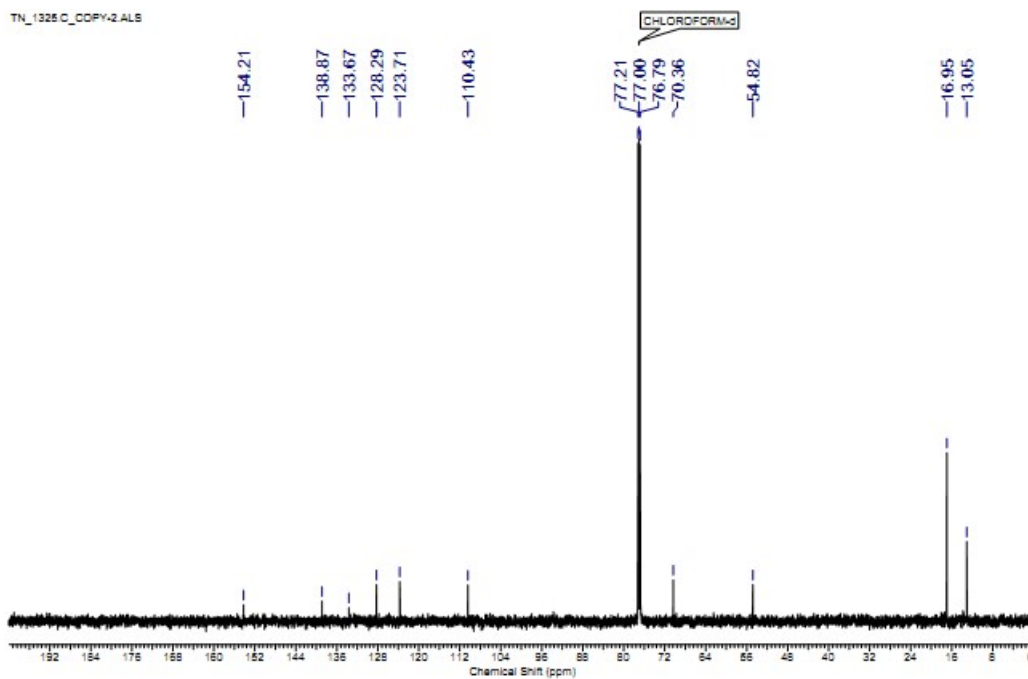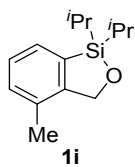

TN\_1394 STEP2 DISTILLED.ALS

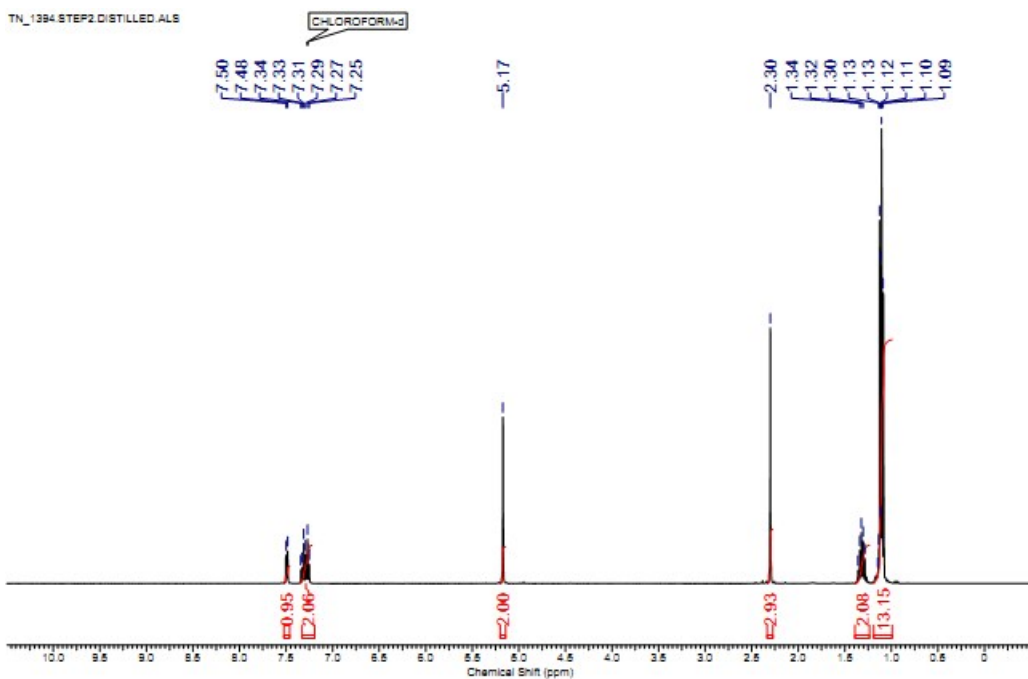

TN\_1328.C-1.ALS

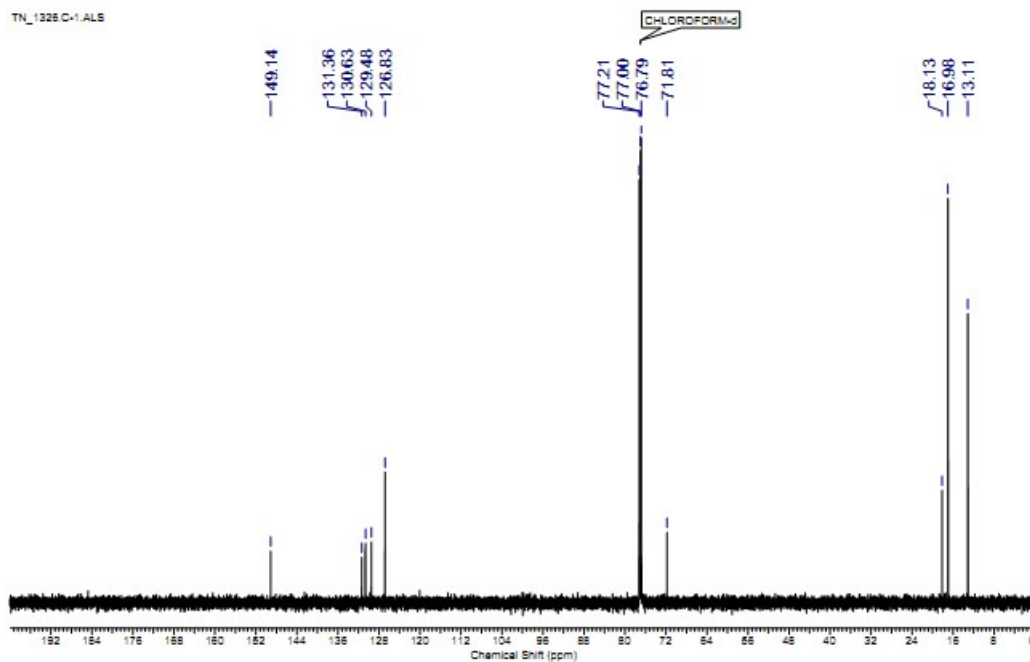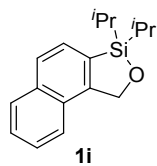

TN\_1348 STEP2.COL-1.ALS

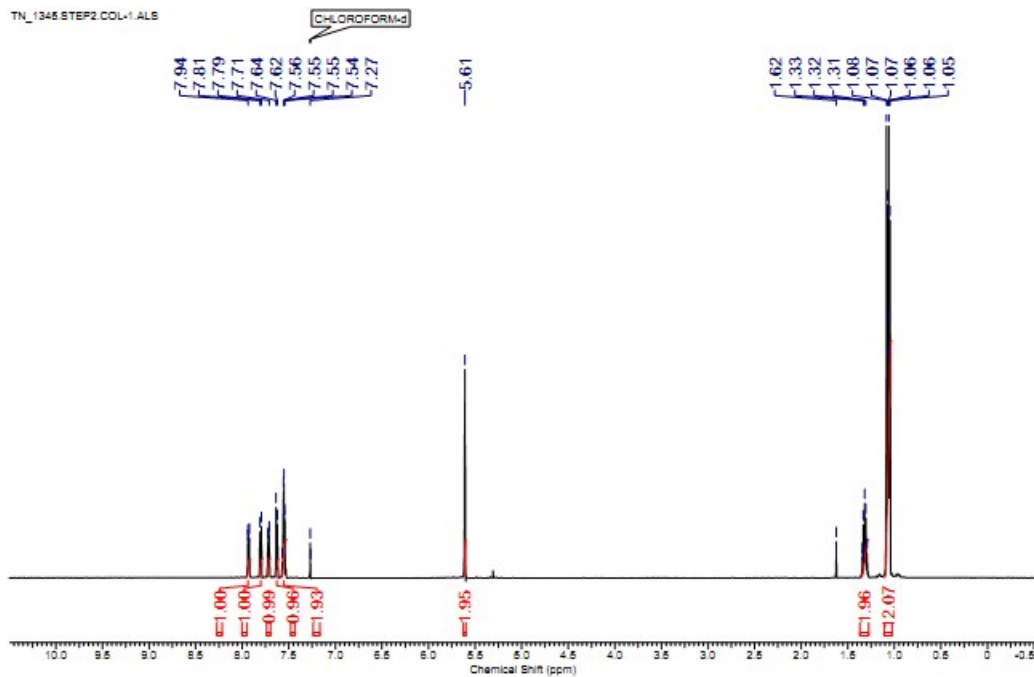



TN\_1348 C\_COPY-2.4LS

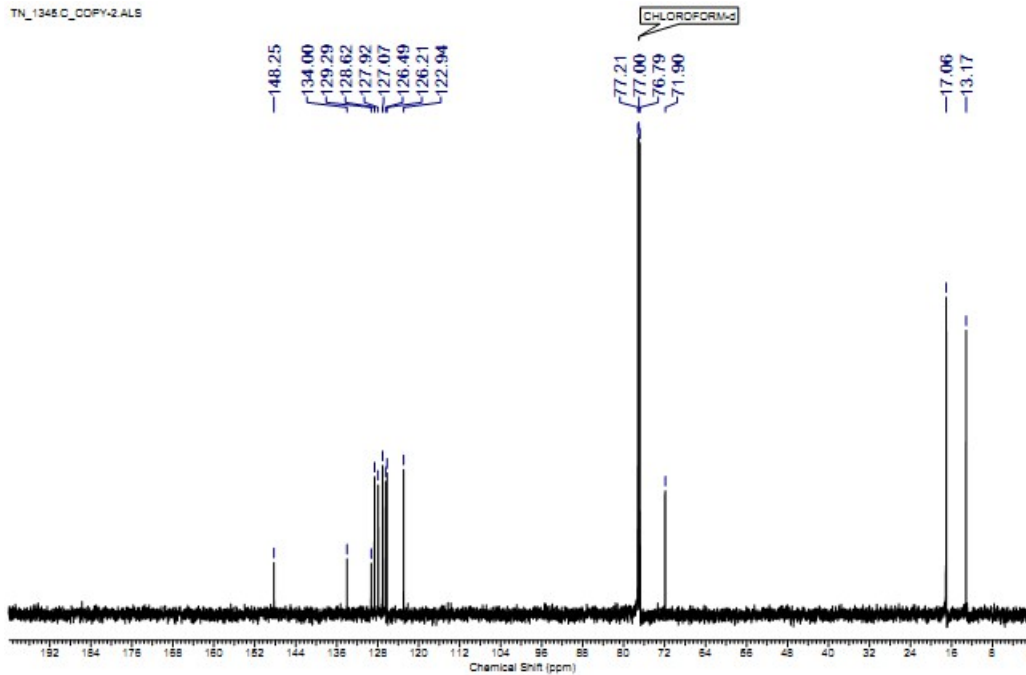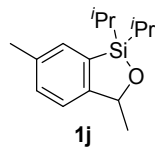

TN\_1398 STEP2 COL.4LS

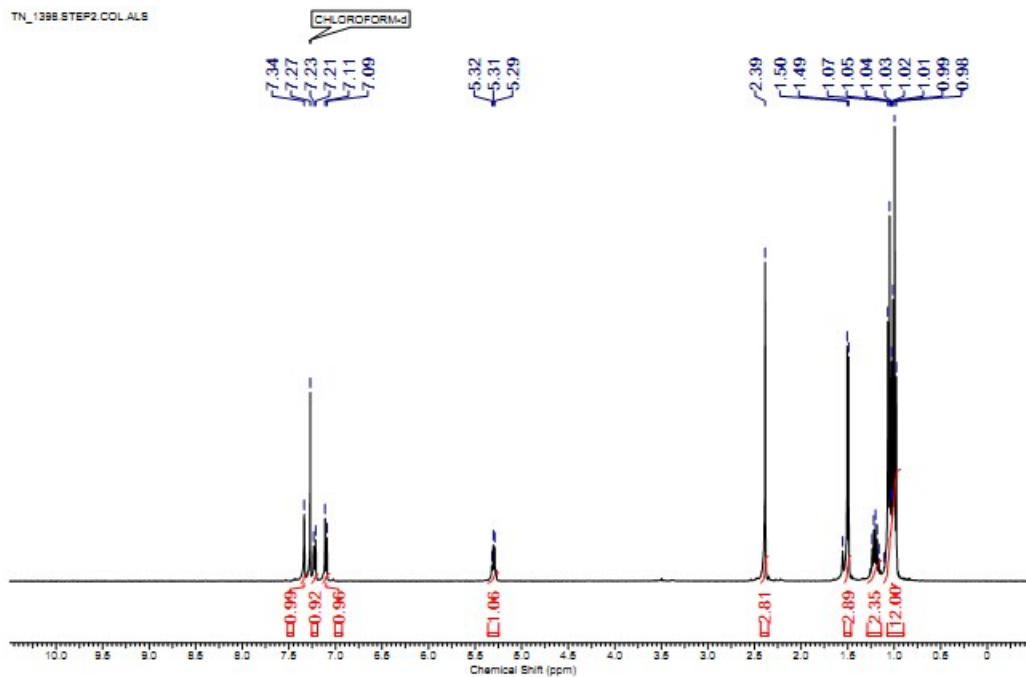

TN\_1398.C ALS

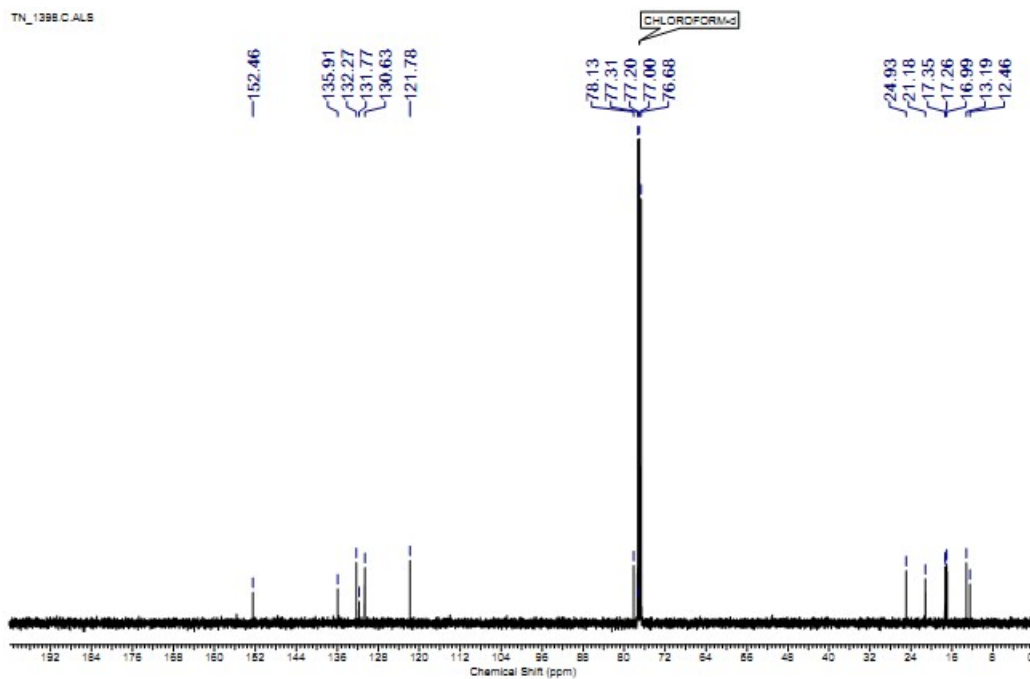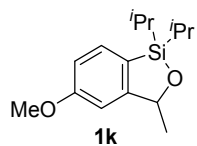

TN\_1400 STEP3 COLALS

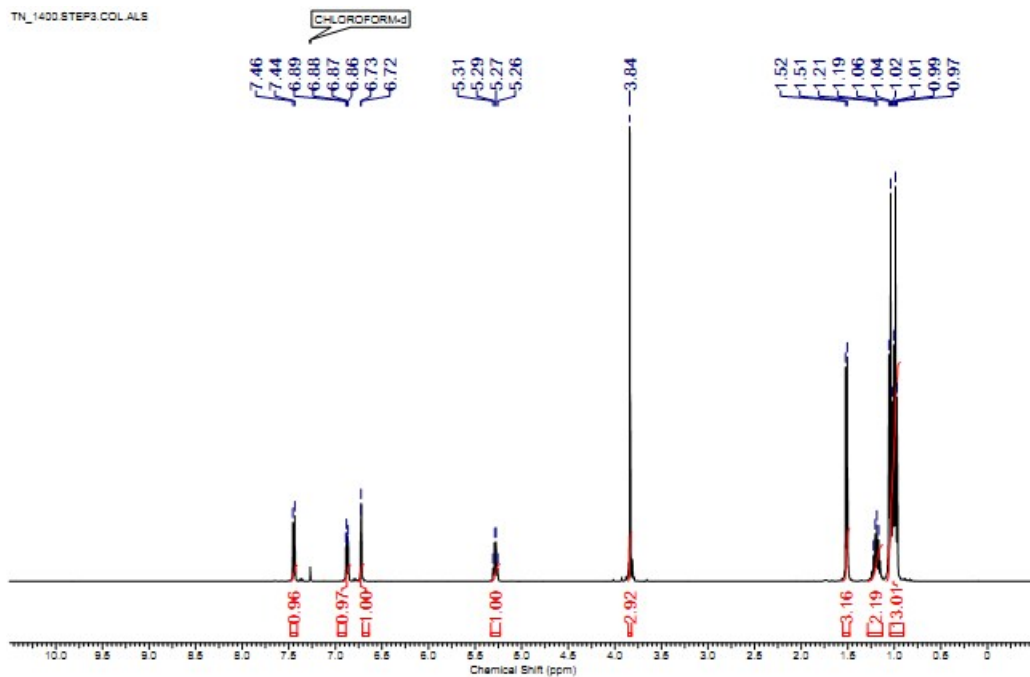

TN\_1400.C ALS

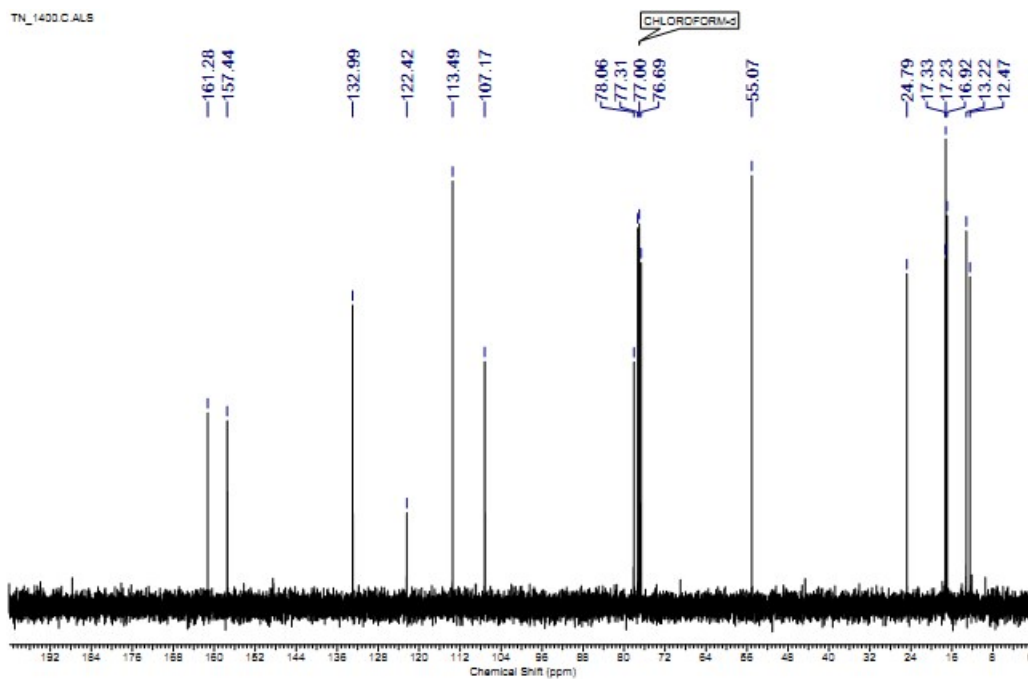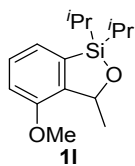

TN\_1401 STEP3 COLALS

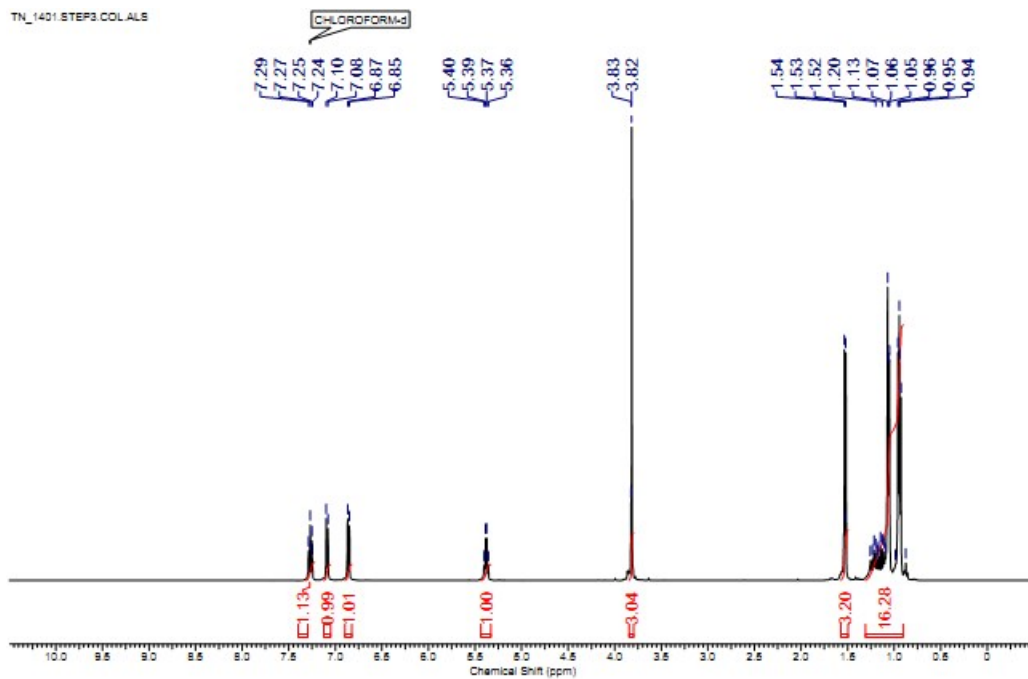

TN\_1401.C.FINAL\_COPY.ALS

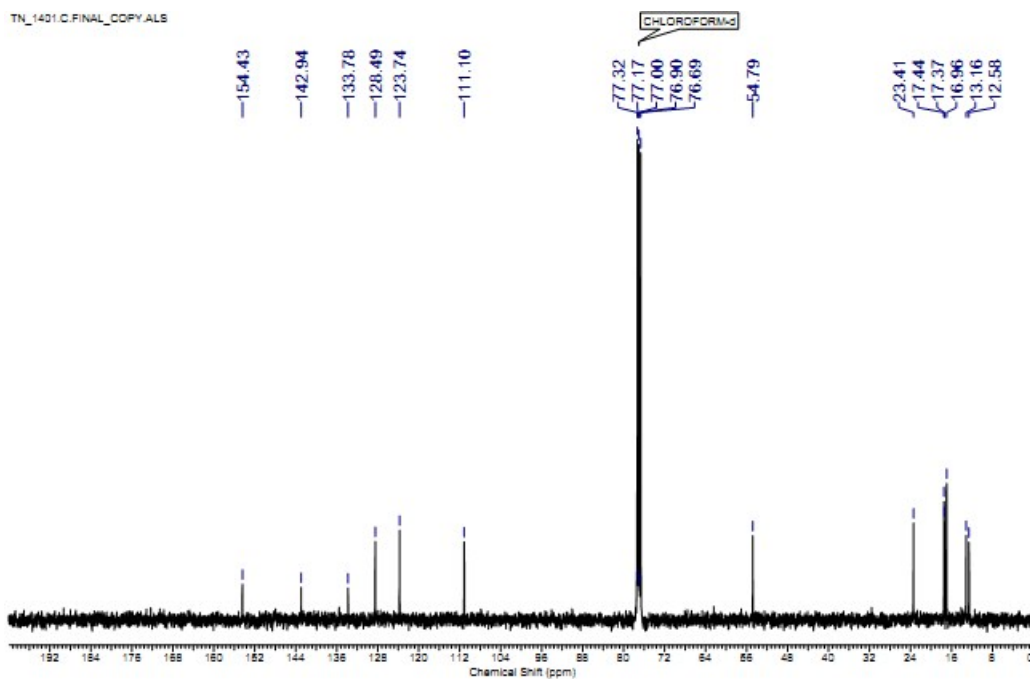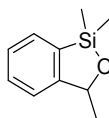

1n

1217.STEP2.ISOLATED.KUGELROHR2.ALS

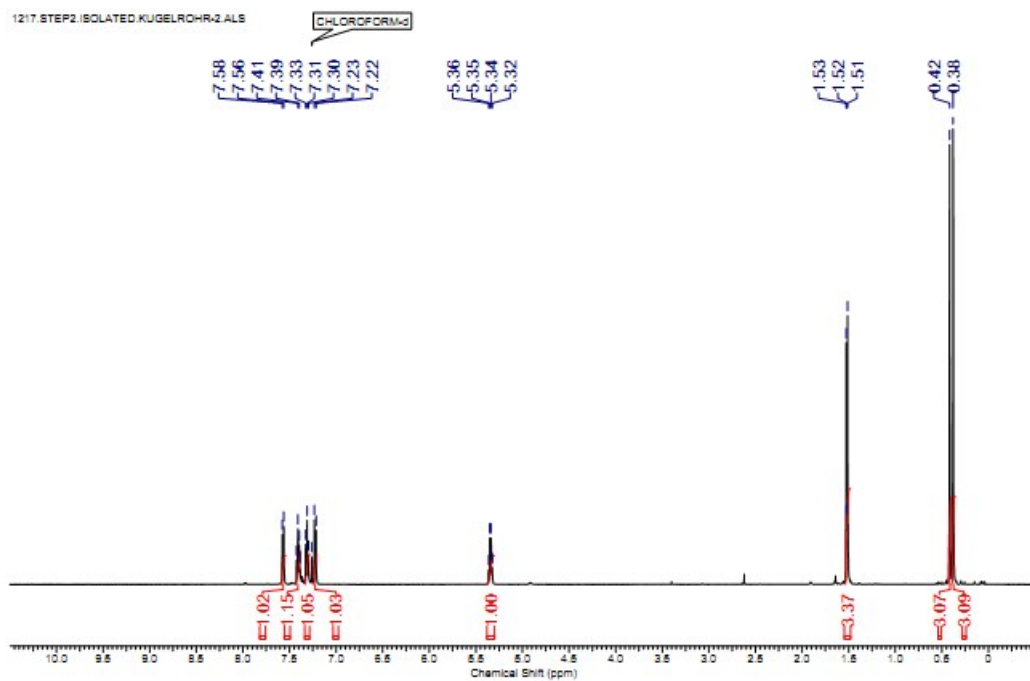

1217.C-2.ESP

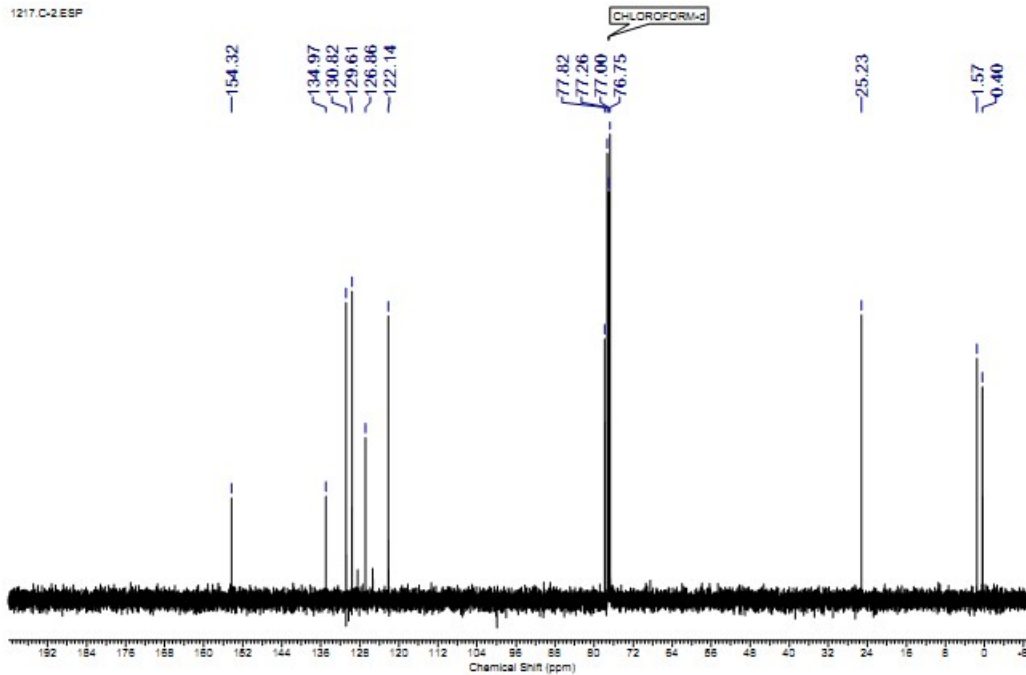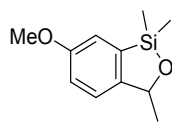

10

TN\_1248.STEP3.DISTILLED.BULB1.ALS

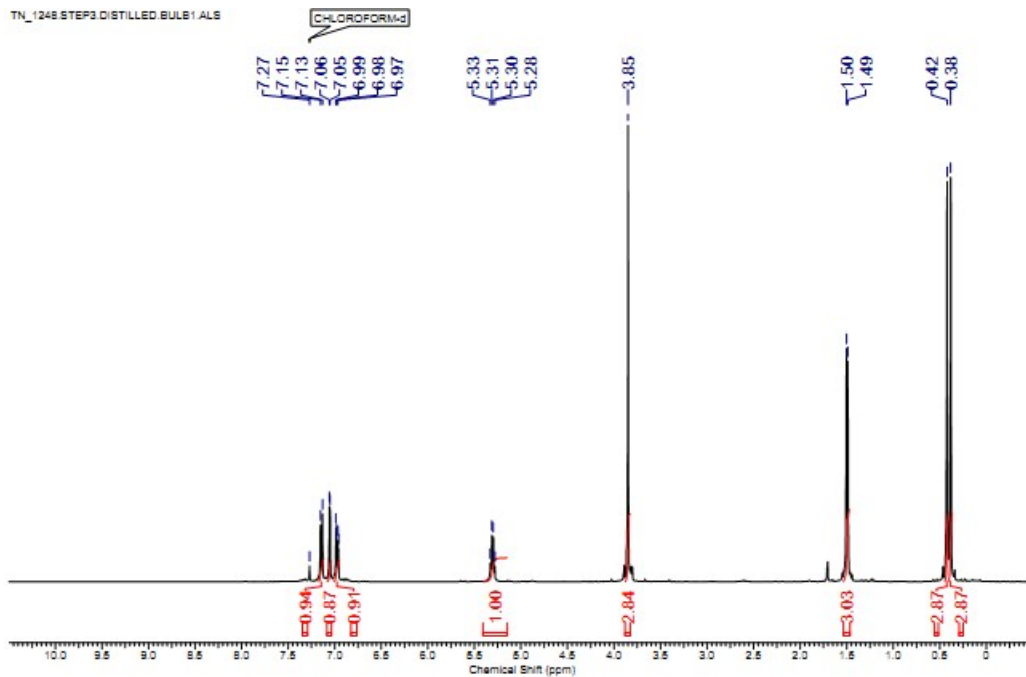

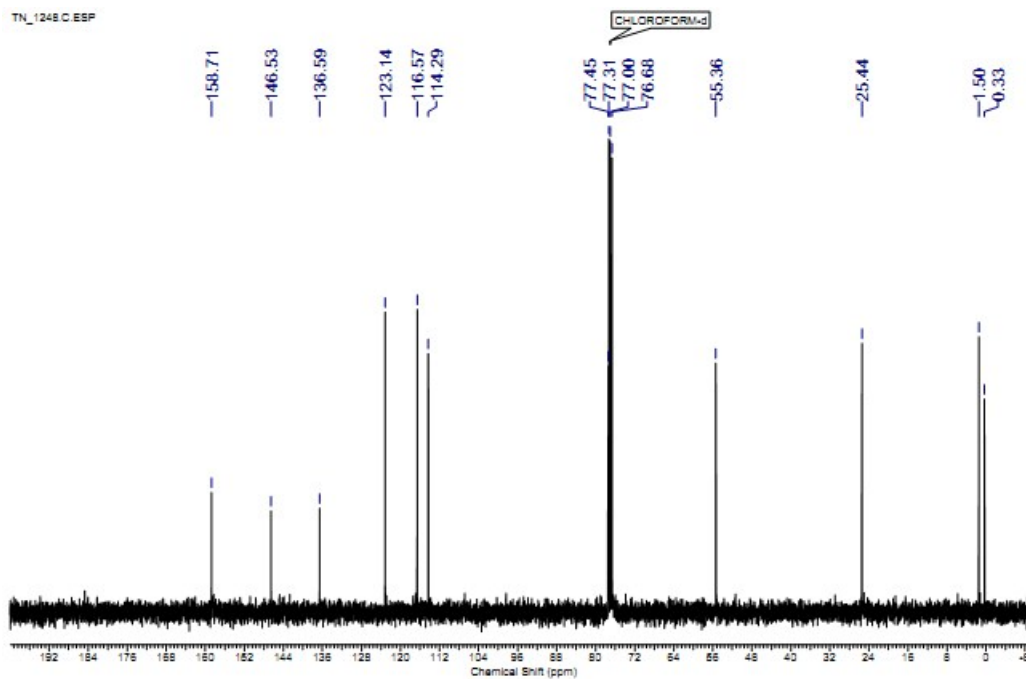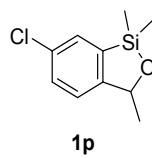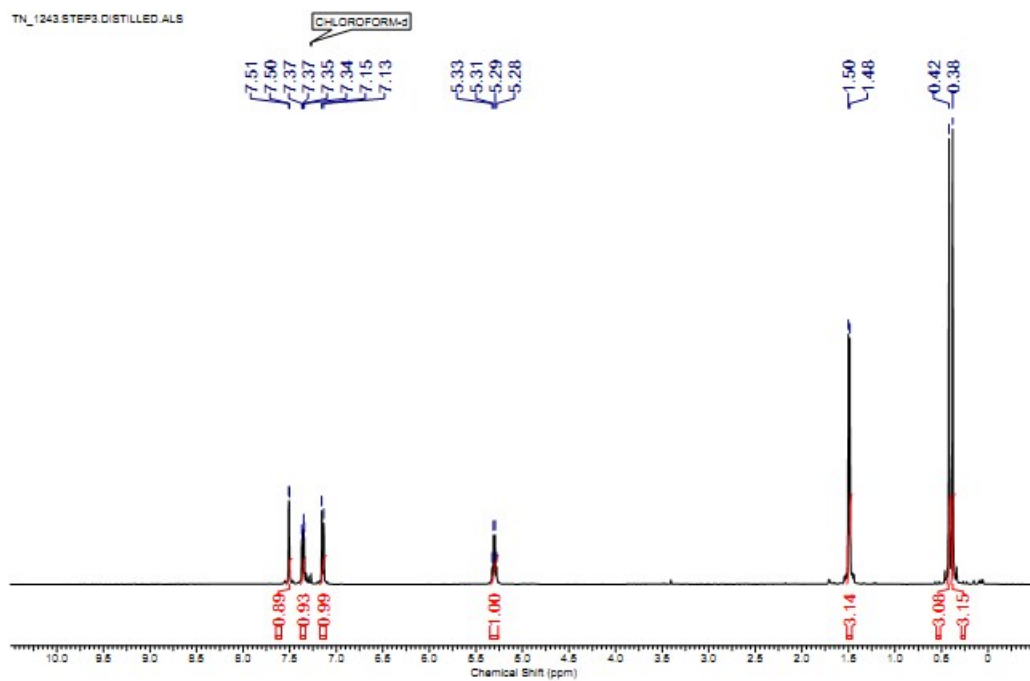

TN\_1243.C.ALS

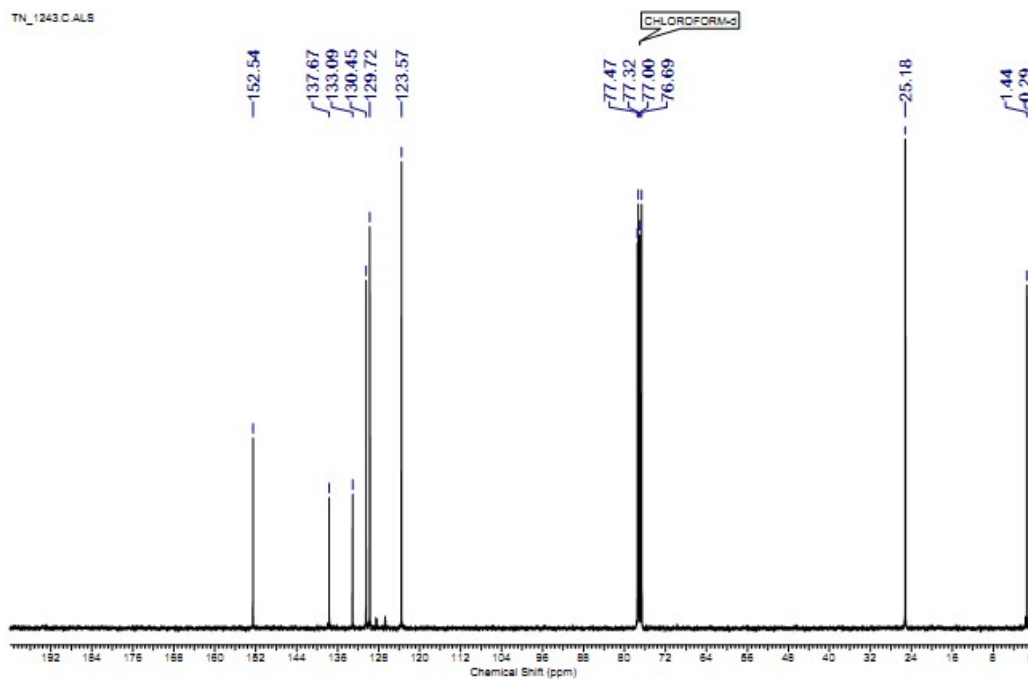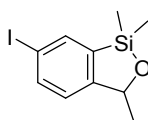

1q

TN\_1244 STEP3.DISTILLED.ESP

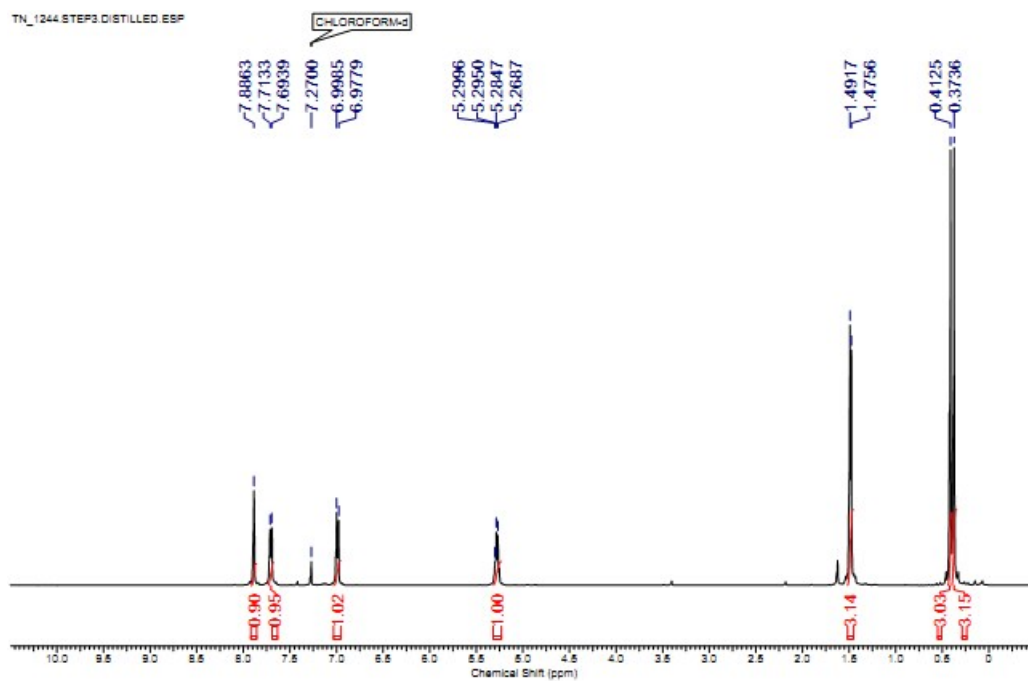

TN\_1244 C ALS

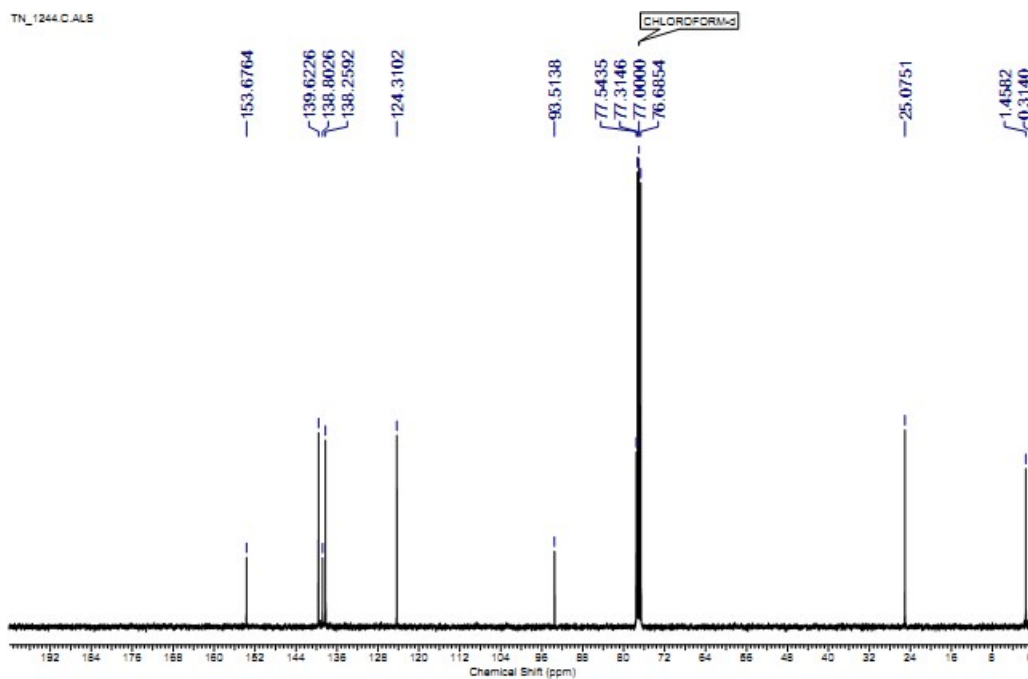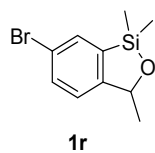

1227 STEP3 DISTILLED ALS

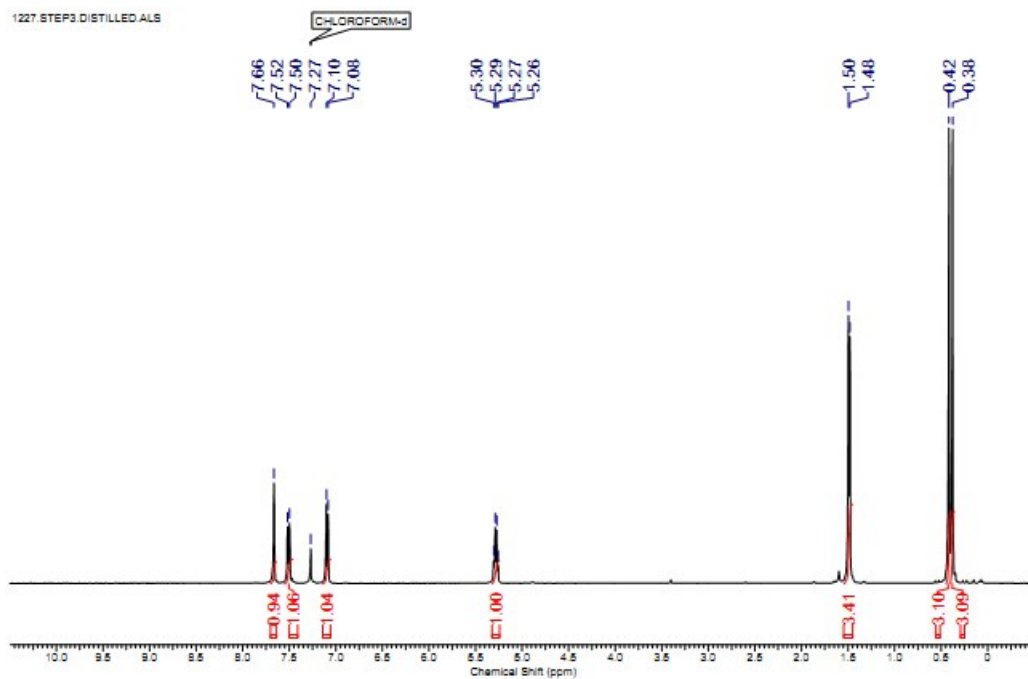



1227 STEP3.C.E5P

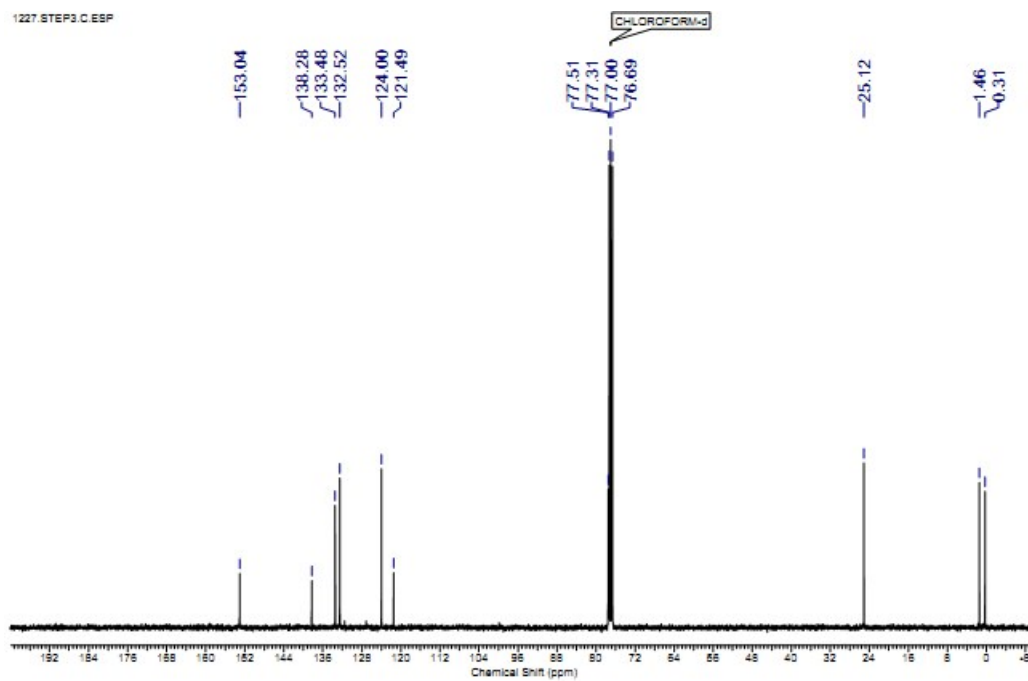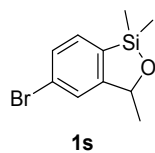

TN\_1251 STEP3.DISTILLED.ALS

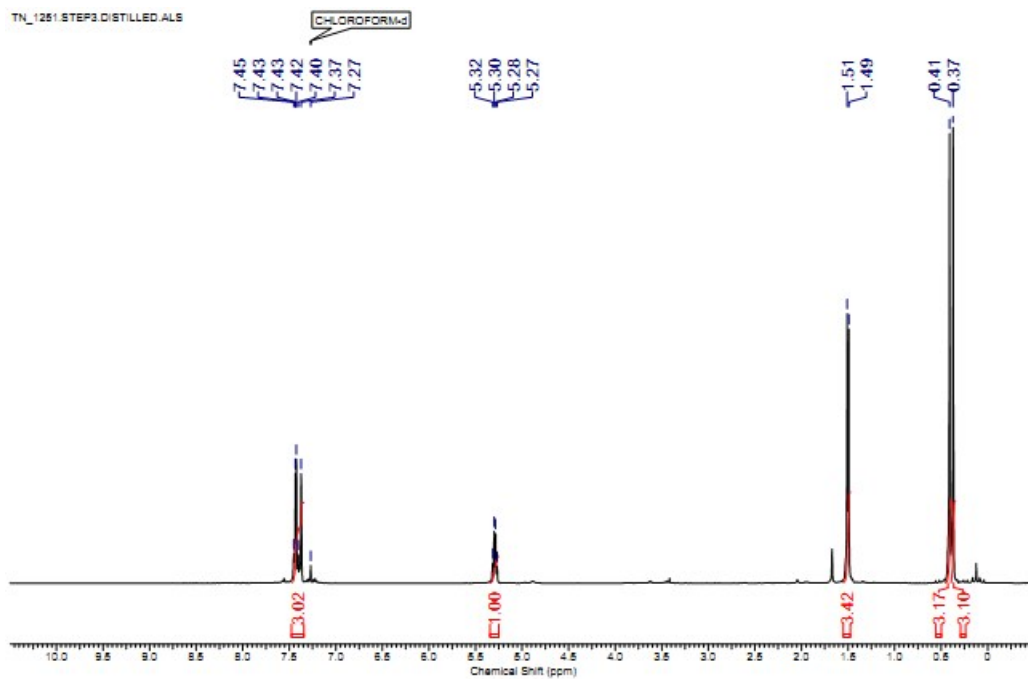

TN\_1251.C.ALS

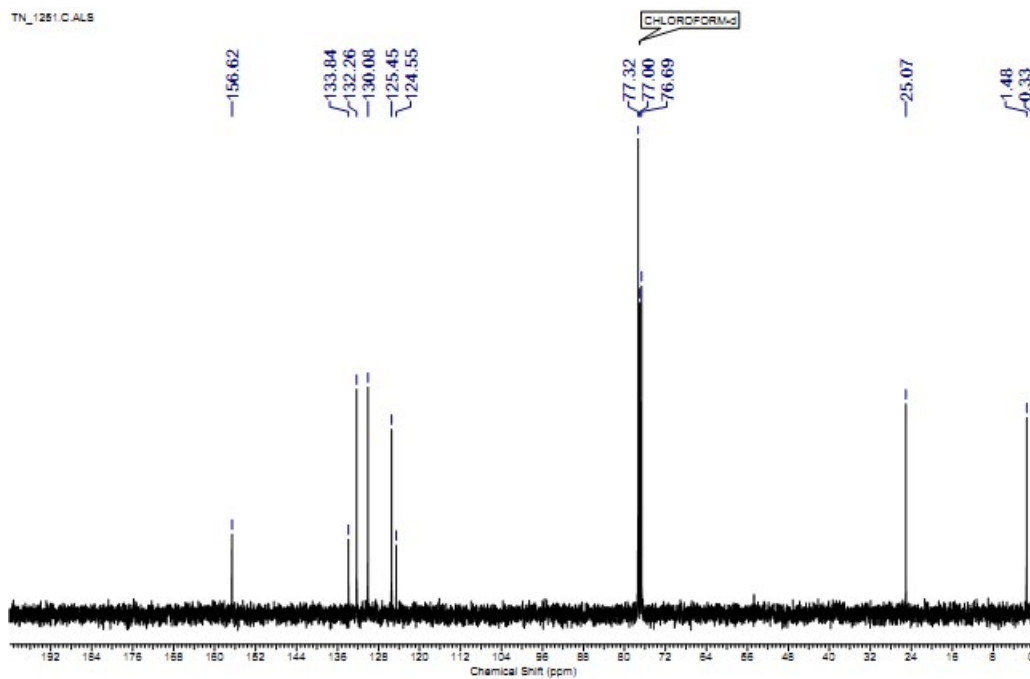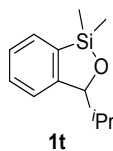

1221.STEP2.DISTILLED.ALS

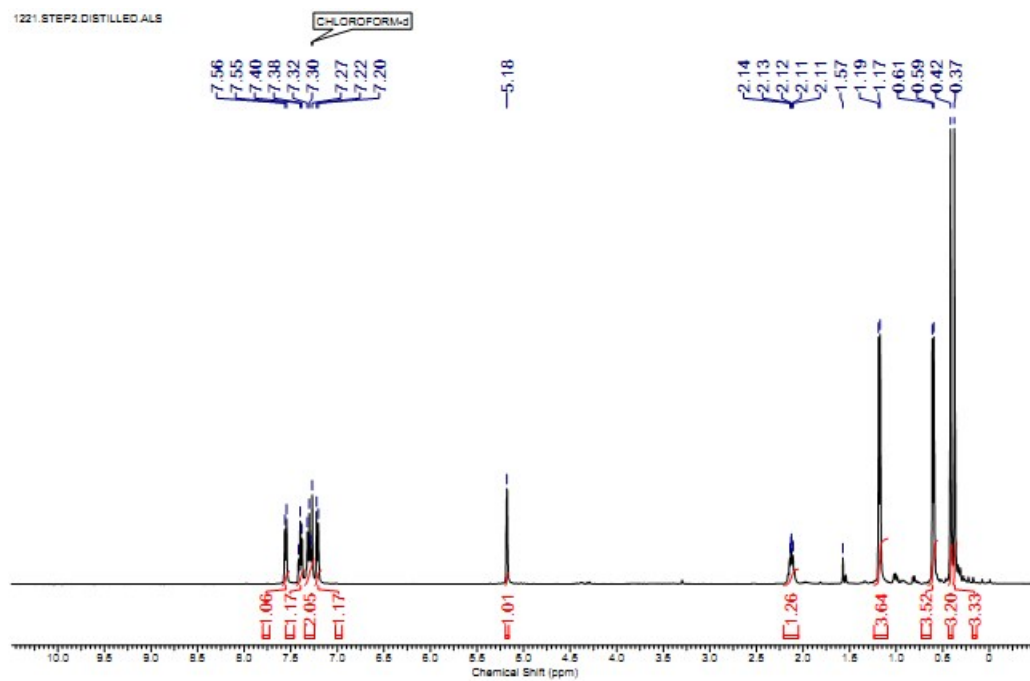

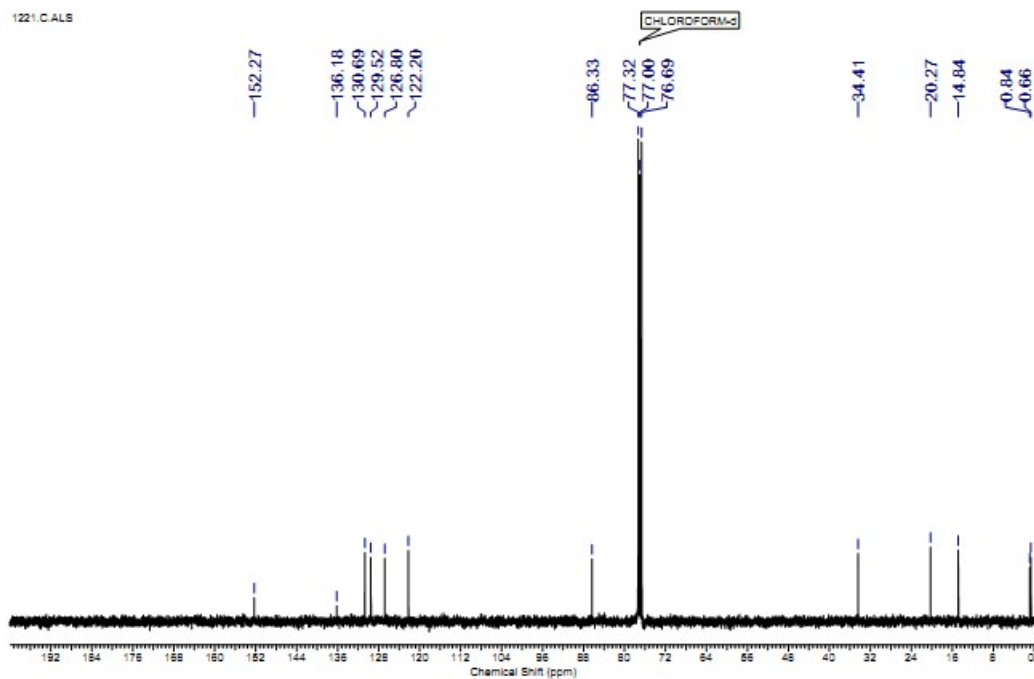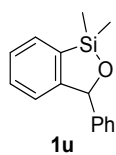

1201.COL-1.ALS

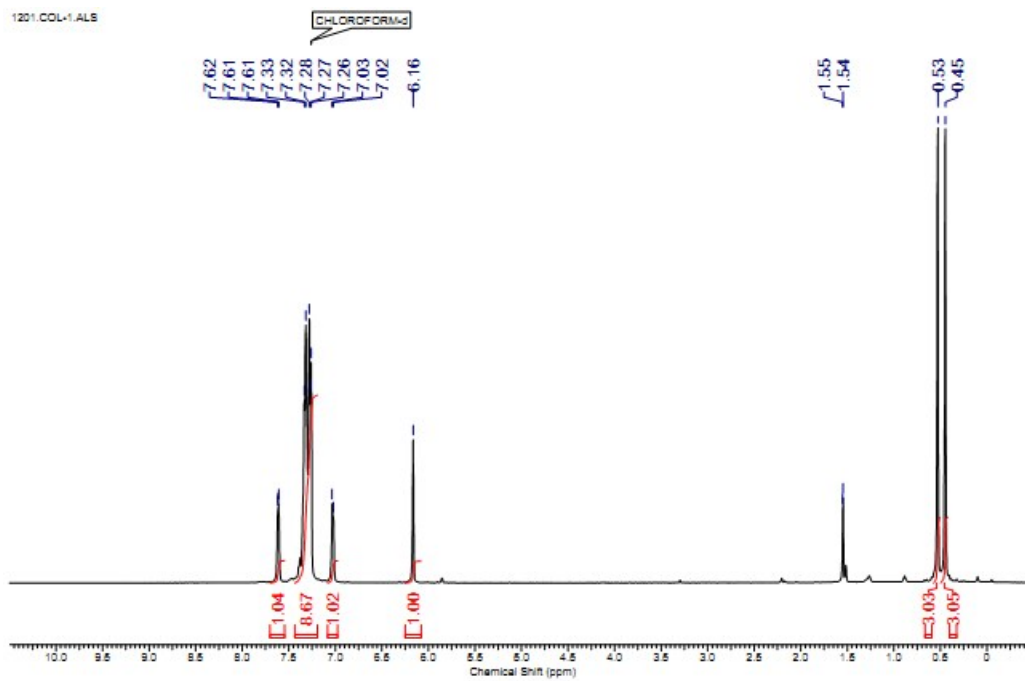

TN\_1424.C.ALS

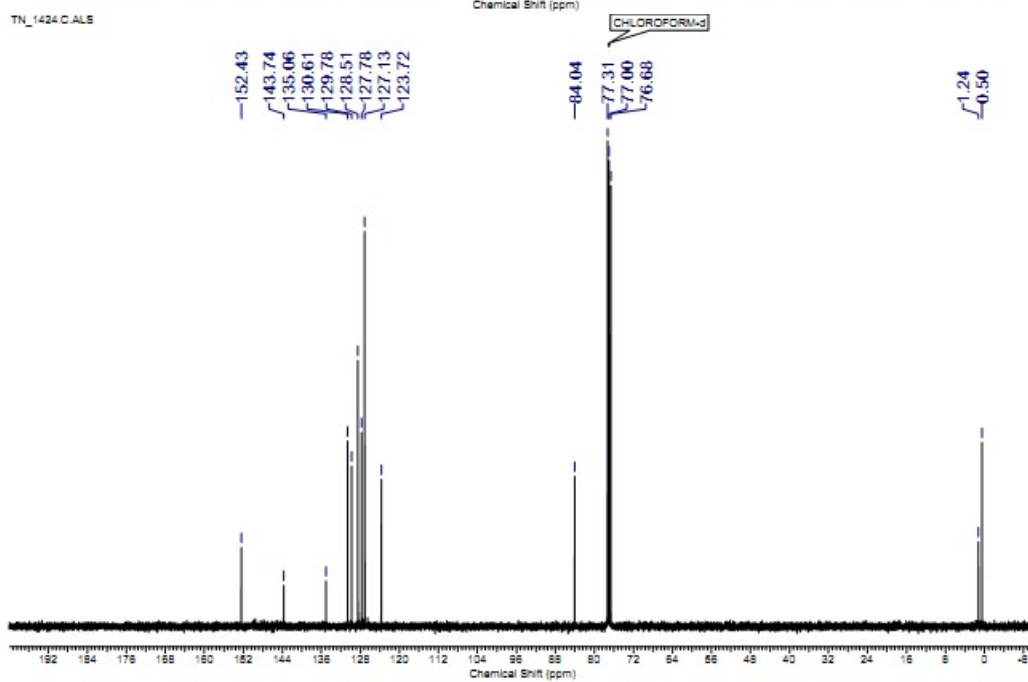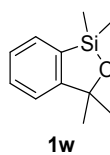

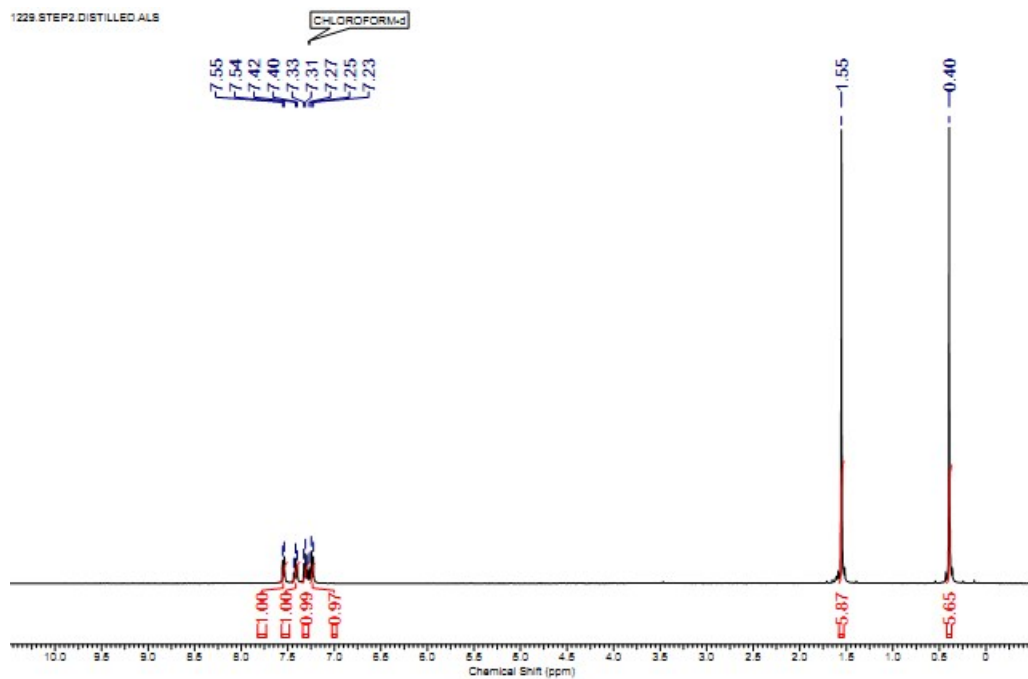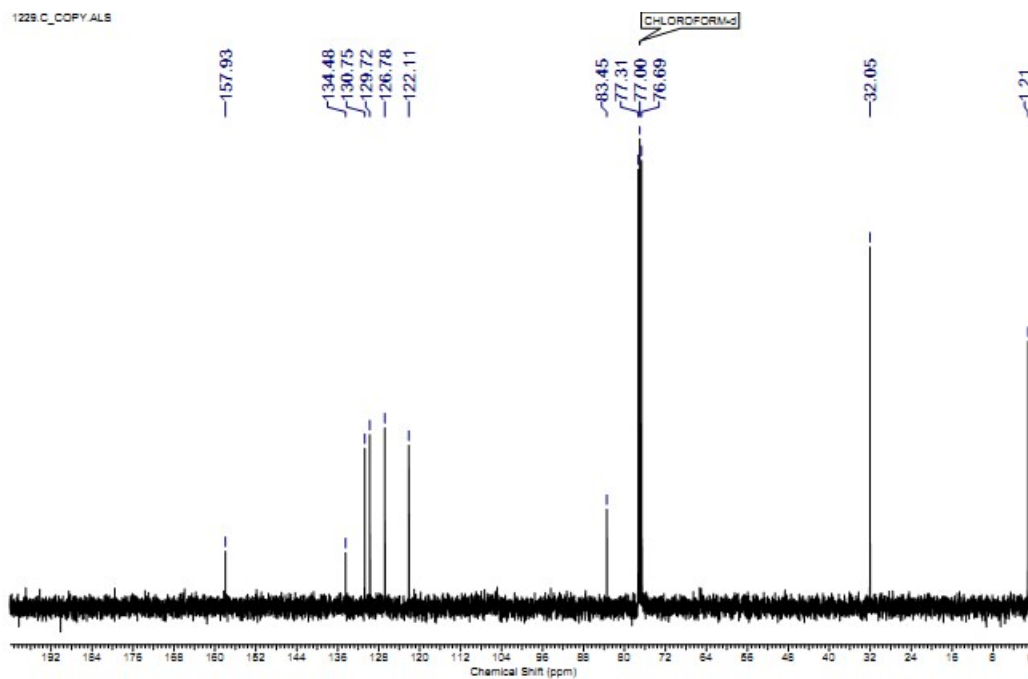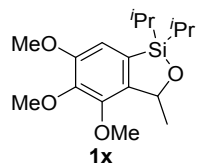

TN\_1355.CCL-7.ALS

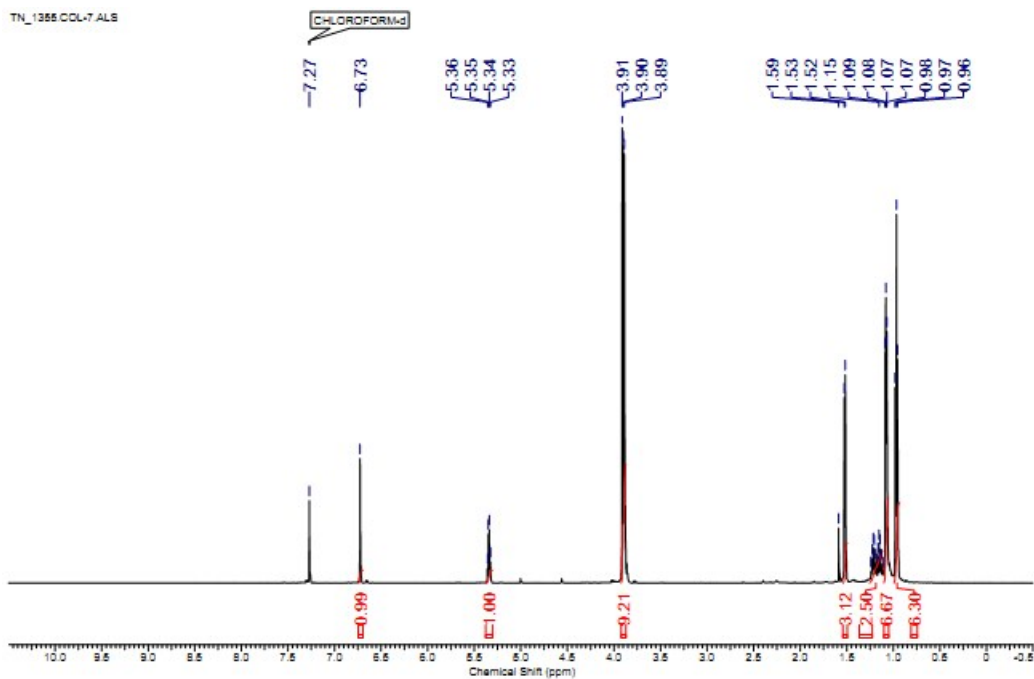

TN\_1355.C-1.ALS

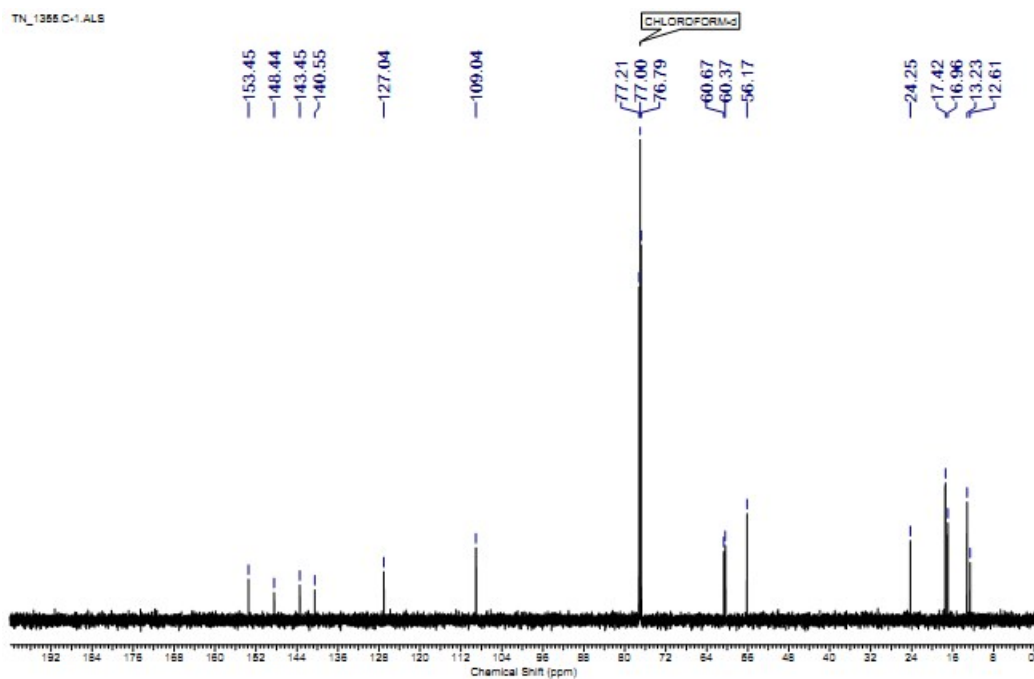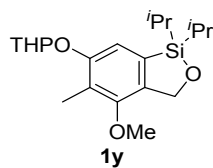

TN\_1318 STEP2.COL-1.ALS

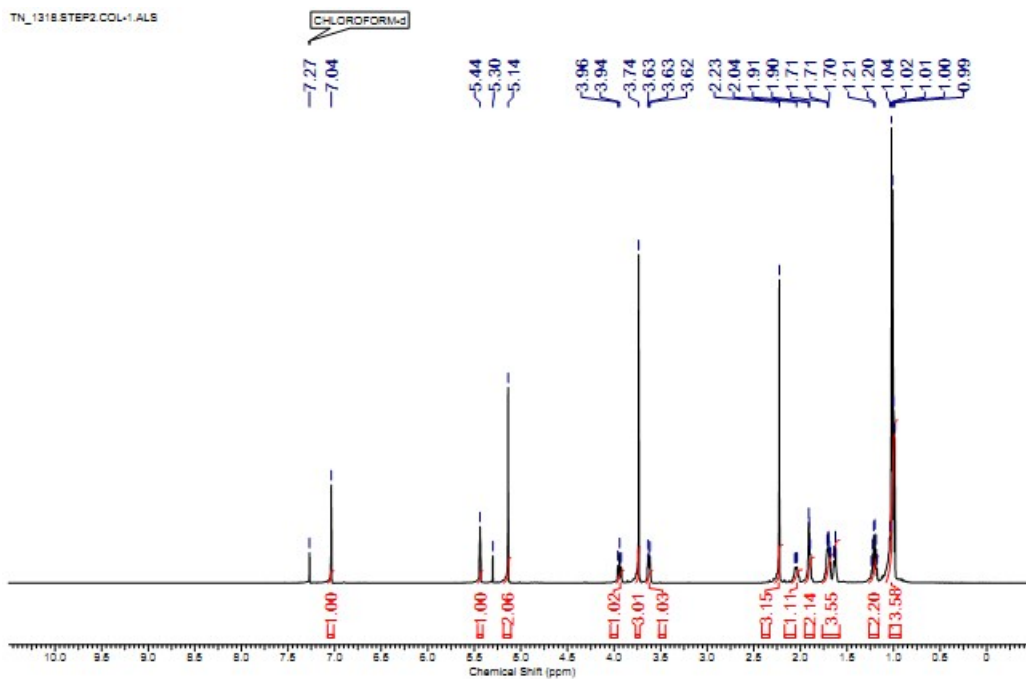

TN\_1318.C-1.ALS

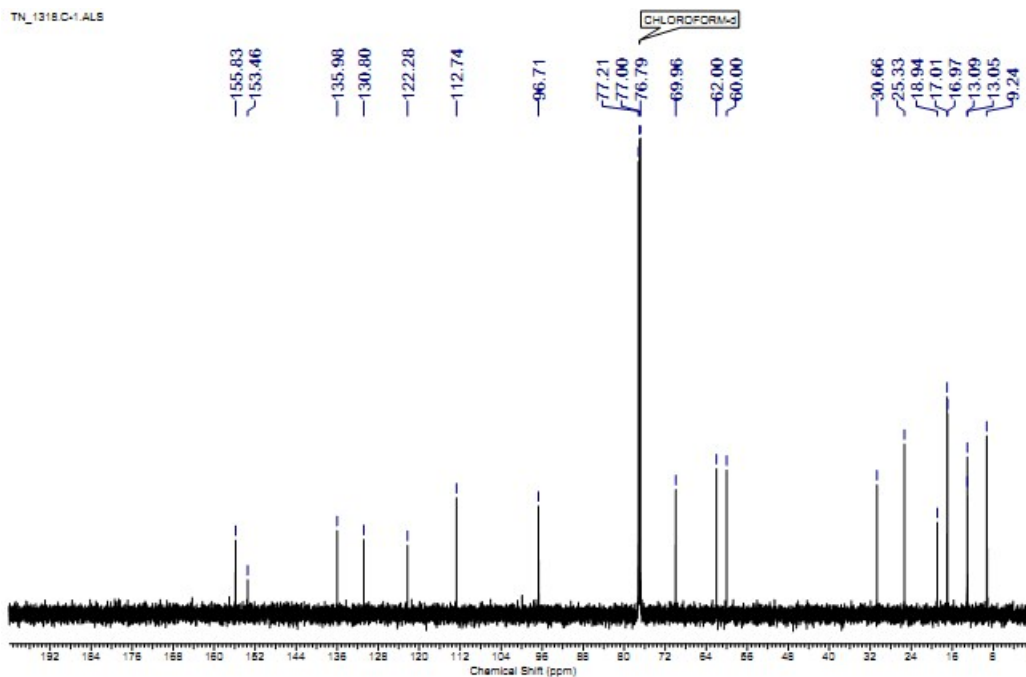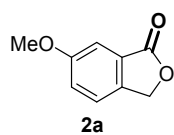

TN\_1314.CCL-1.ALS

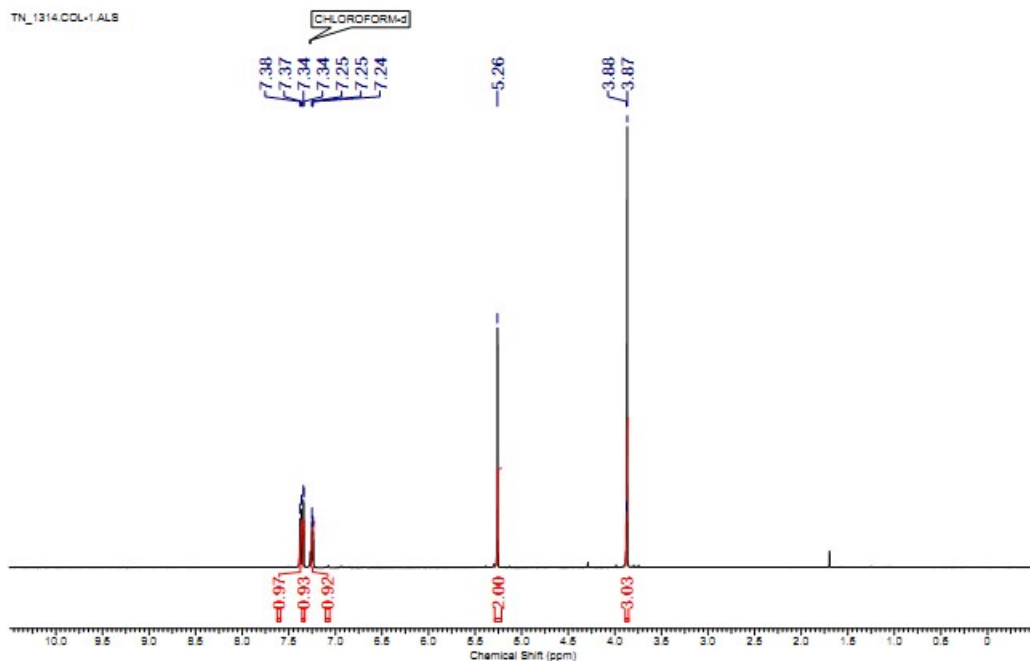

TN\_1314.C-1.ALS

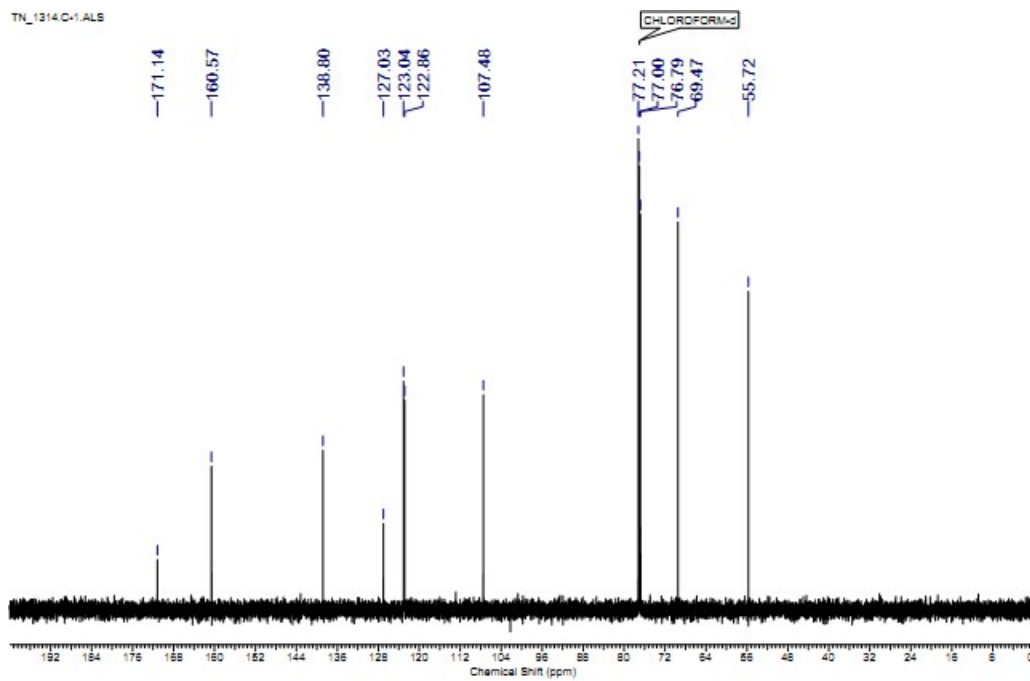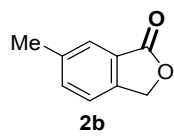



TN\_1414 ISOLATED ALS

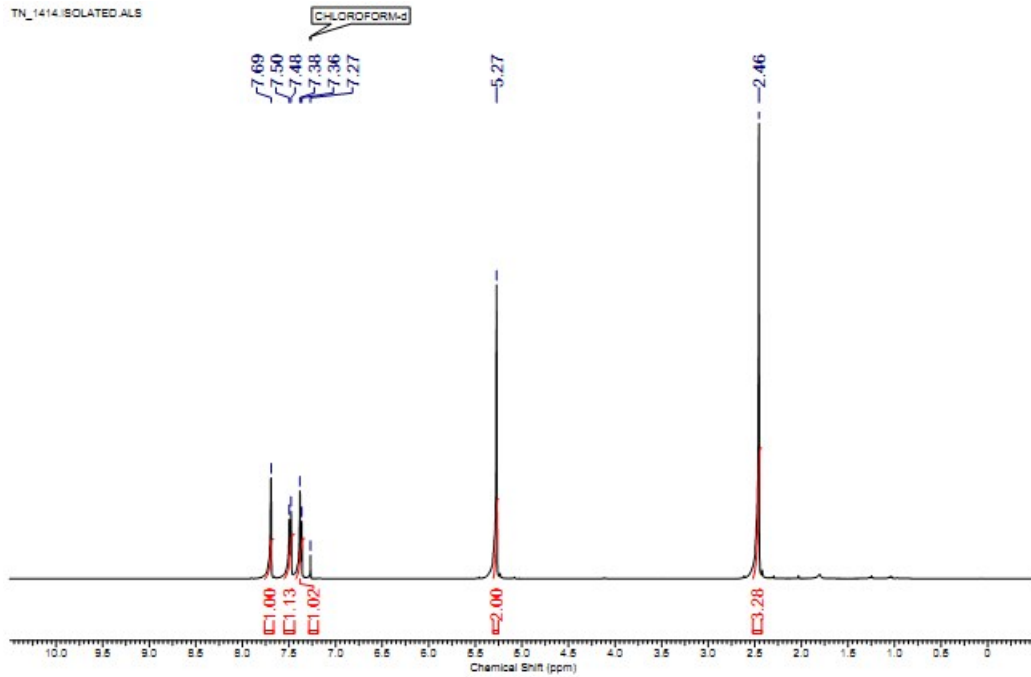

TN\_1414 C ALS

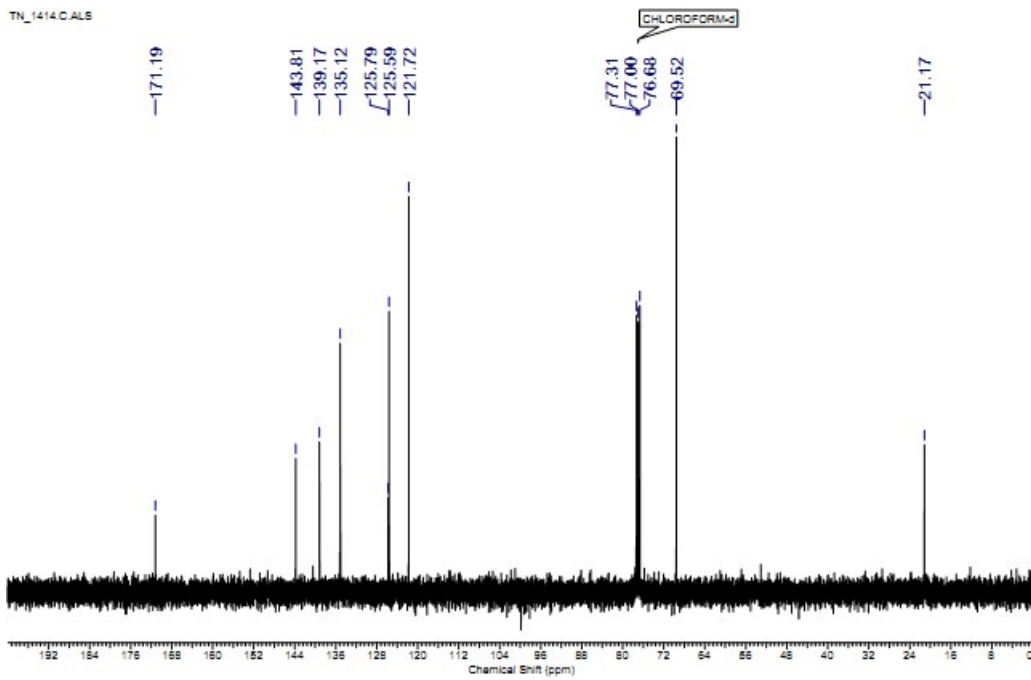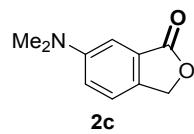

TN\_1368 ISOLATED ALS

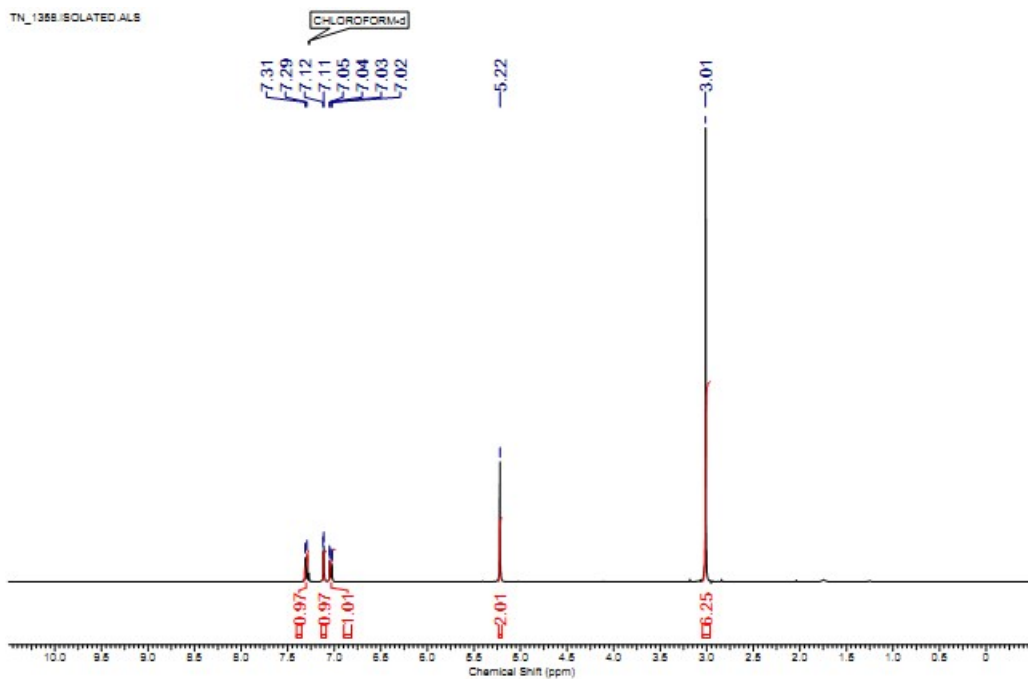

TN\_1368 C ALS

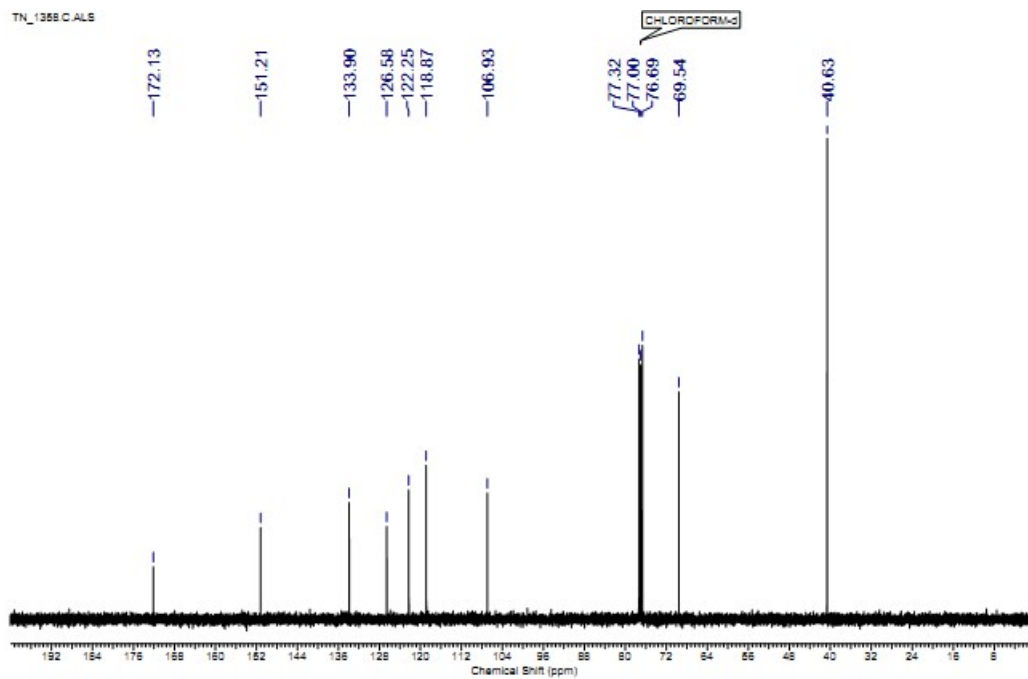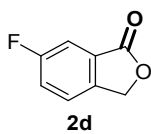

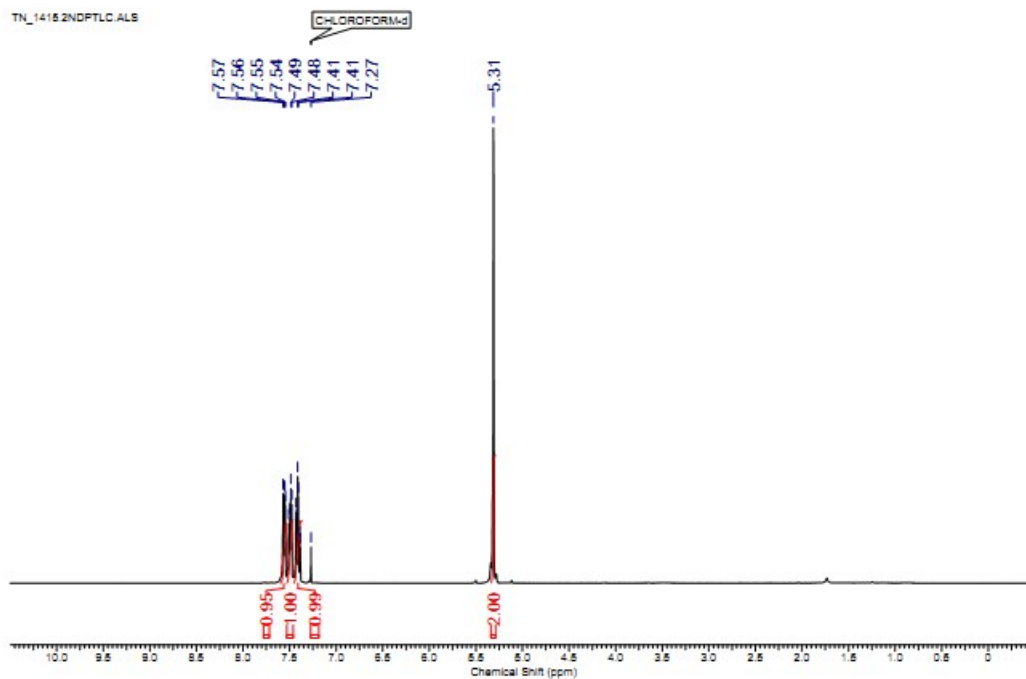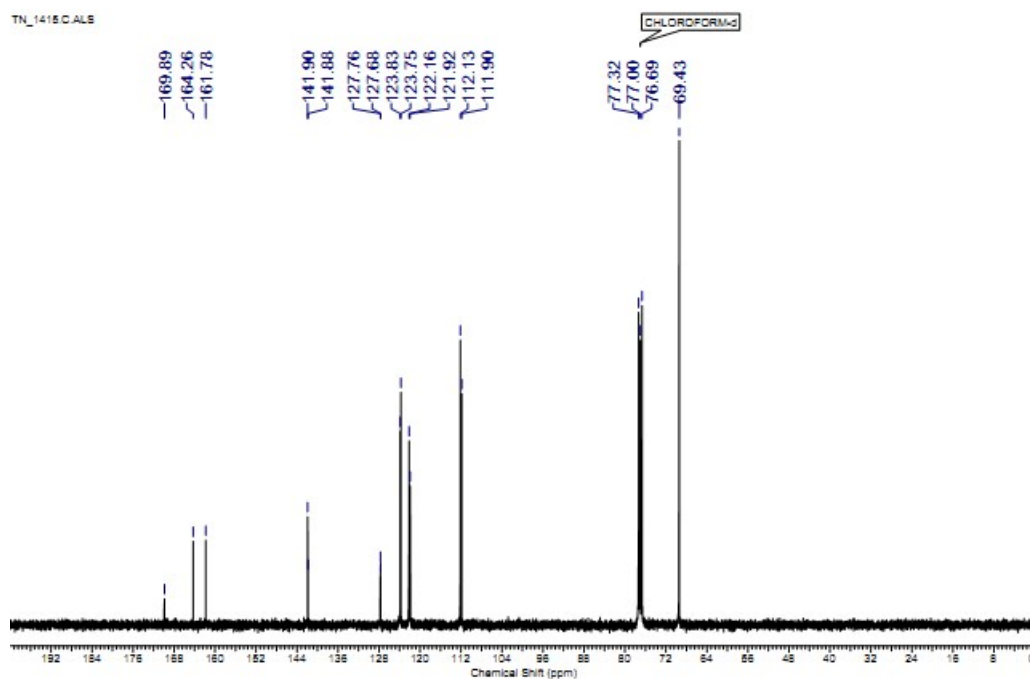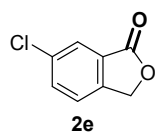

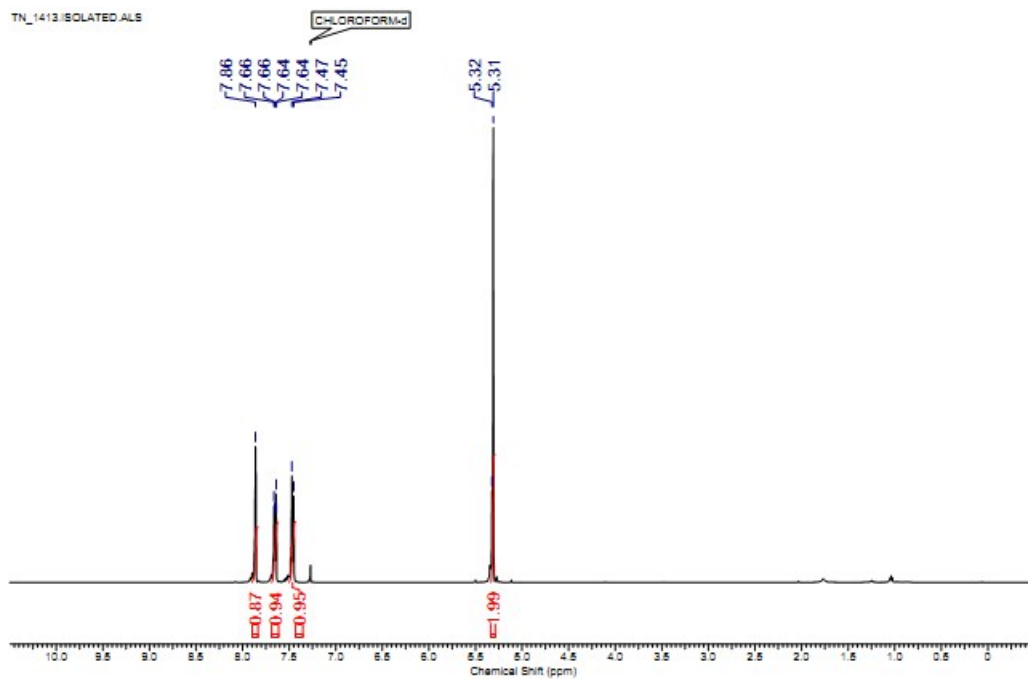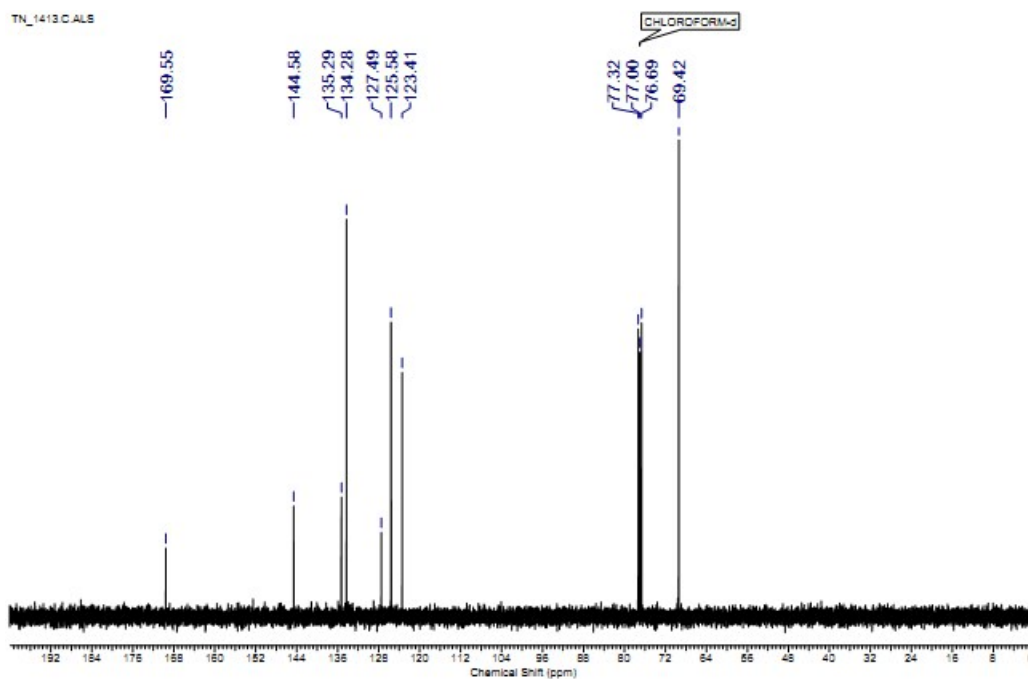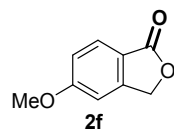

TN\_1351.PTLC-1.ALS

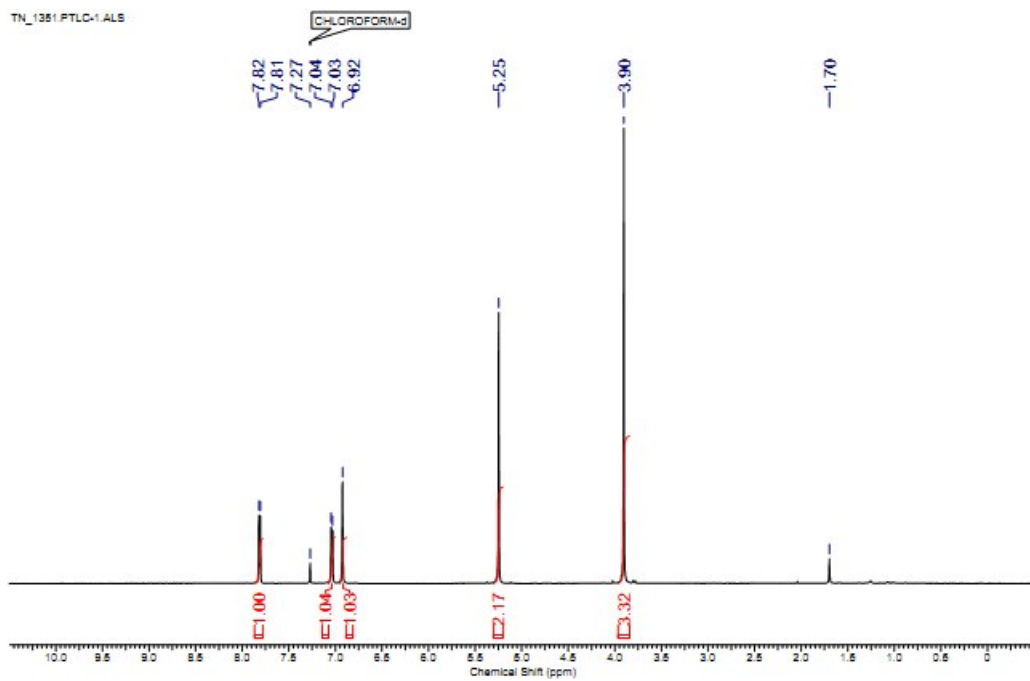

TN\_1351.C-2.ALS

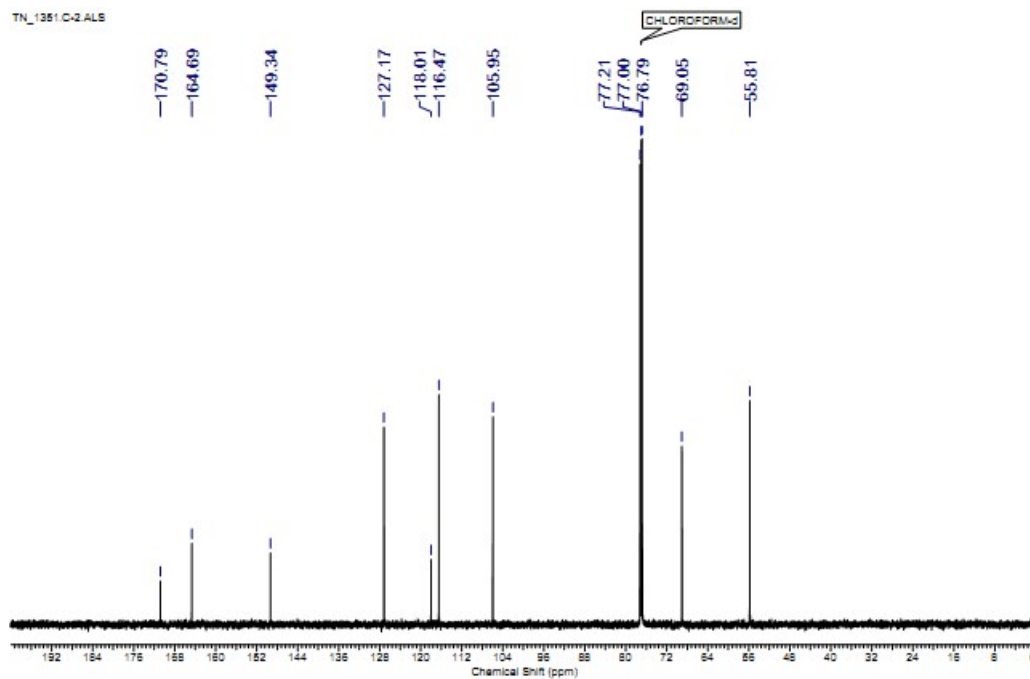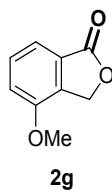

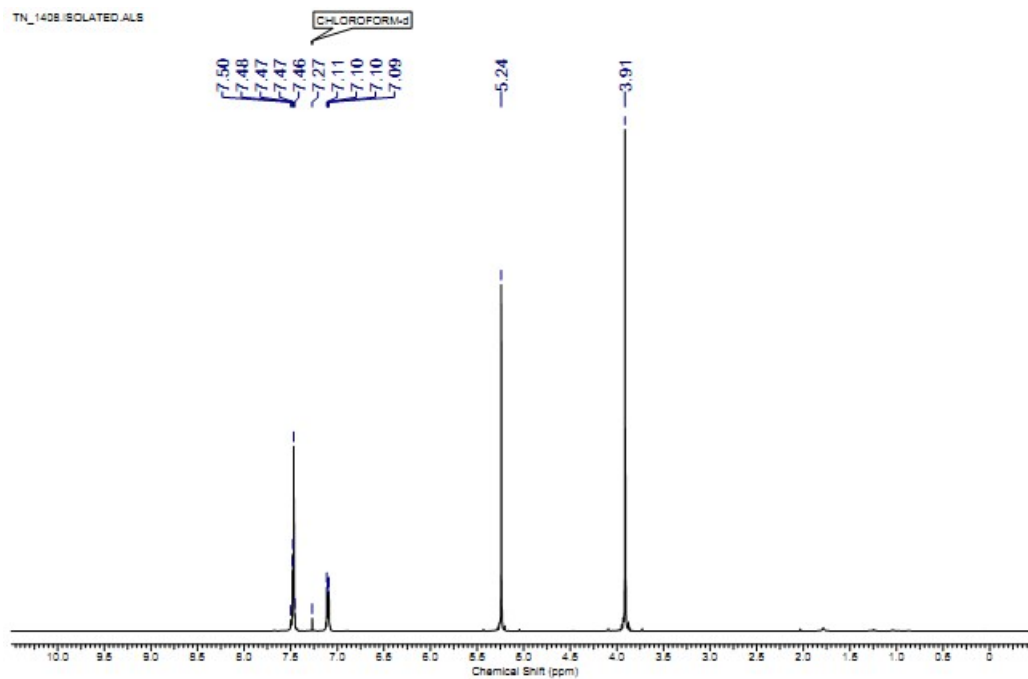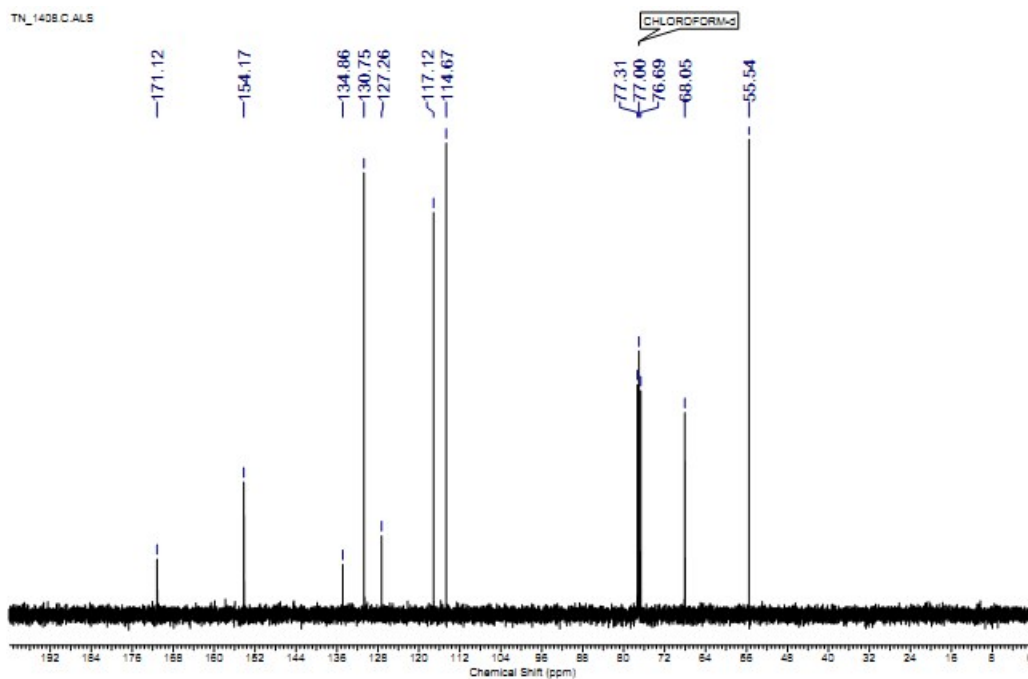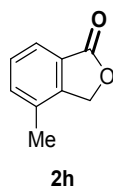

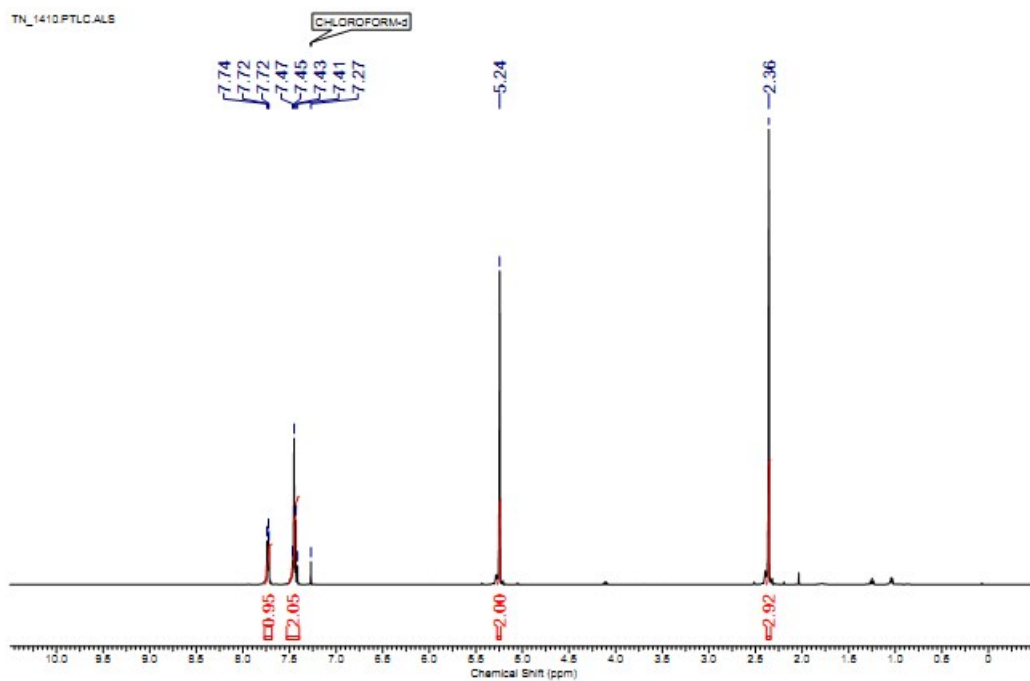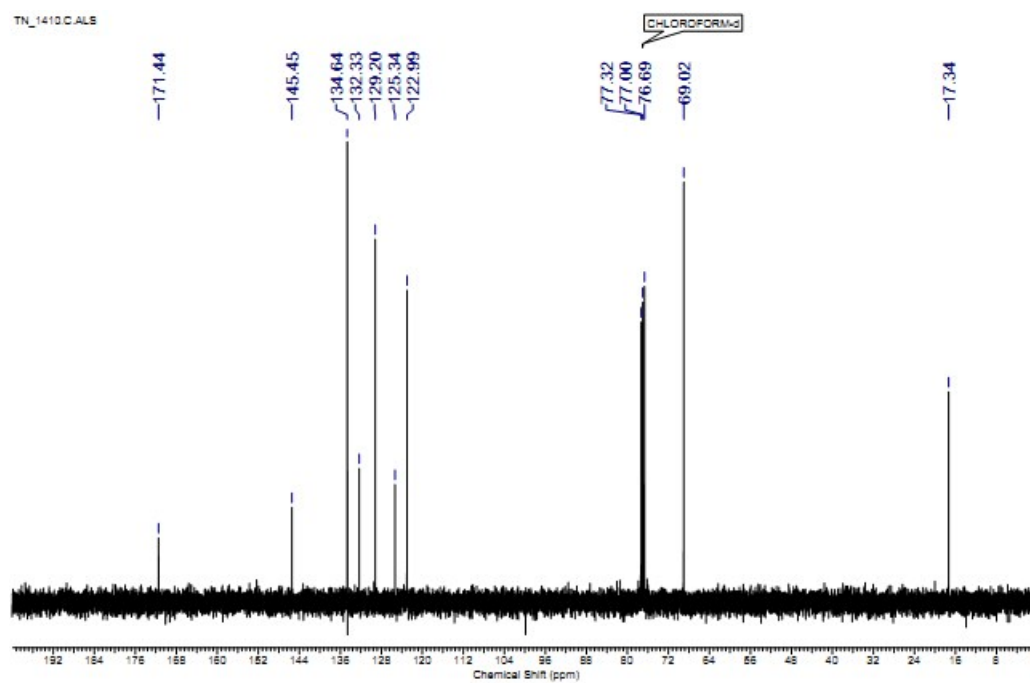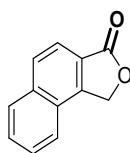

2i

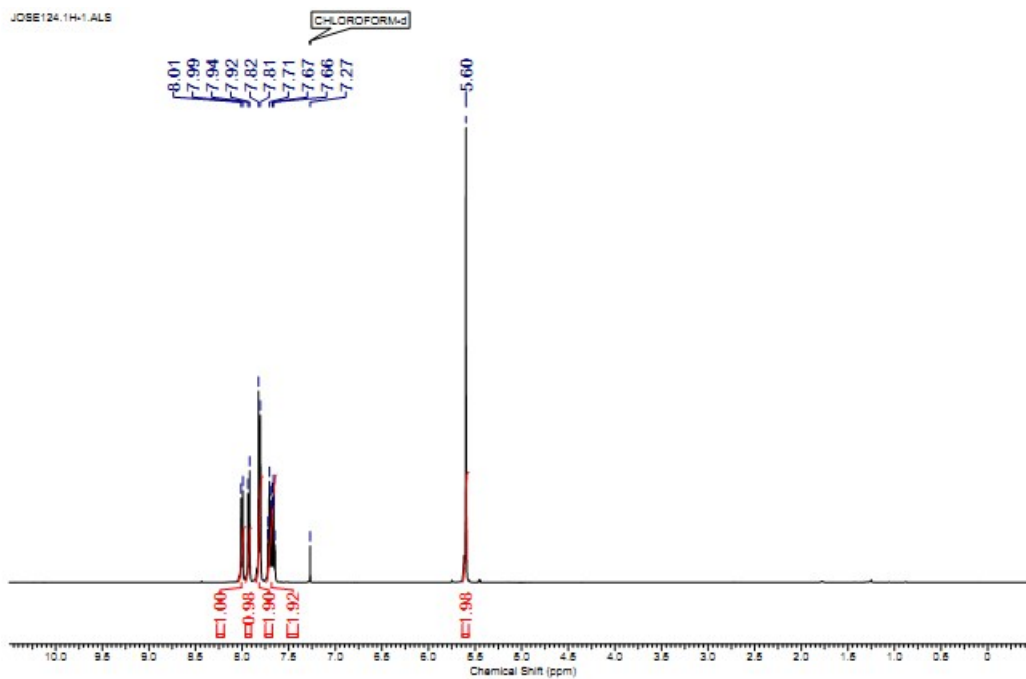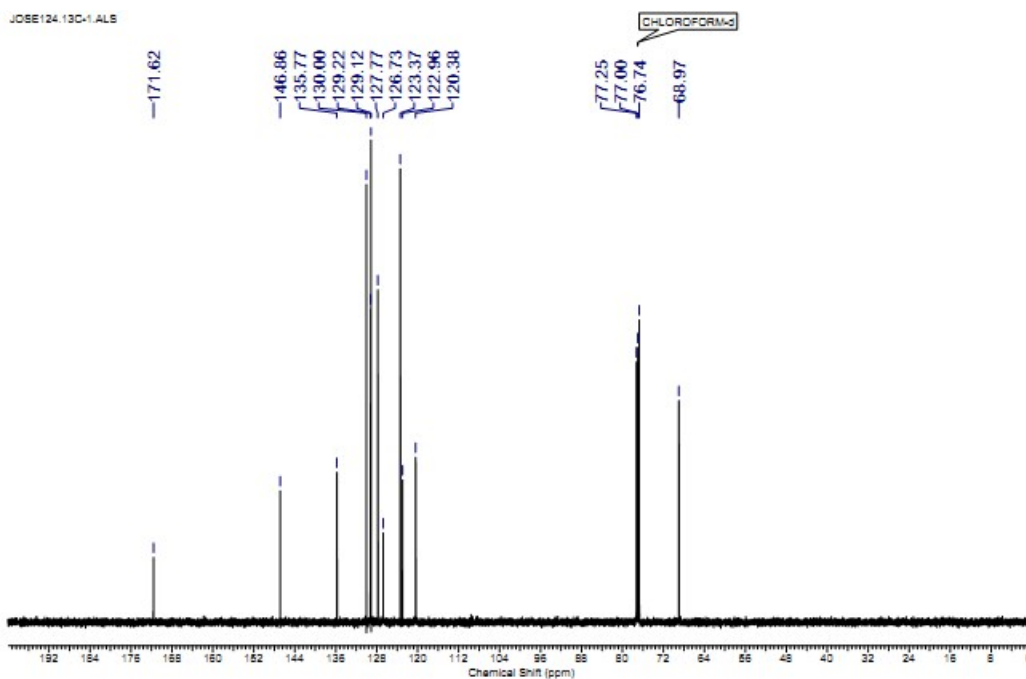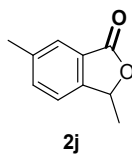



TN\_1254 ISOLATED ALS

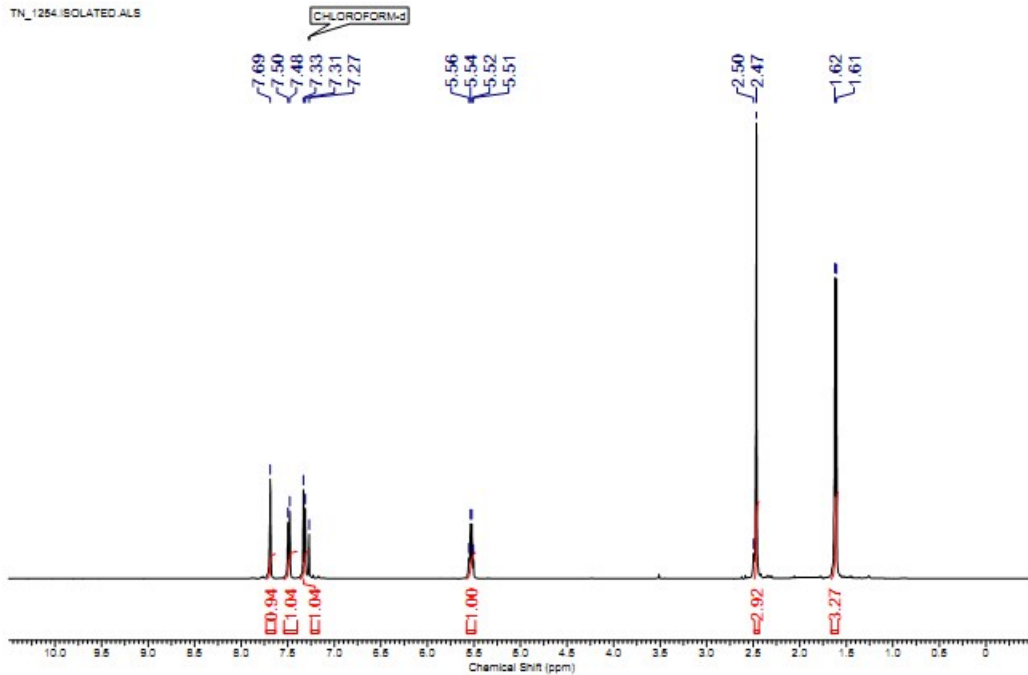

TN\_1254 C.ALS

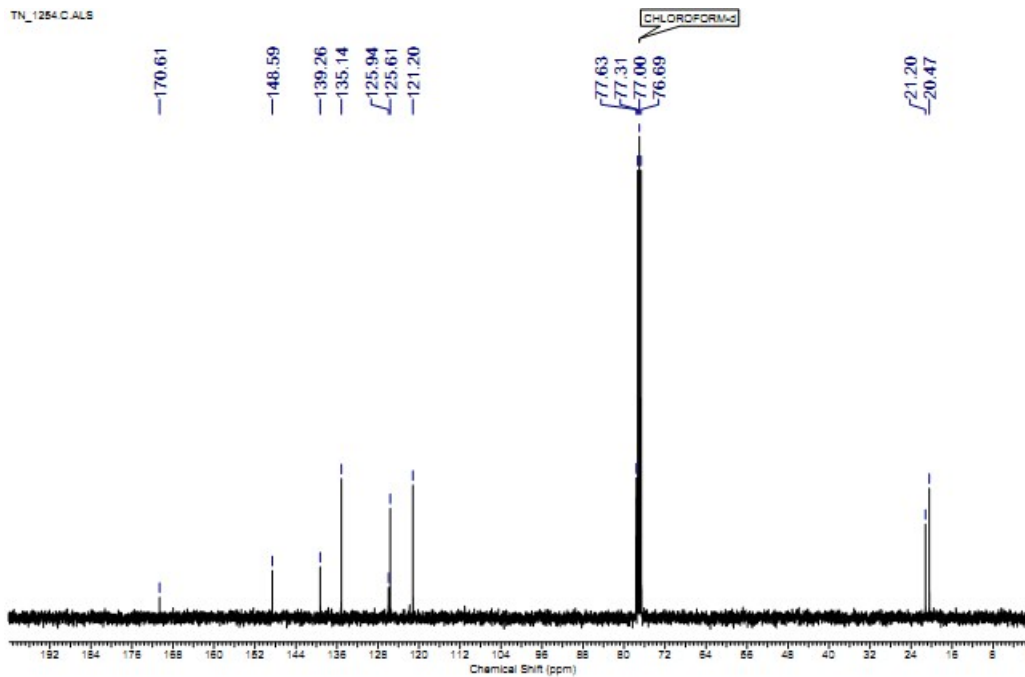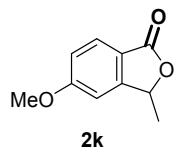

TN\_1418 ISOLATED ALS

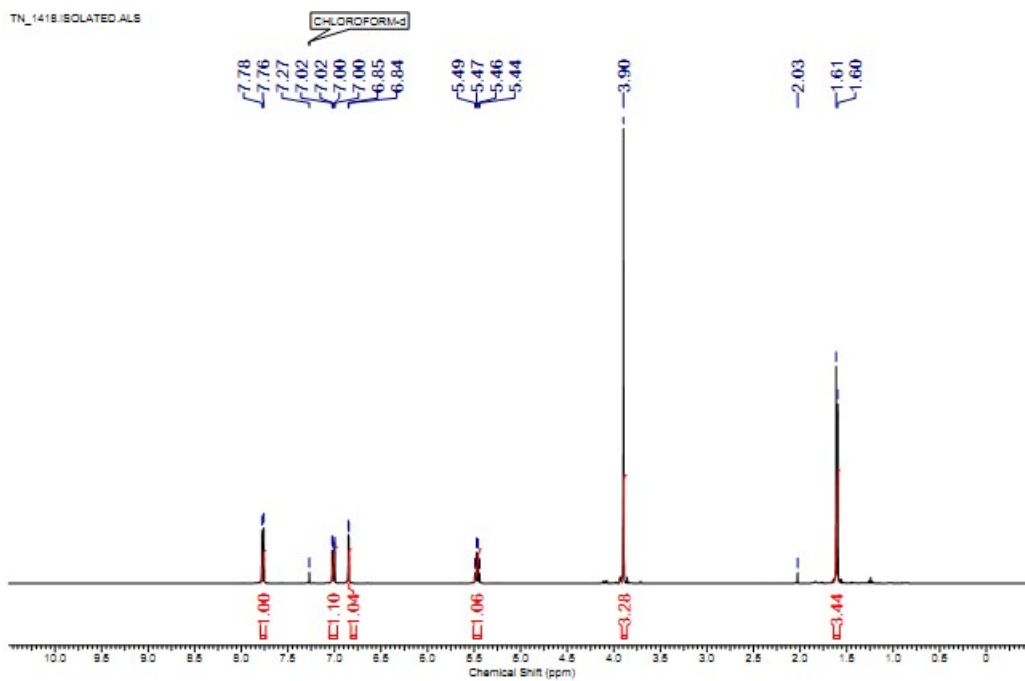

TN\_1418 C.ALS

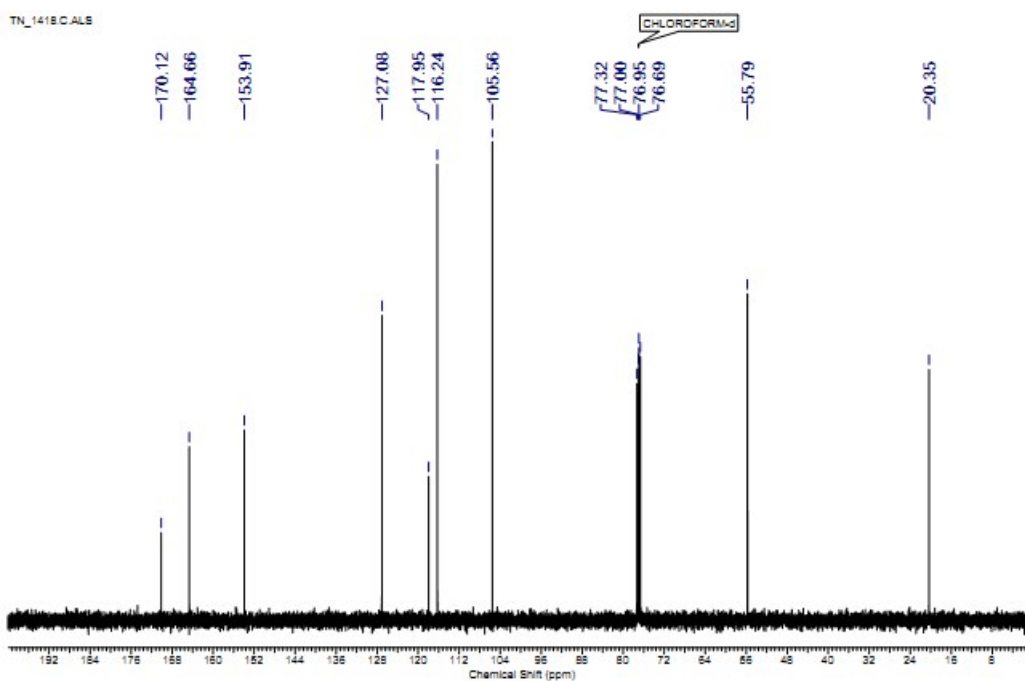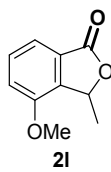

TN\_1419 ISOLATED ALS

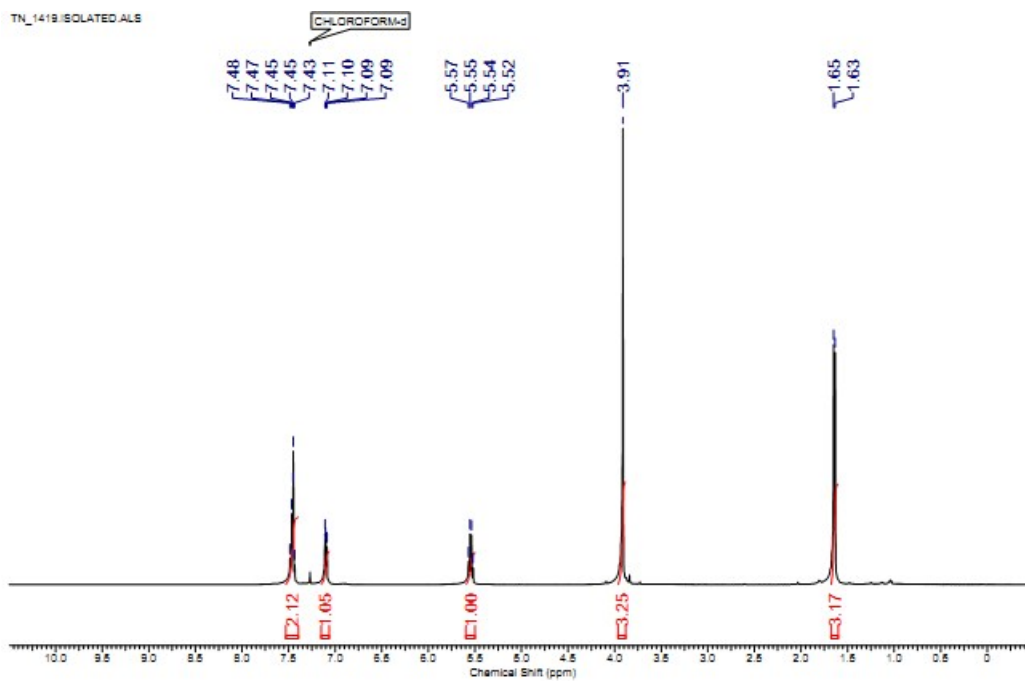

TN\_1419.C ALS

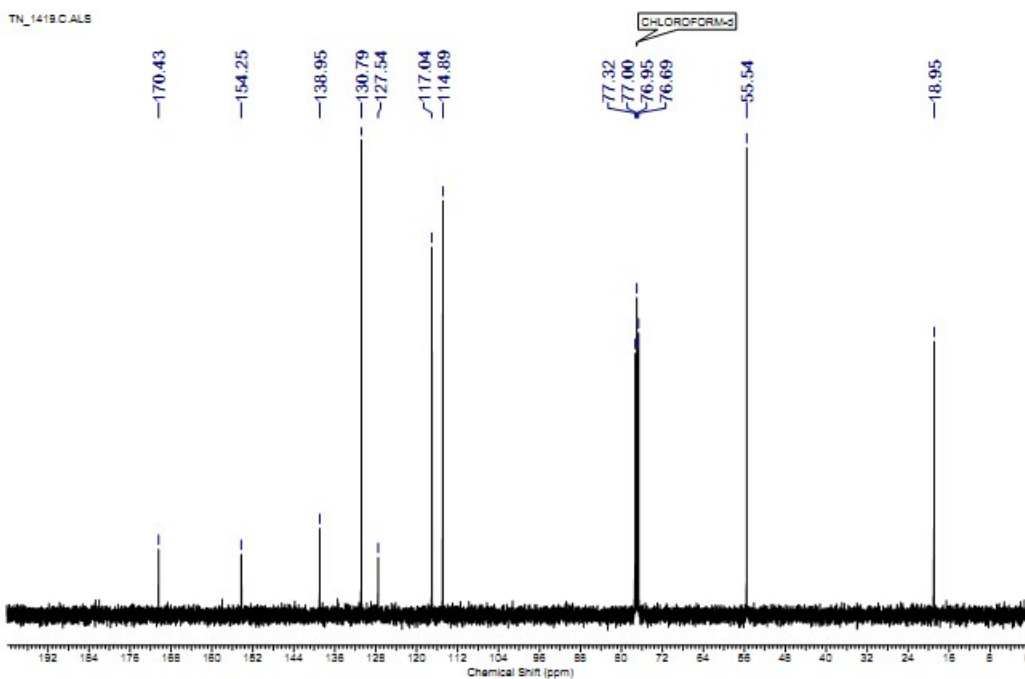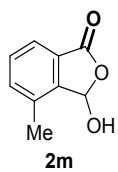

TN\_1452 ISOLATED CD3CO-1.E9F

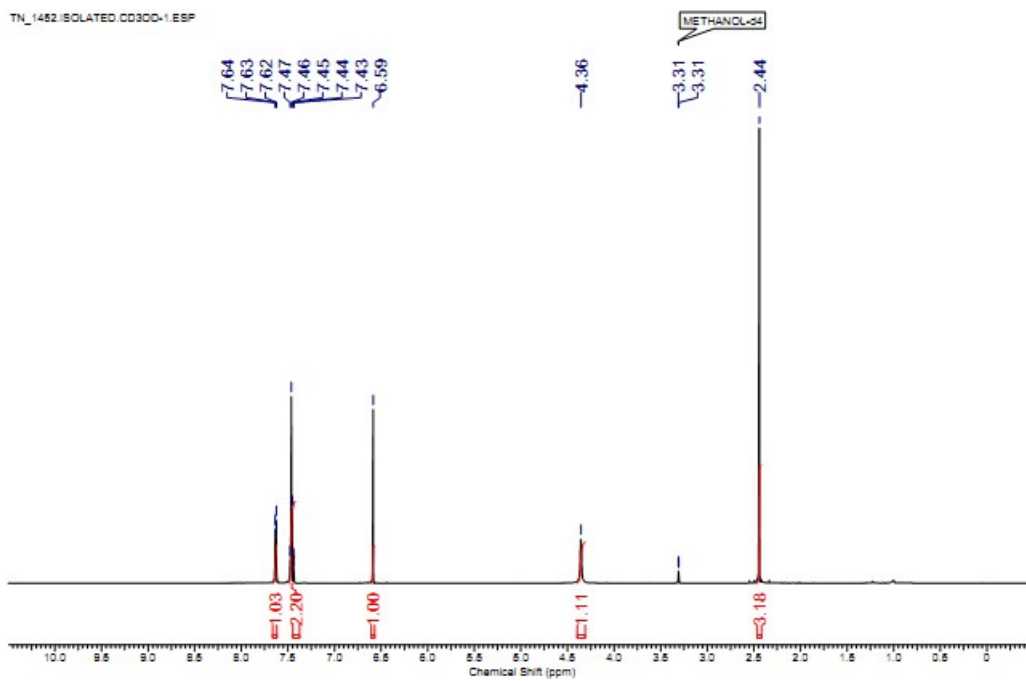

TN\_1452 C2-1.ALS

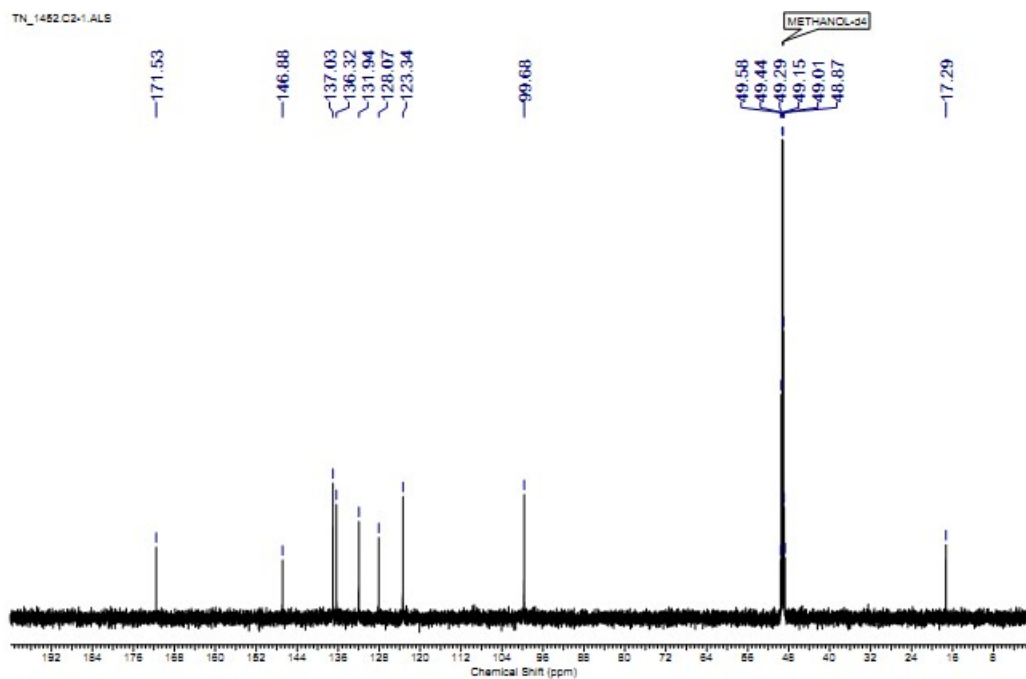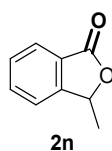

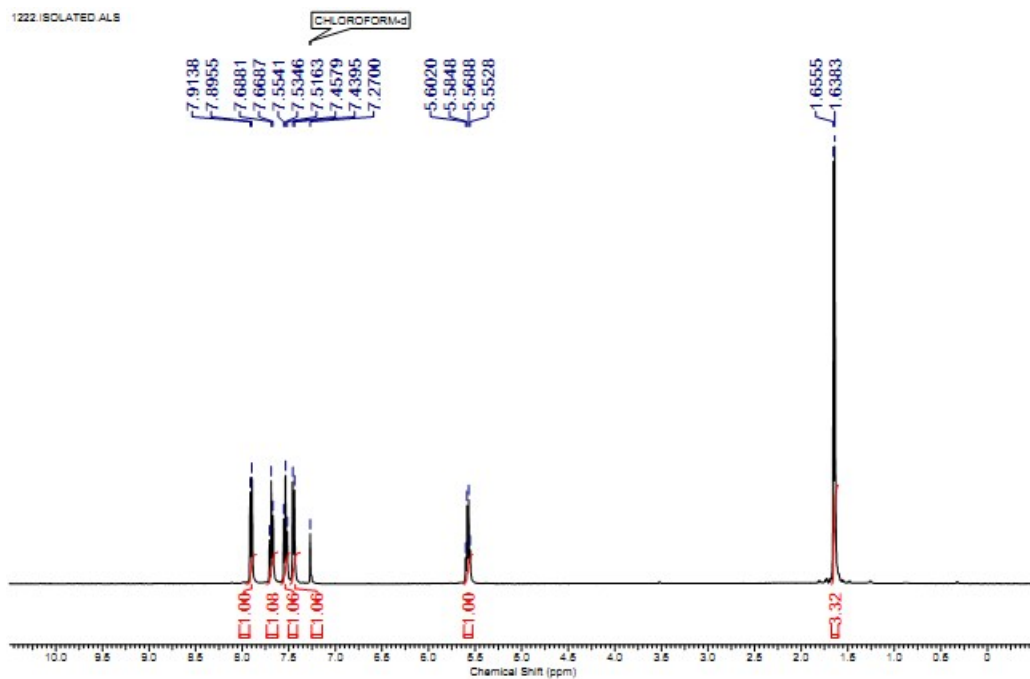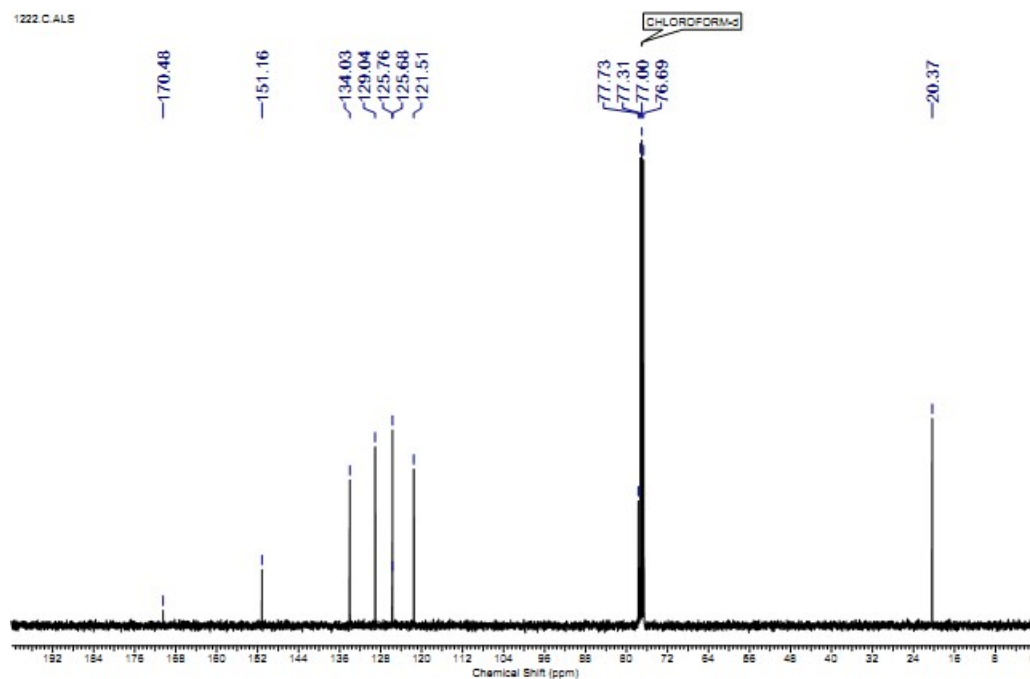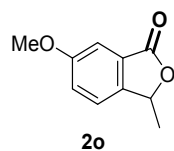

TN\_1259 ISOLATED ALS

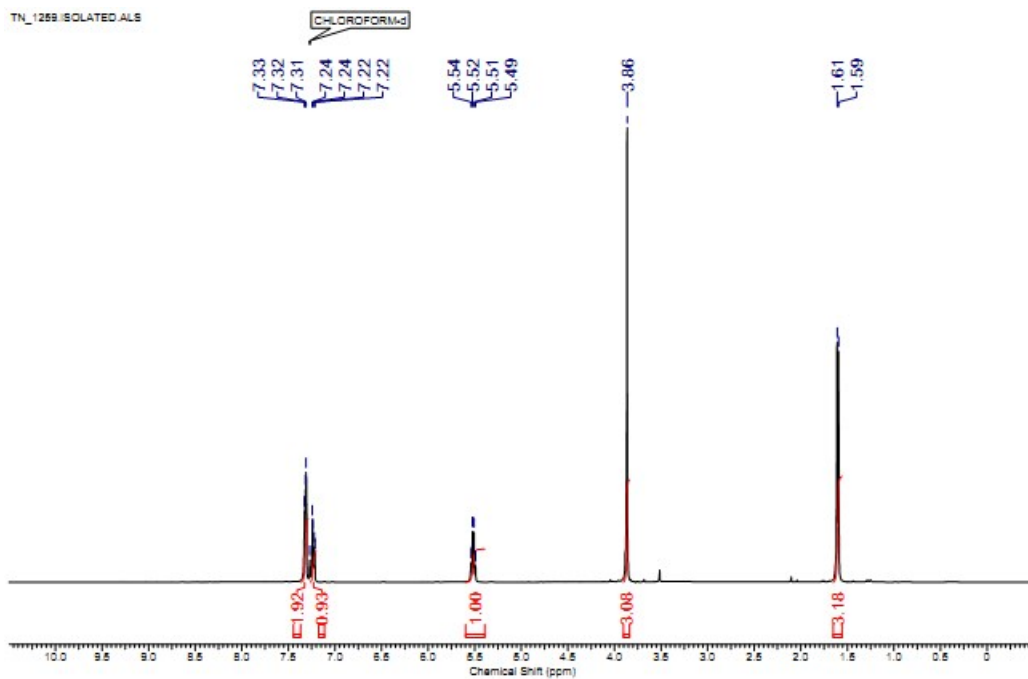

TN\_1259 C ALS

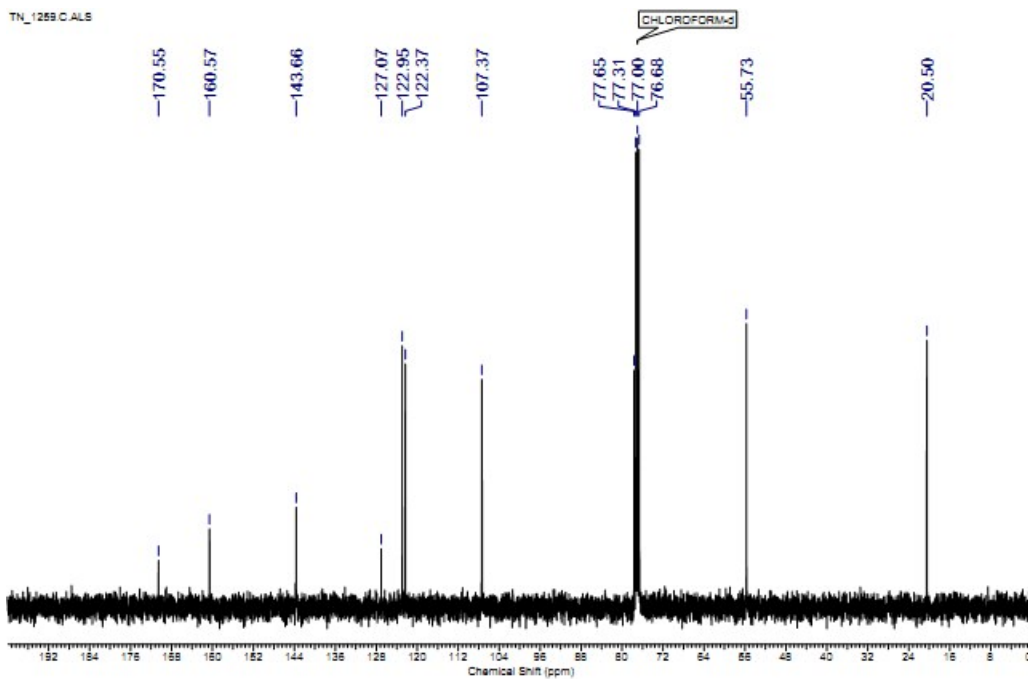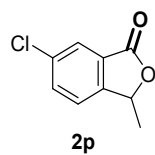

TN\_1255 ISOLATED ALS

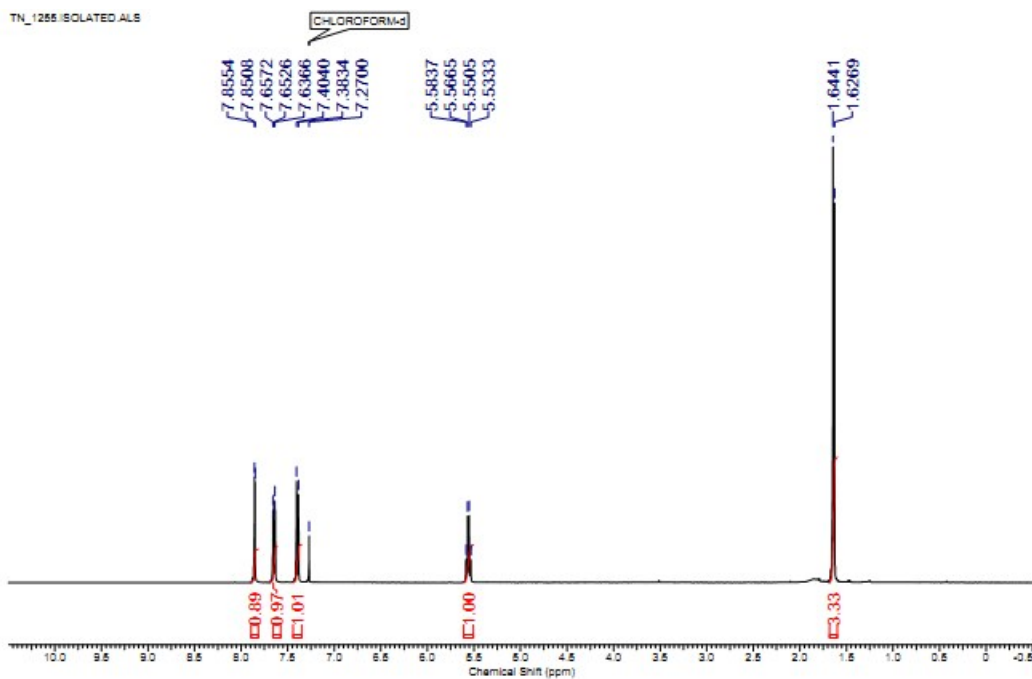

TN\_1255 C ALS

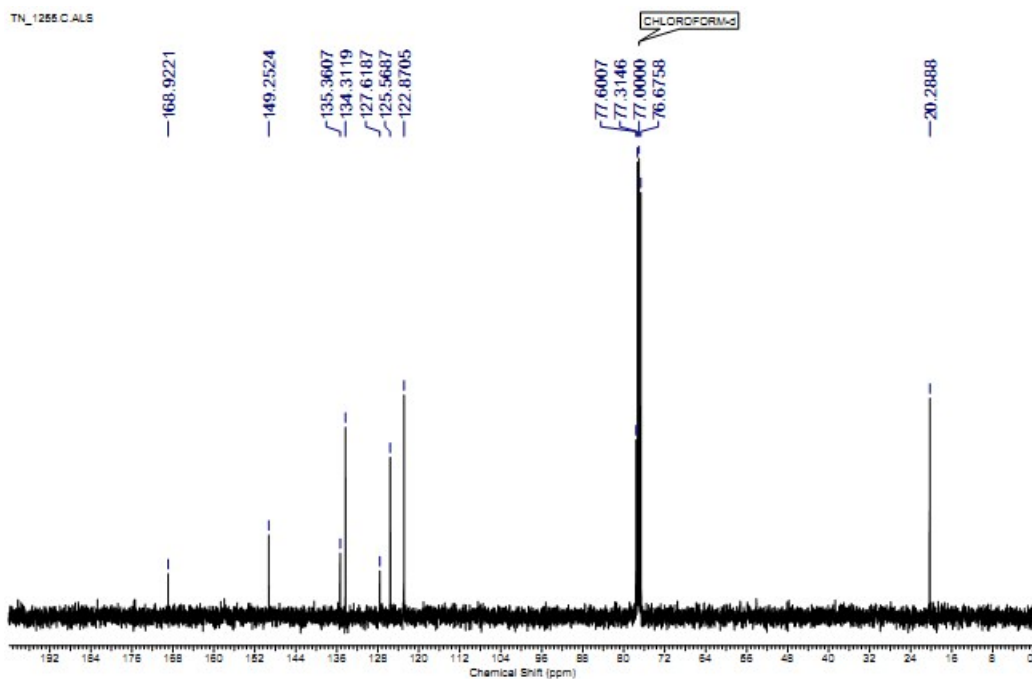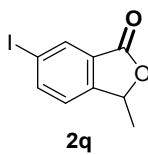

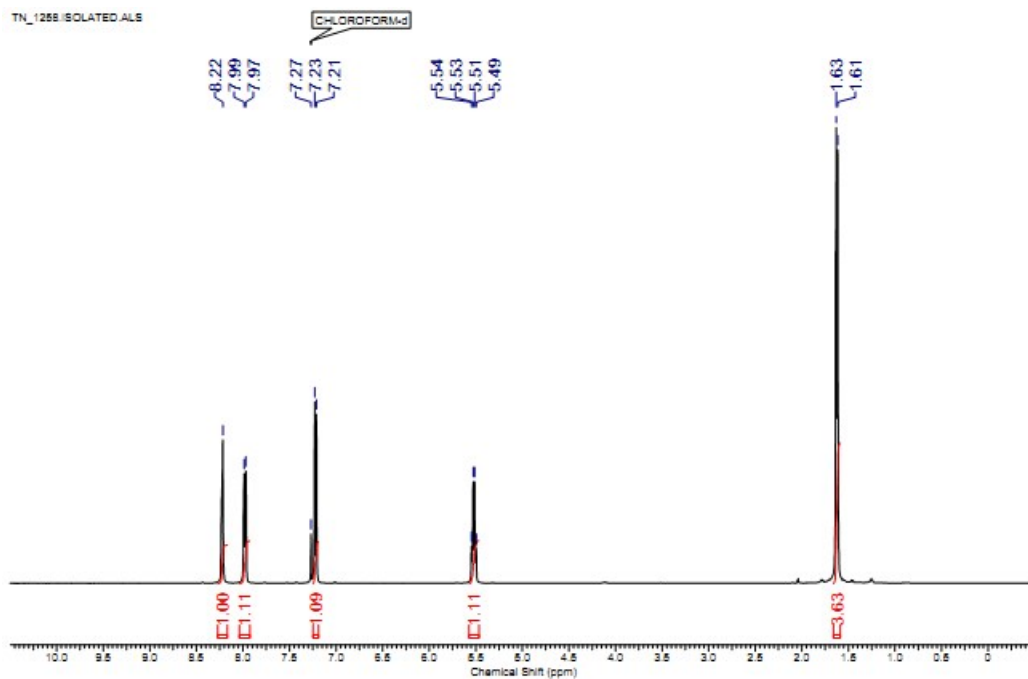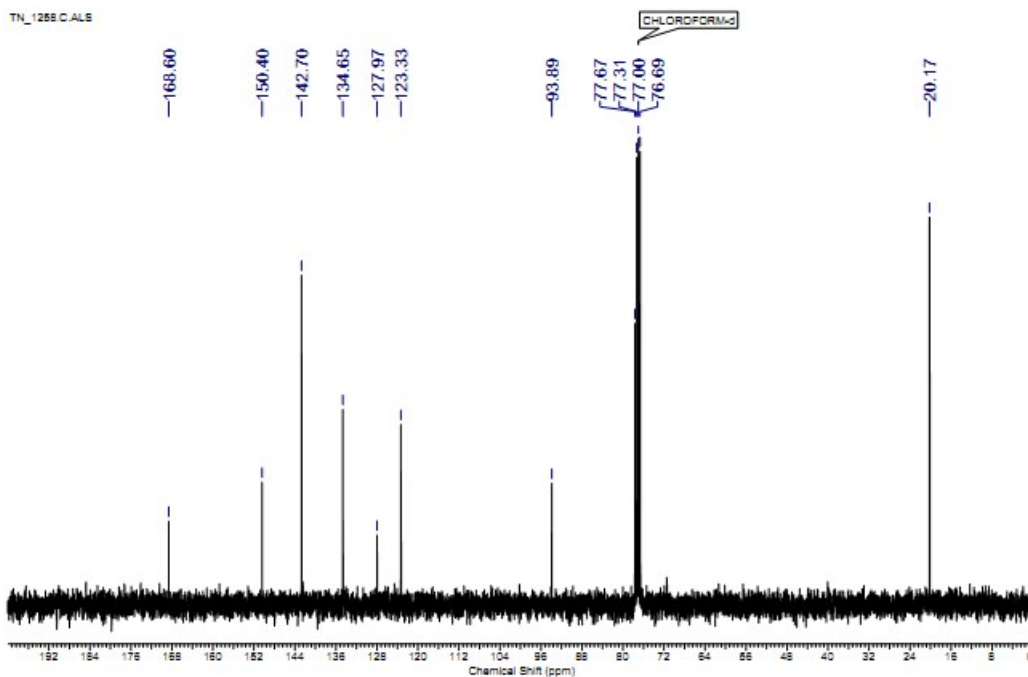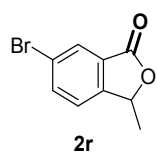



TN\_1232 ISOLATED ALS

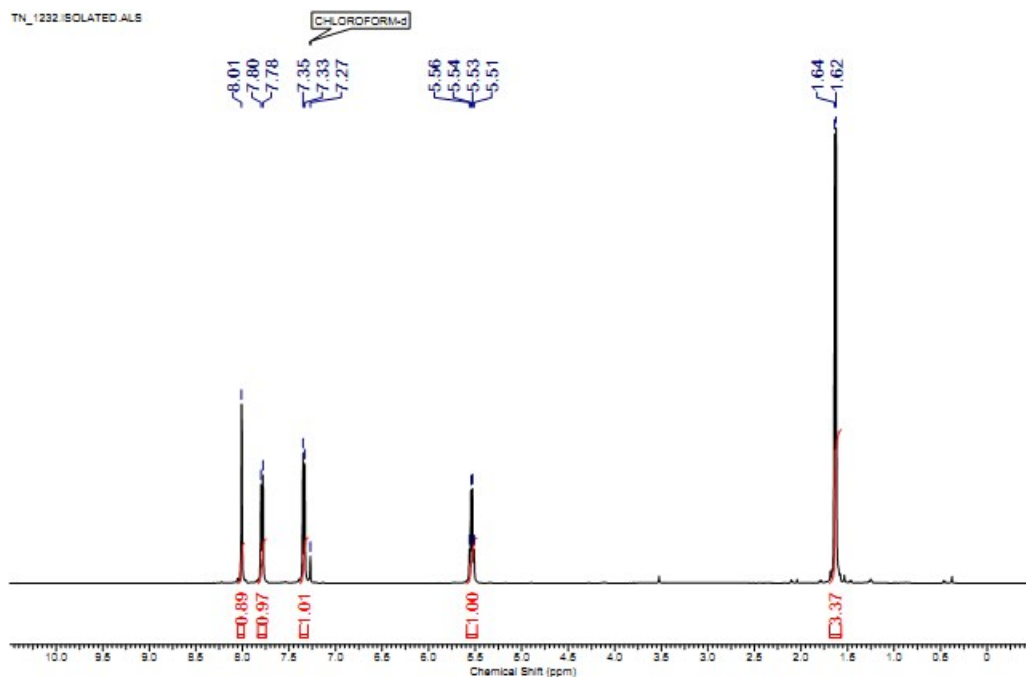

TN\_1232 C.ALS

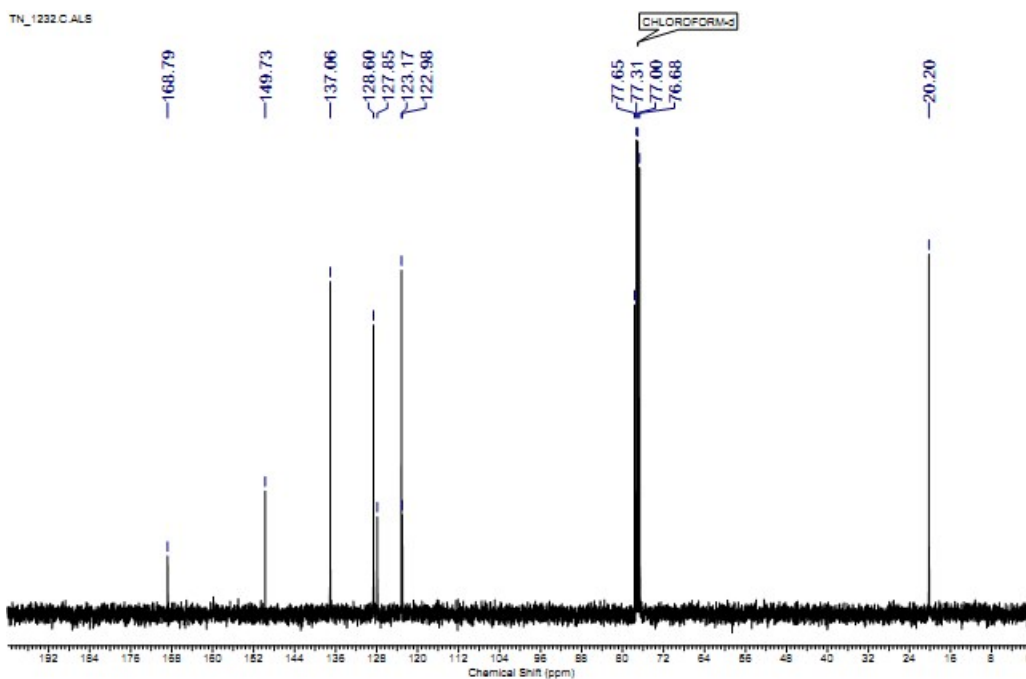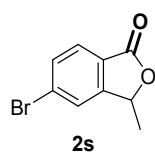

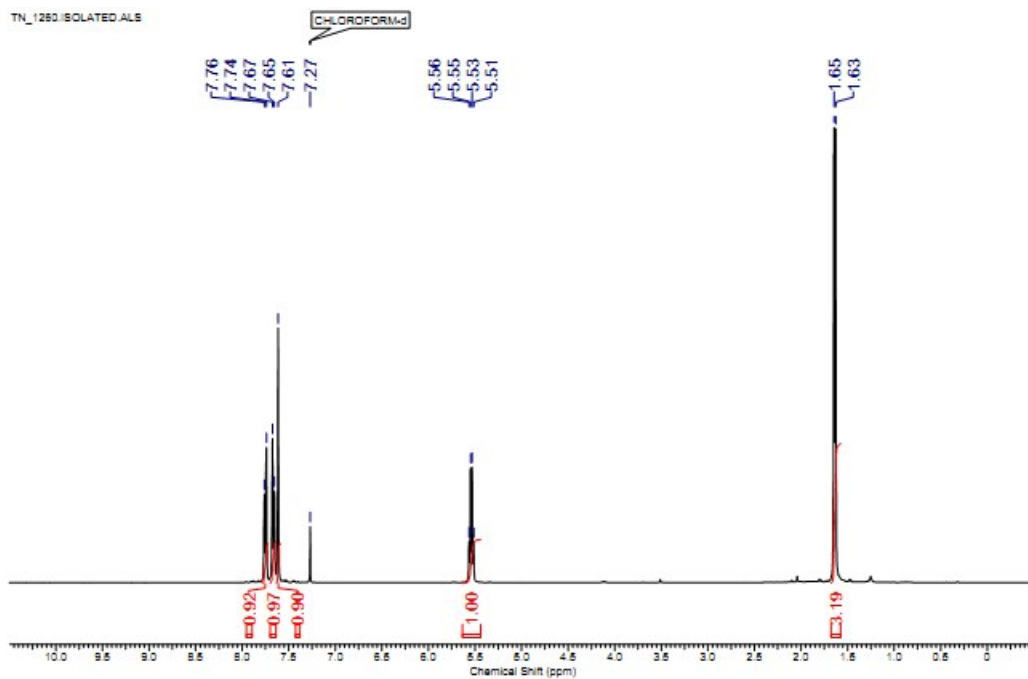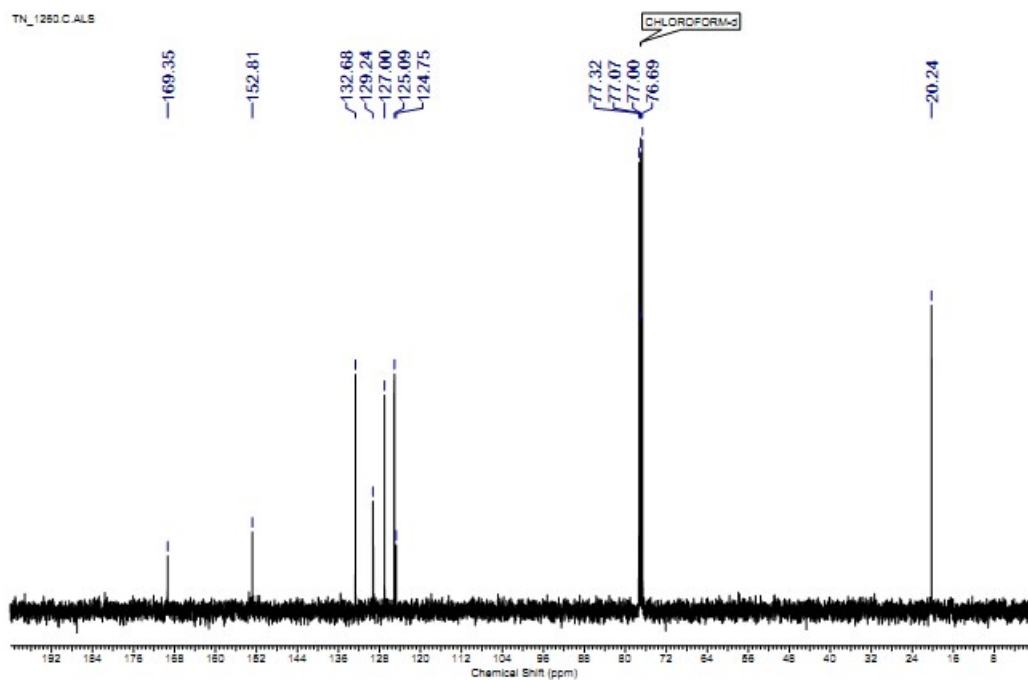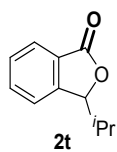

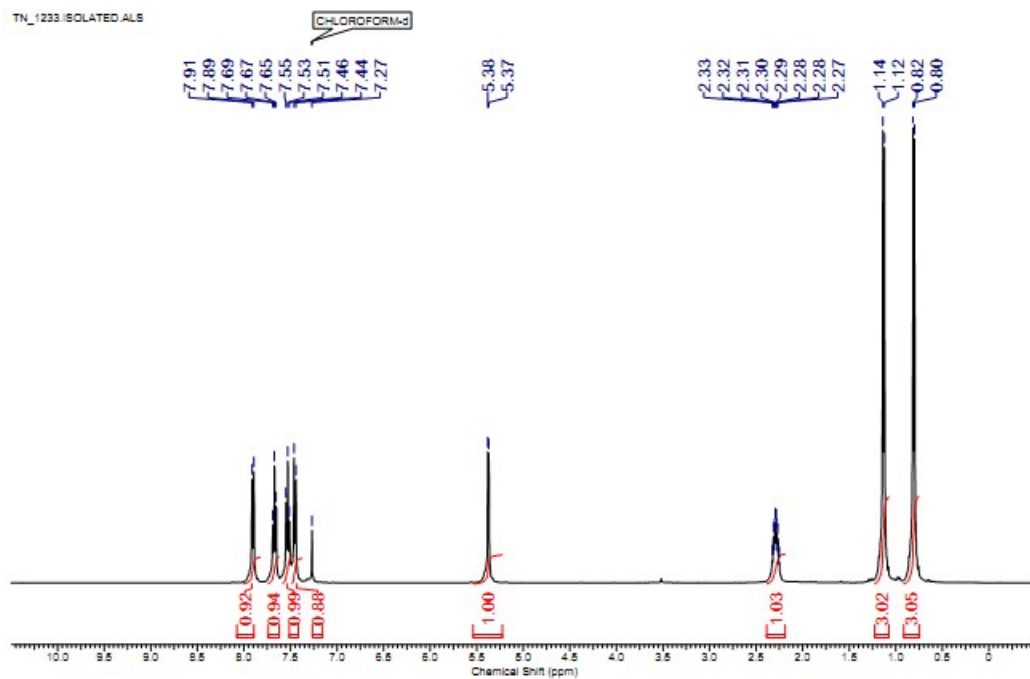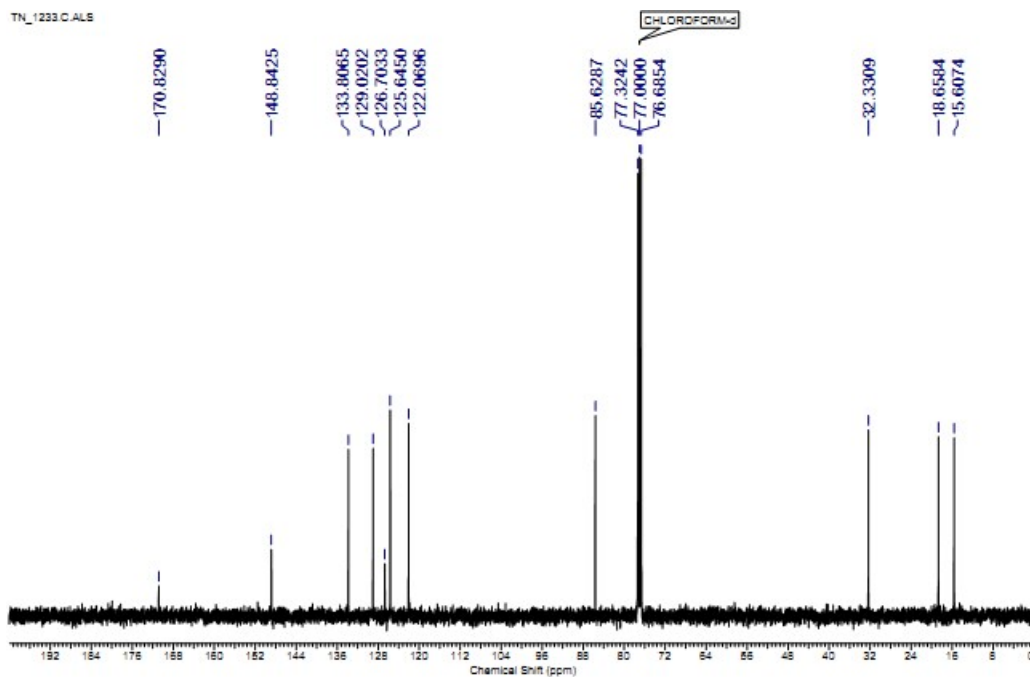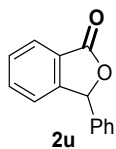

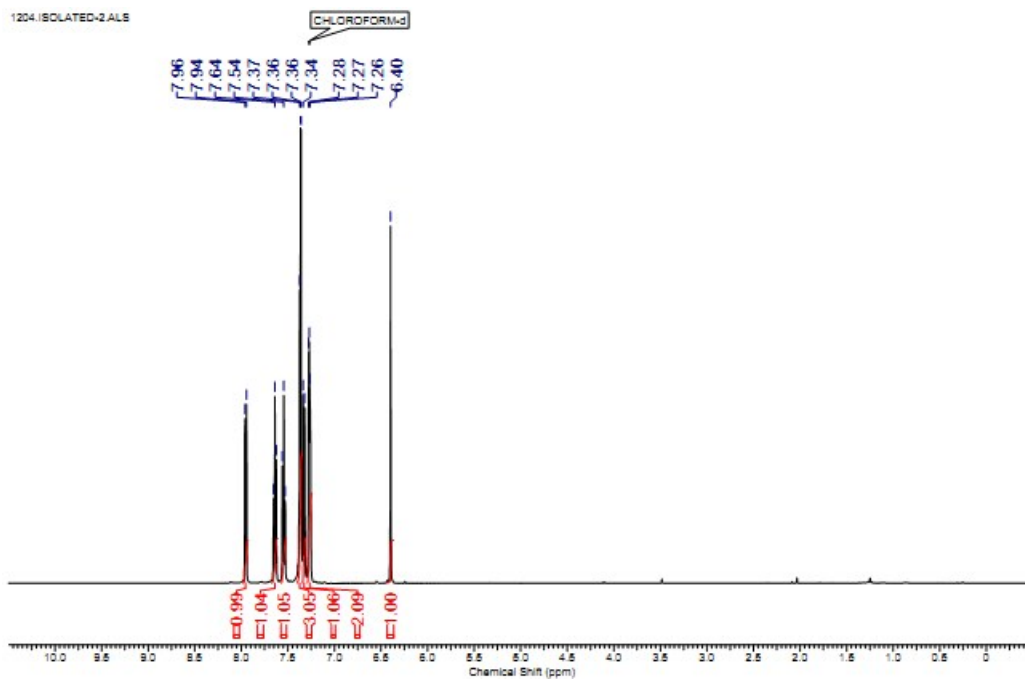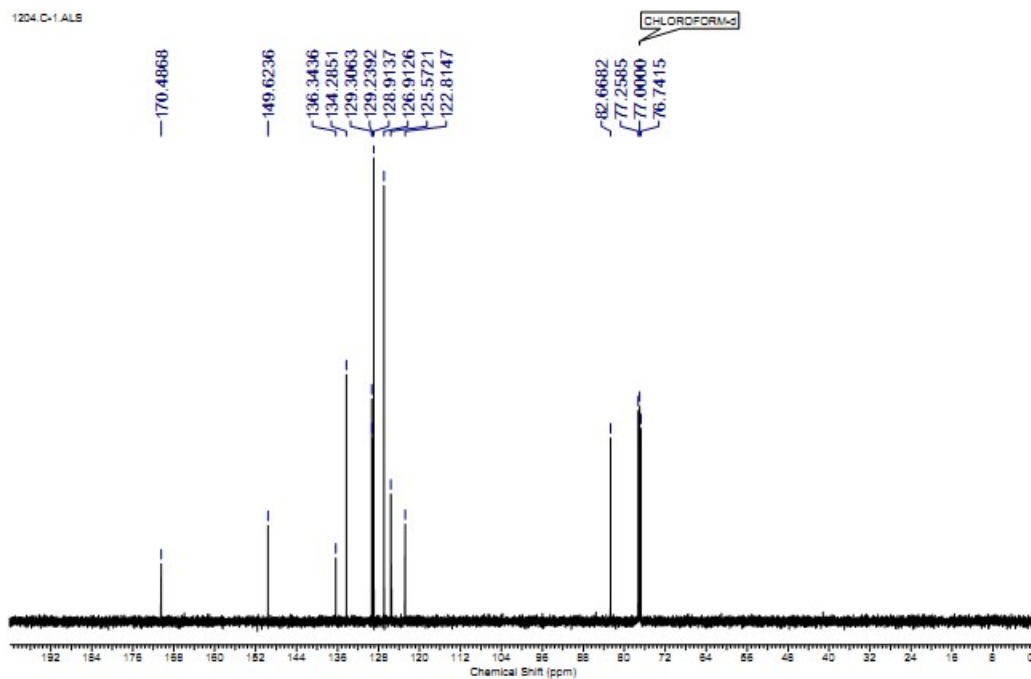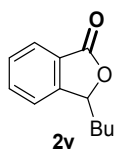

1199 D ISOLATED-2ALS

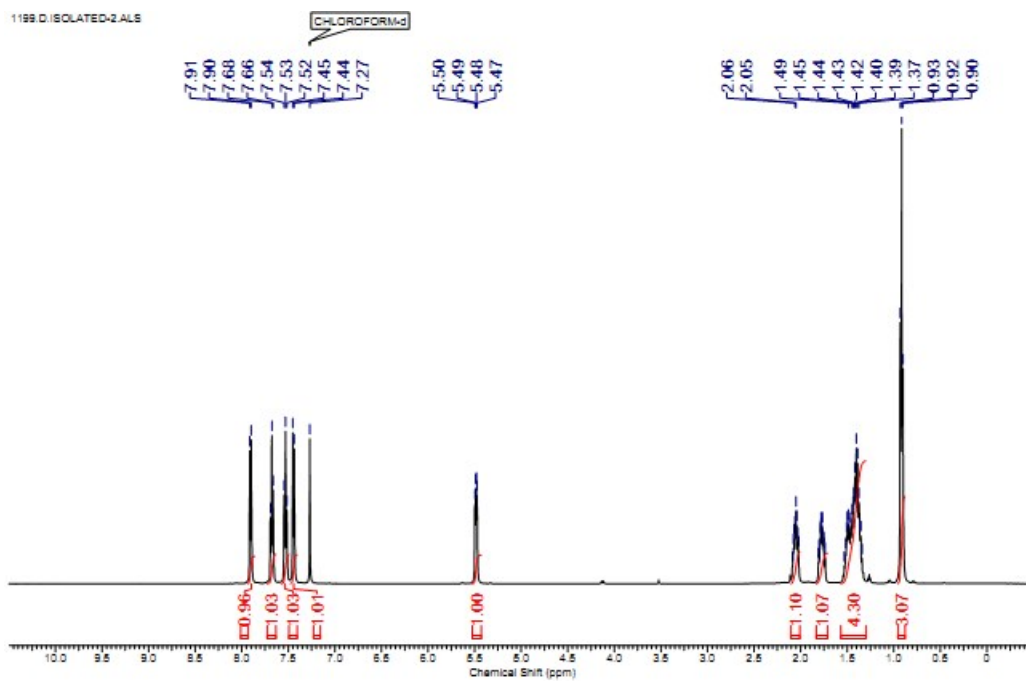

1199 C-2ALS

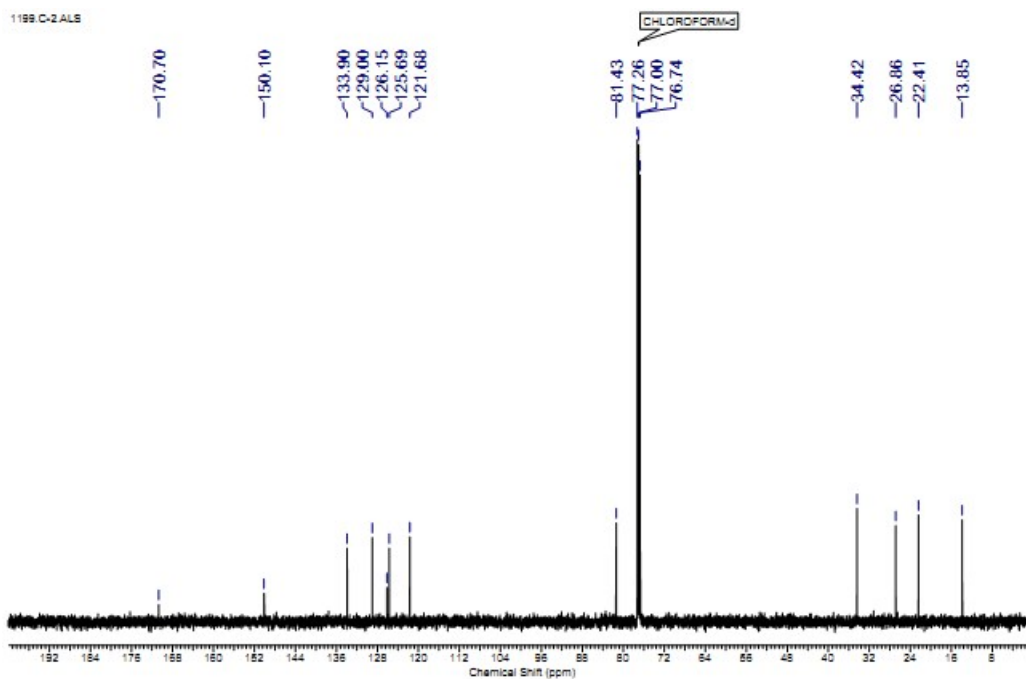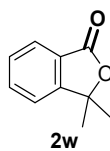

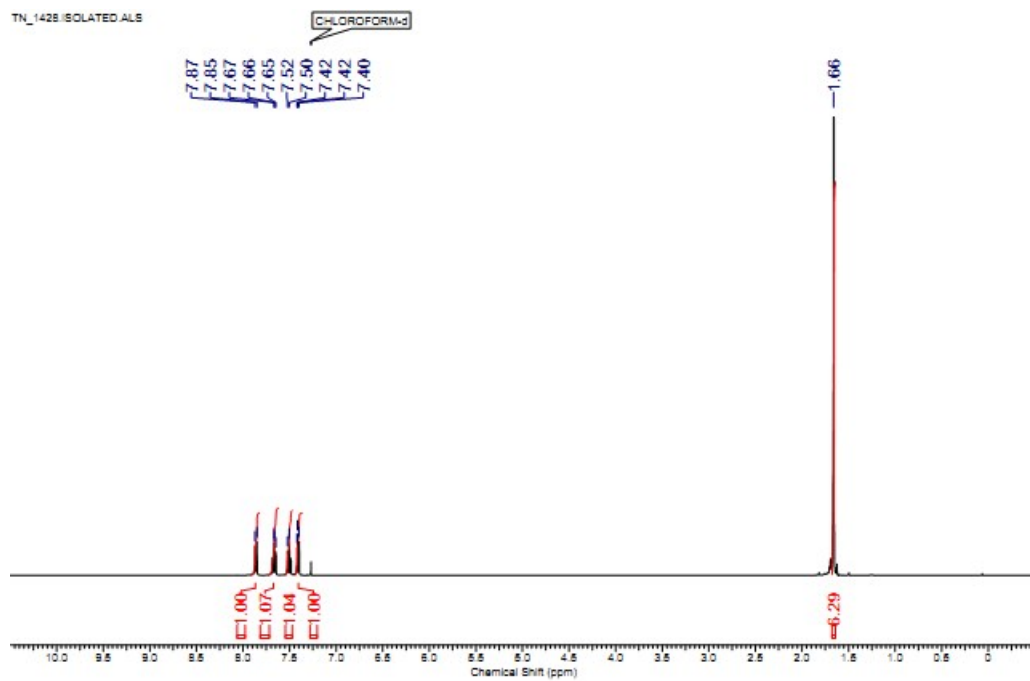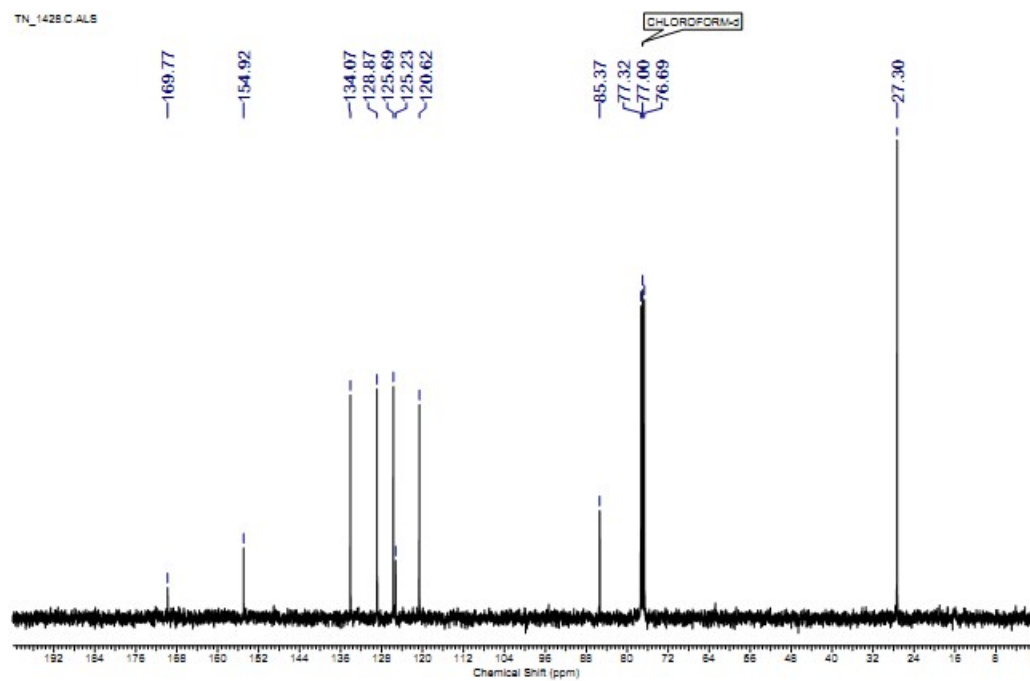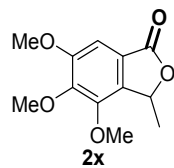

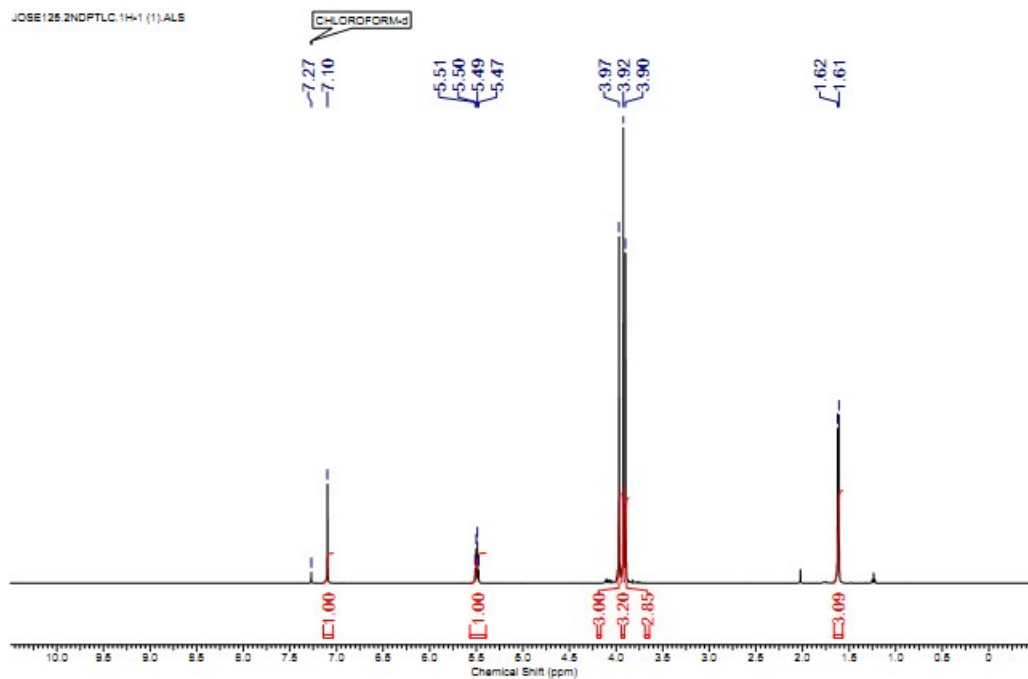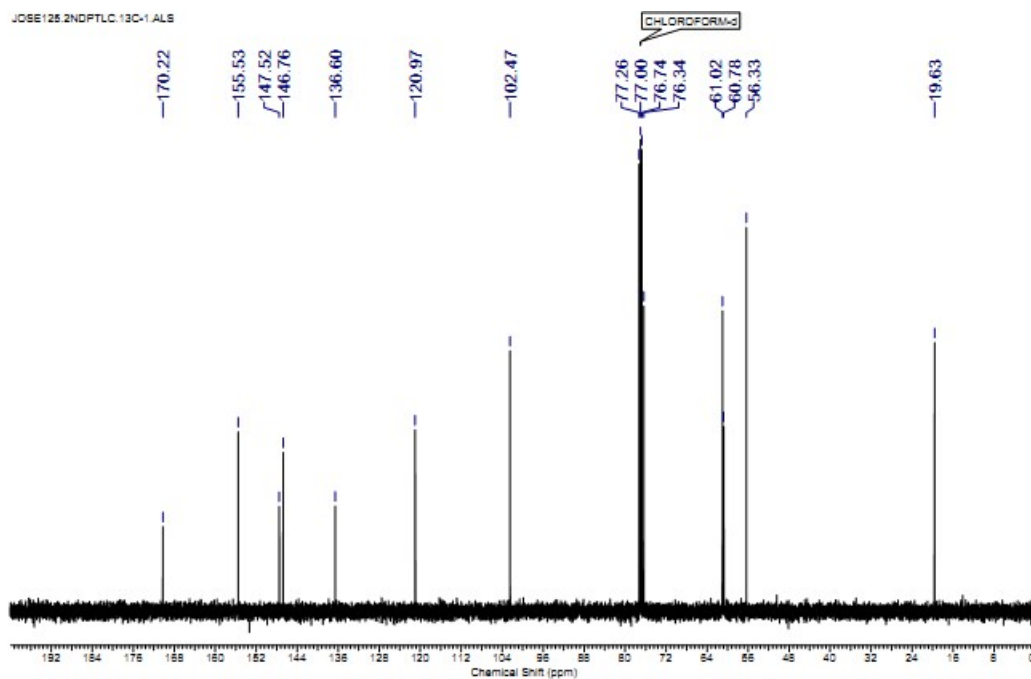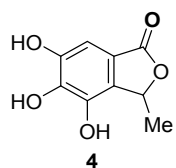

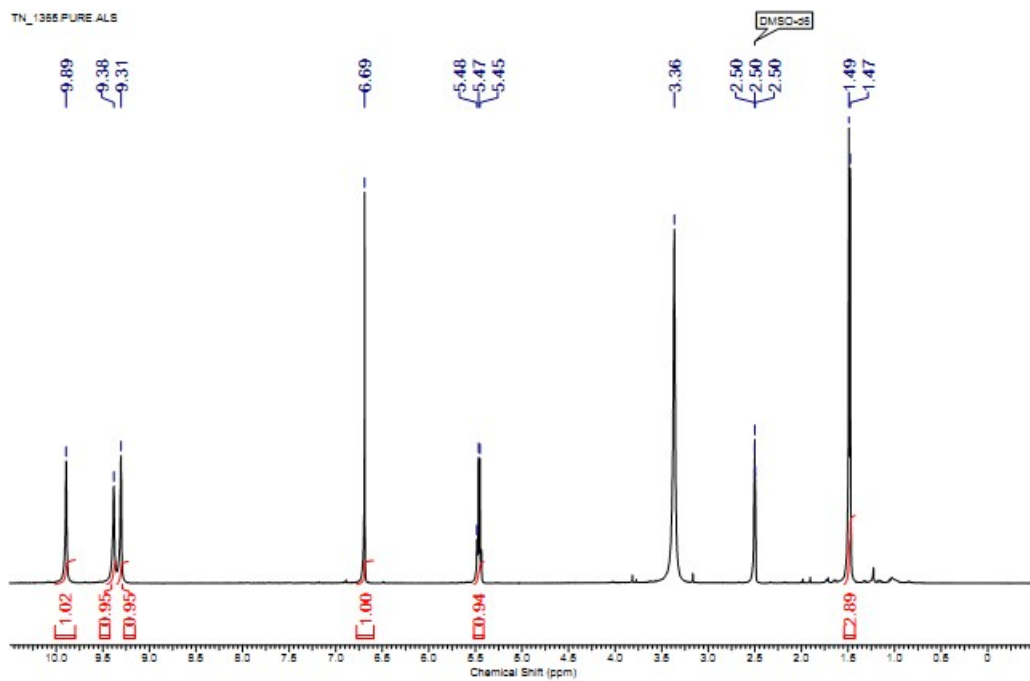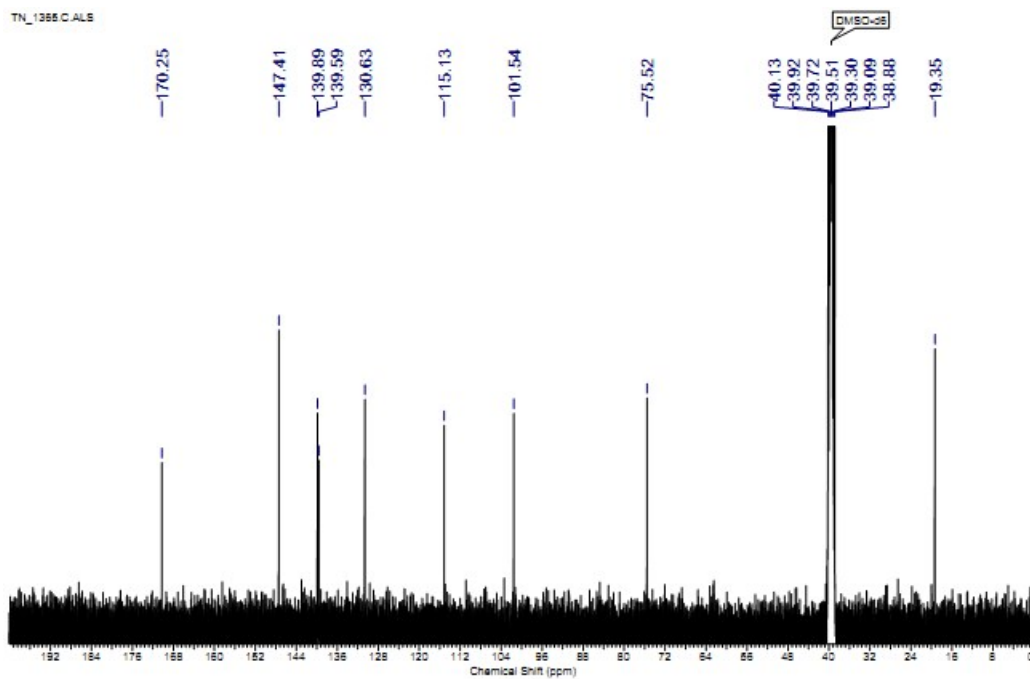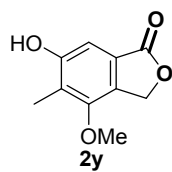



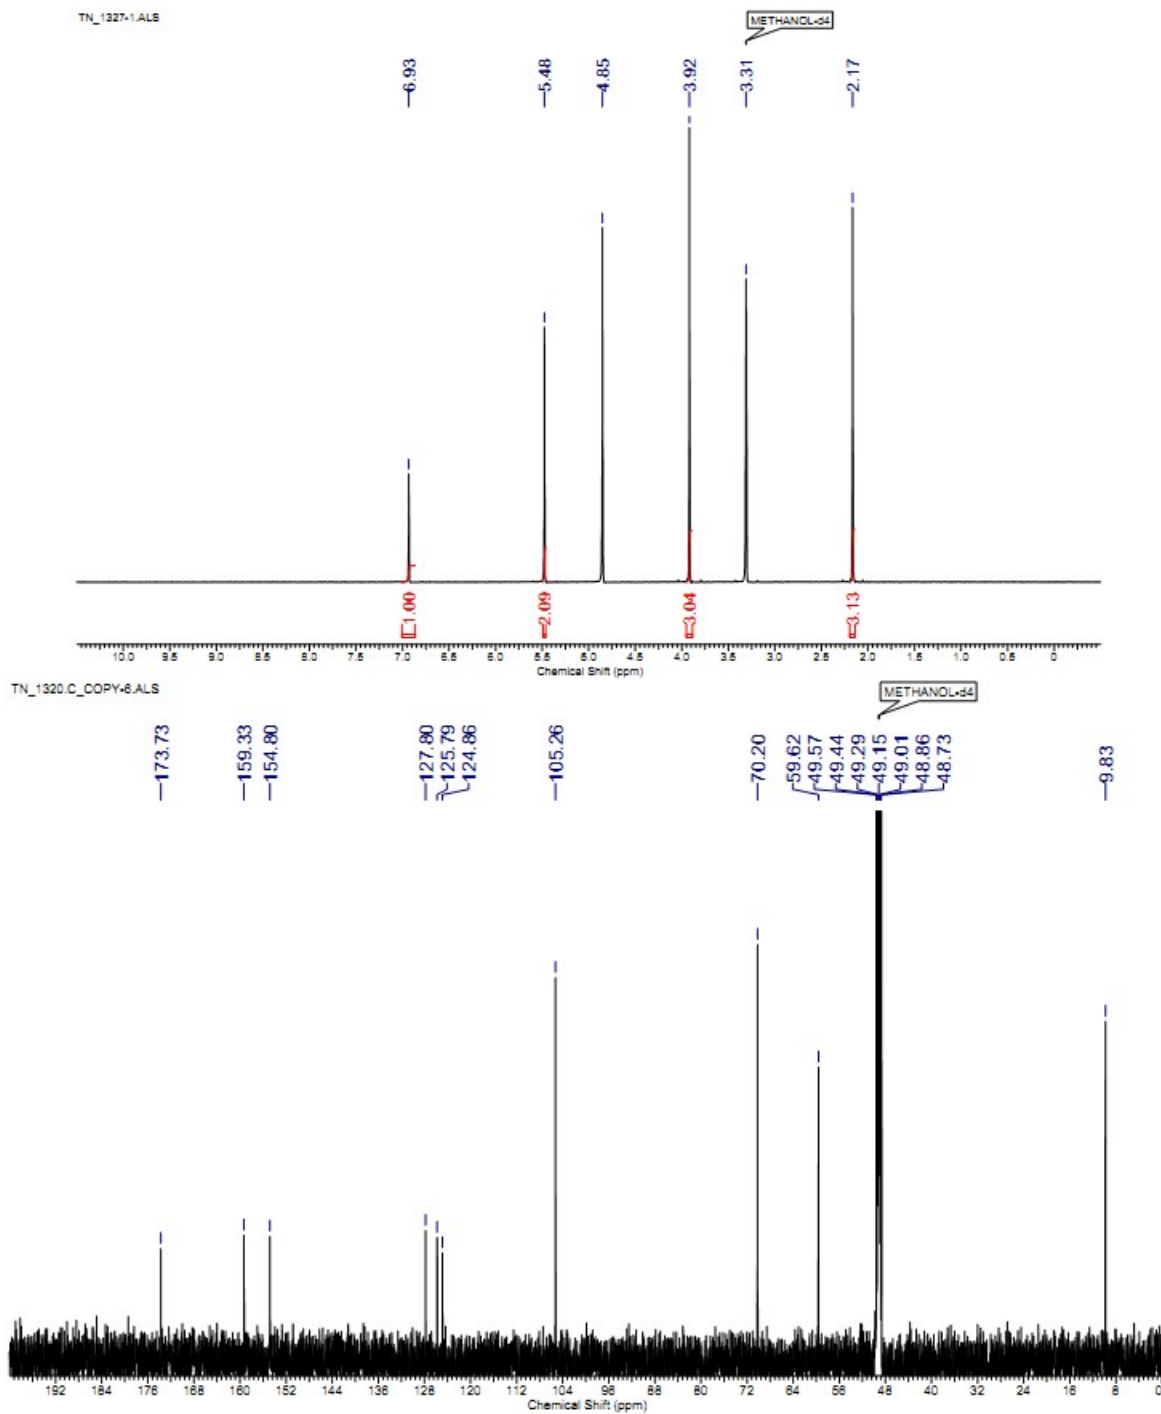

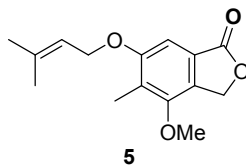

TN\_1330 CDL-1 ALB

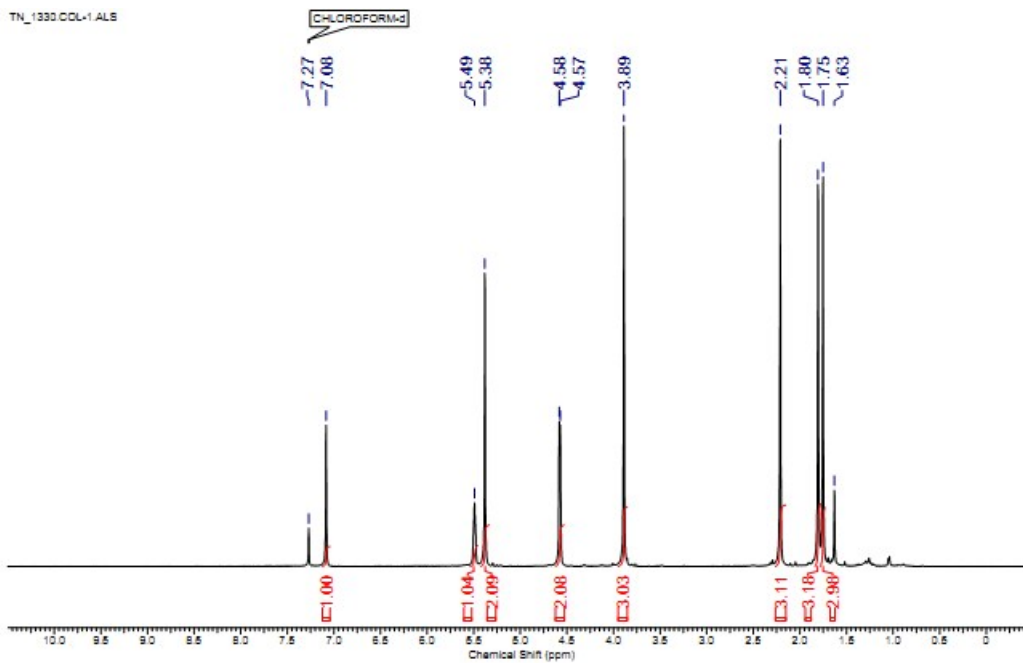

TN\_1330 C-1 ALB

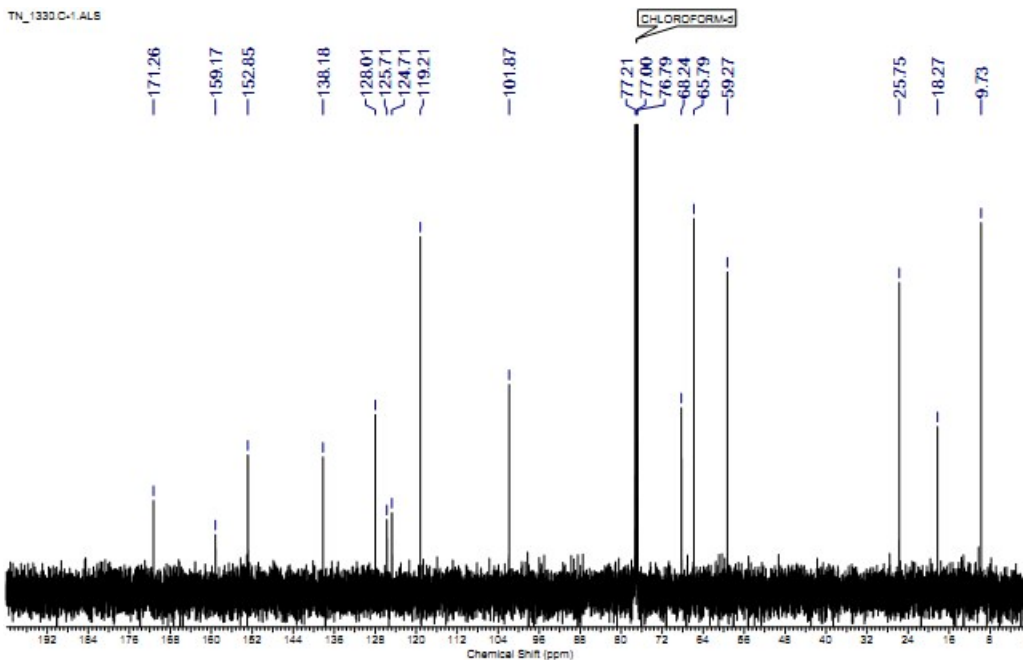

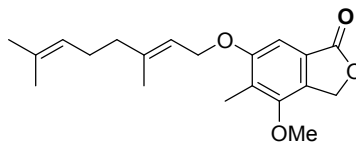

6

TN\_1331.C01.ALS

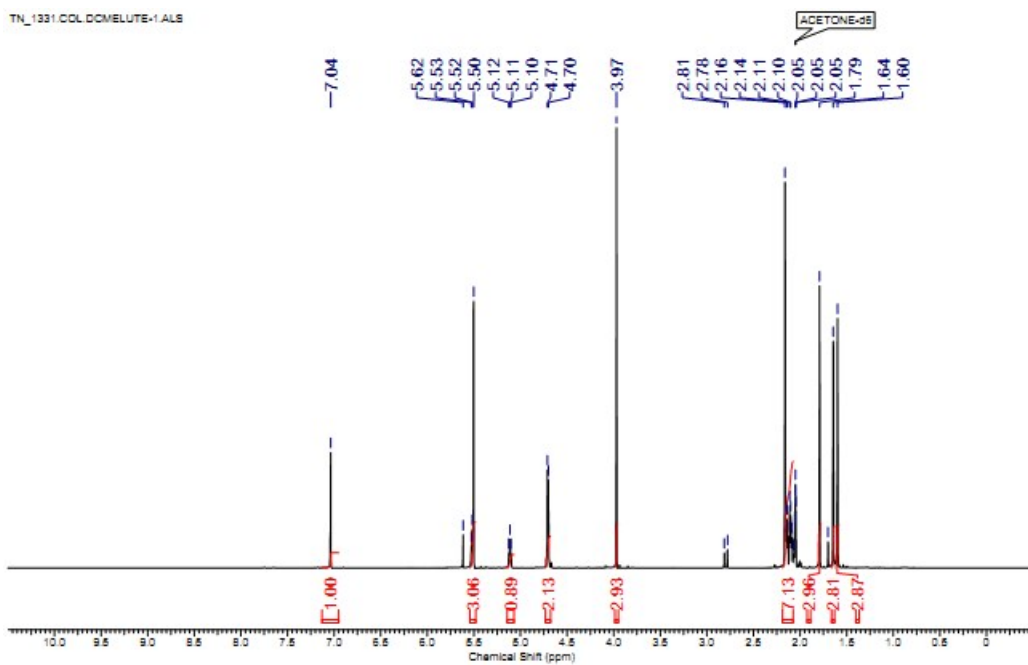

TN\_1331.C01.ALS

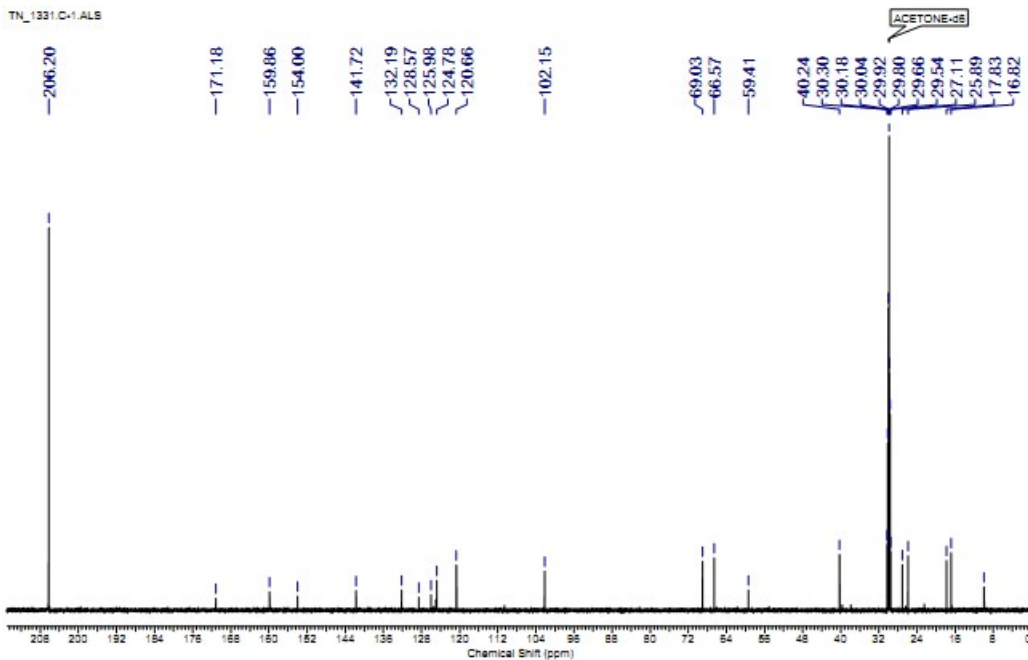

## Part VIII: HPLC Traces of Chiral Alcohols and Phthalides

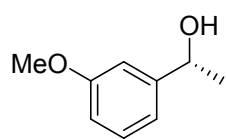

HPLC condition: OD-H,  $i$ PrOH: $n$ -Hexane = 2:98, 1 mL/min,  $t_1 = 24.993$ ,  
 $t_2 = 29.911$

HPLC chart of racemic alcohol

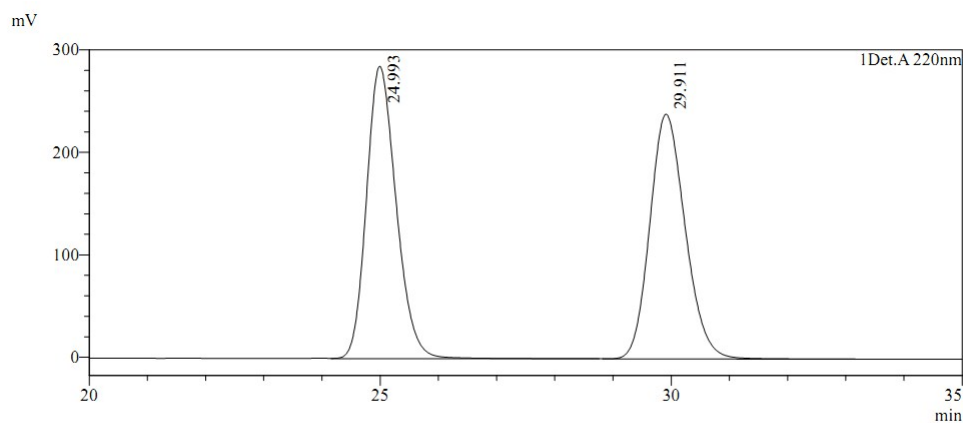

| Peak# | Ret. Time | Area     | Height | Area%  |
|-------|-----------|----------|--------|--------|
| 1     | 24.993    | 10119073 | 285245 | 49.996 |
| 2     | 29.911    | 10120787 | 238889 | 50.004 |

HPLC chart of chiral alcohol

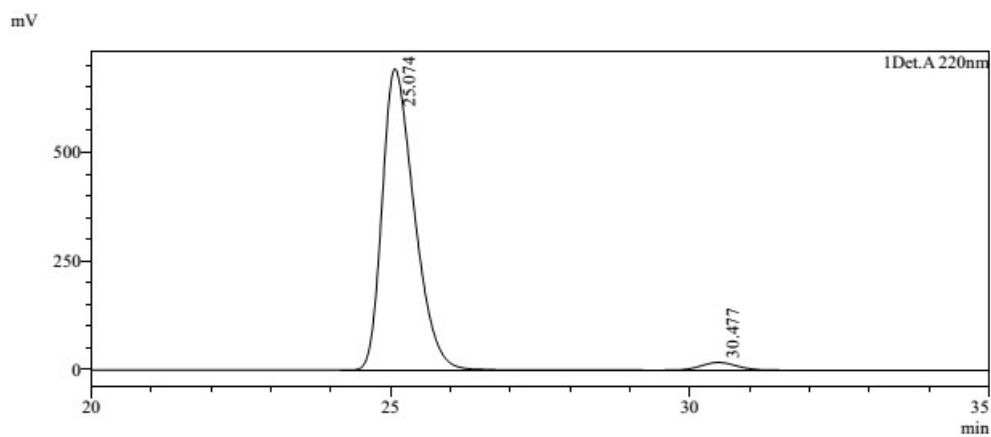

| Peak# | Ret. Time | Area     | Height | Area%  |
|-------|-----------|----------|--------|--------|
| 1     | 25.074    | 25983680 | 694049 | 97.083 |
| 2     | 30.477    | 780680   | 18248  | 2.917  |

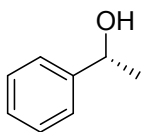

HPLC condition: OD-H,  $i$ PrOH: $n$ -Hexane = 2:98, 1 mL/min,  $t_1 = 14.994$ ,  $t_2 = 18.731$

HPLC chart of racemic alcohol:

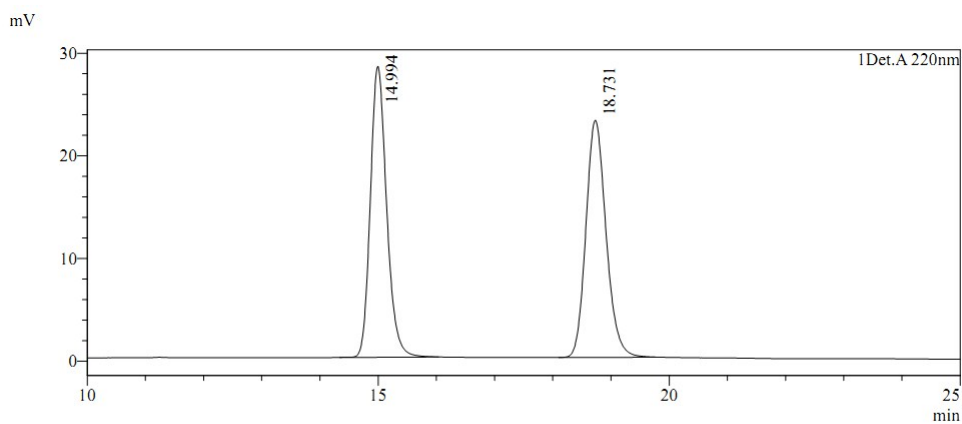

| Peak# | Ret. Time | Area   | Height | Area%  |
|-------|-----------|--------|--------|--------|
| 1     | 14.994    | 551402 | 28339  | 49.827 |
| 2     | 18.731    | 555225 | 23085  | 50.173 |

HPLC chart of chiral alcohol

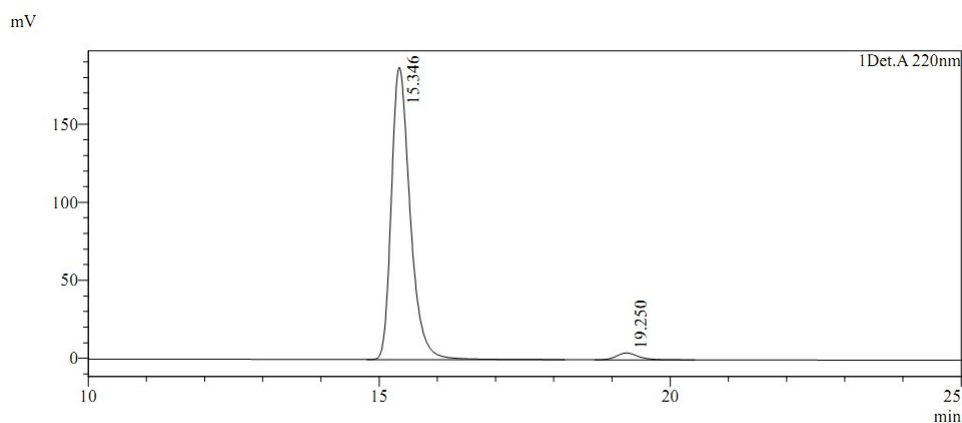

| Peak# | Ret. Time | Area    | Height | Area%  |
|-------|-----------|---------|--------|--------|
| 1     | 15.346    | 4207920 | 187356 | 97.370 |
| 2     | 19.250    | 113660  | 4352   | 2.630  |

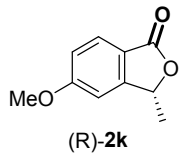

HPLC Condition: OD-H, *i*PrOH:*n*-Hexane = 2:98, 1 mL/min,  $t_1 = 24.167$ ,  $t_2 = 26.835$

HPLC chart of racemic phthalide:

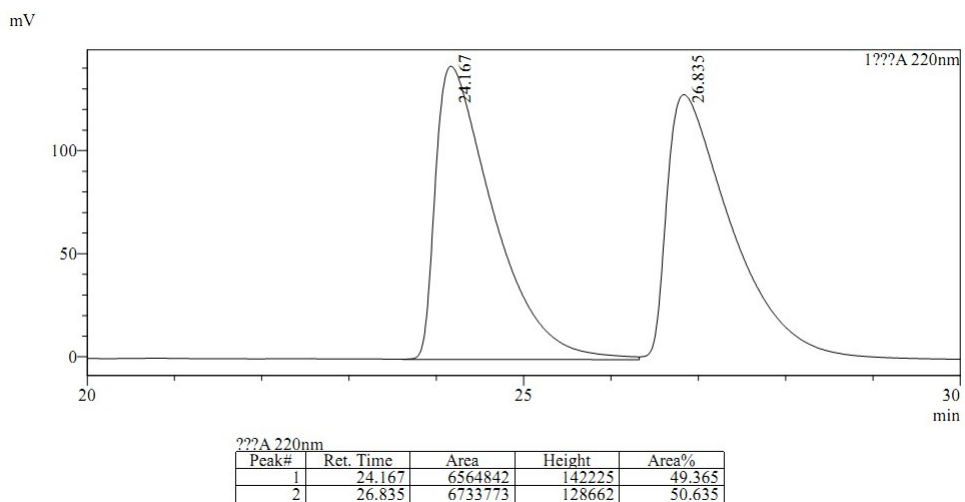

HPLC chart of chiral phthalide:

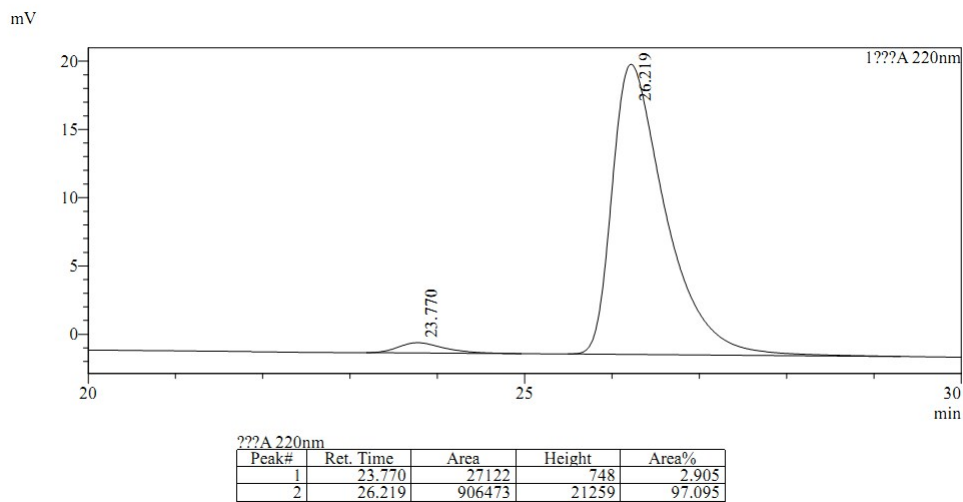

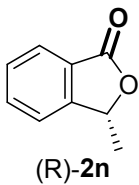

HPLC Condition: OD-H, *i*PrOH:*n*-Hexane = 2:98, 1 mL/min,  $t_1 = 24.167$ ,  $t_2 = 26.835$

HPLC chart of racemic phthalide:

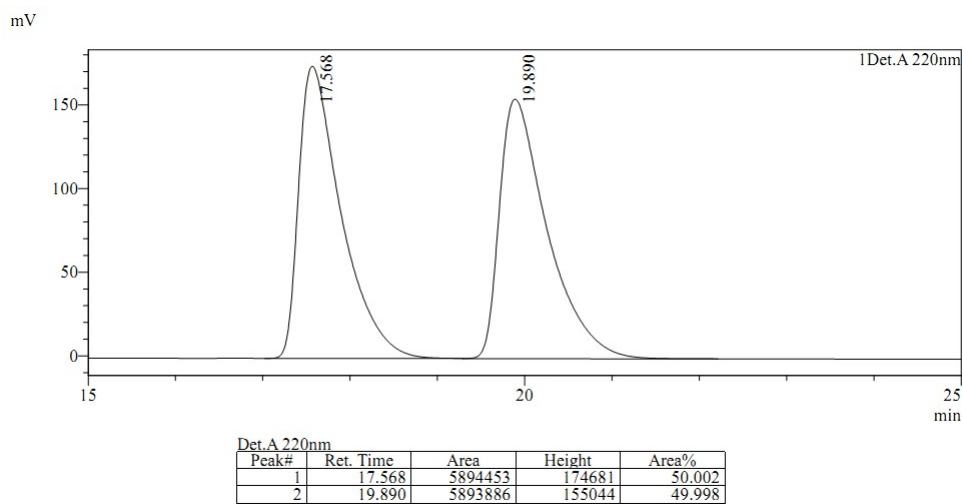

HPLC chart of chiral phthalide:

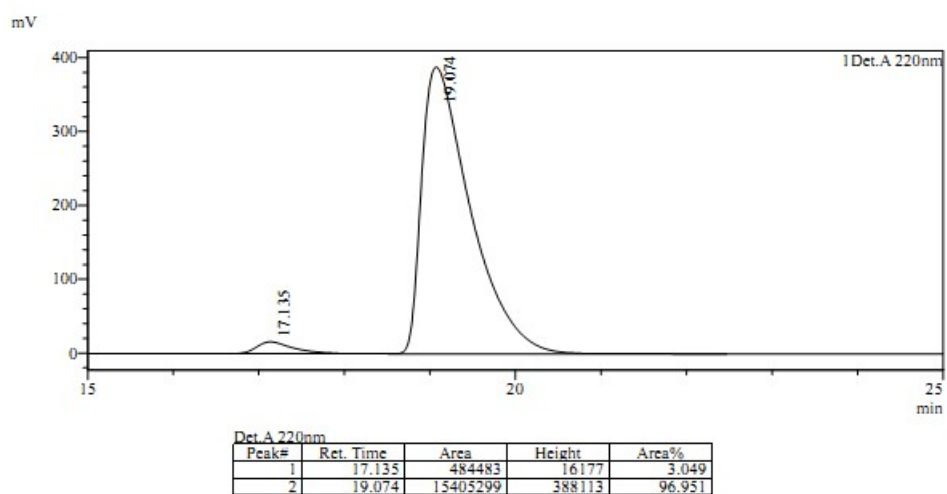

Supplement: c7gc00917h1.pdf [file c7gc00917h1.pdf]
